# Supplementary material for: A general and efficient approach to 2H-indazoles and 1H-pyrazoles through copper-catalyzed intramolecular N–N bond formation under mild conditions
Source: Royal Society of Chemistry journal article supplement (doi:10.1039/c1cc13908h), 2011-01-01

# A General and Efficient Approach to 2*H*-Indazoles and 1*H*-Pyrazoles Through Copper-catalyzed Intramolecular N-N Bond Formation under Mild Conditions

Jiantao Hu, Yongfeng Cheng, Yiqing Yang, and Yu Rao\*

*Department of Pharmacology and Pharmaceutical Sciences, School of life sciences and School of  
Medicine, Tsinghua University, Beijing 100084, China*

[yrao@mail.tsinghua.edu.cn](mailto:yrao@mail.tsinghua.edu.cn)

## Supporting Information 2

### Table of Contents

|      |                                                                        |      |
|------|------------------------------------------------------------------------|------|
| I.   | Spectral Data for Substrates.....                                      | s-2  |
| II.  | Spectral Data for 2 <i>H</i> -Indazoles.....                           | s-9  |
| III. | Spectral Data for 1 <i>H</i> -Pyrazoles.....                           | s-36 |
| IV.  | Spectral Data for Selective Ligand for Estrogen Receptor $\beta$ ..... | s-53 |

Supporting Information 2

<sup>1</sup>H NMR

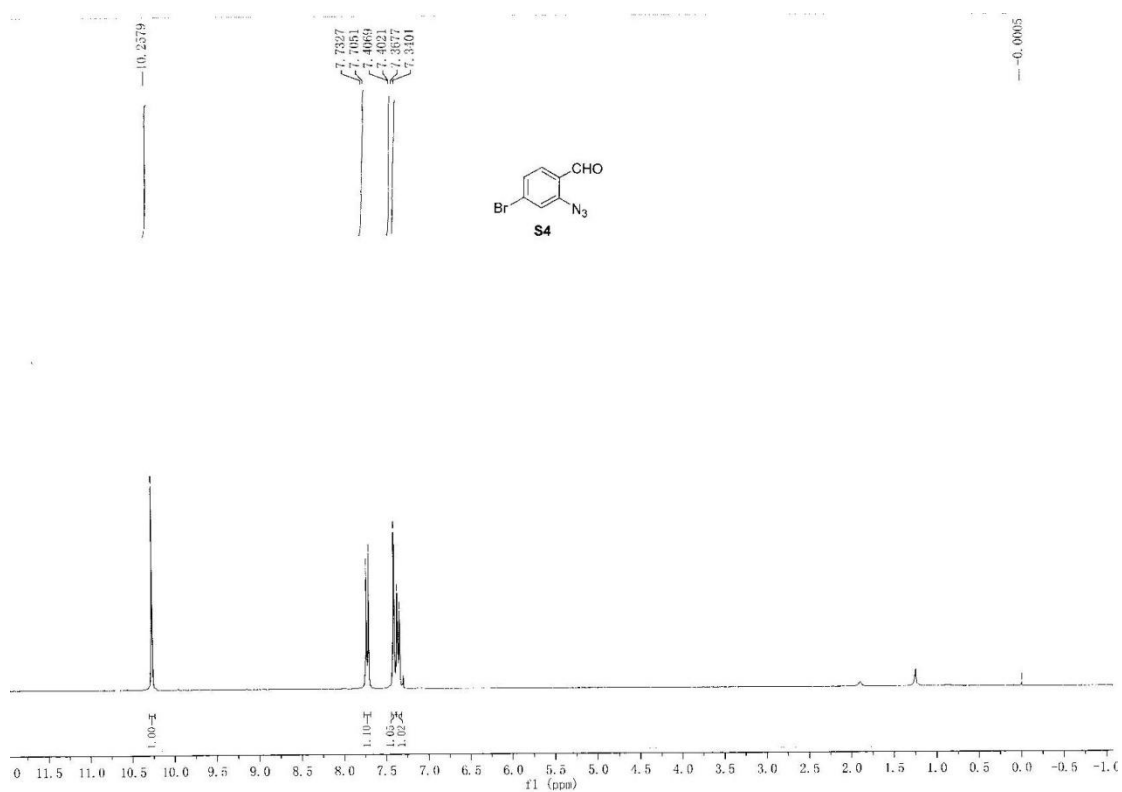

<sup>13</sup>C NMR

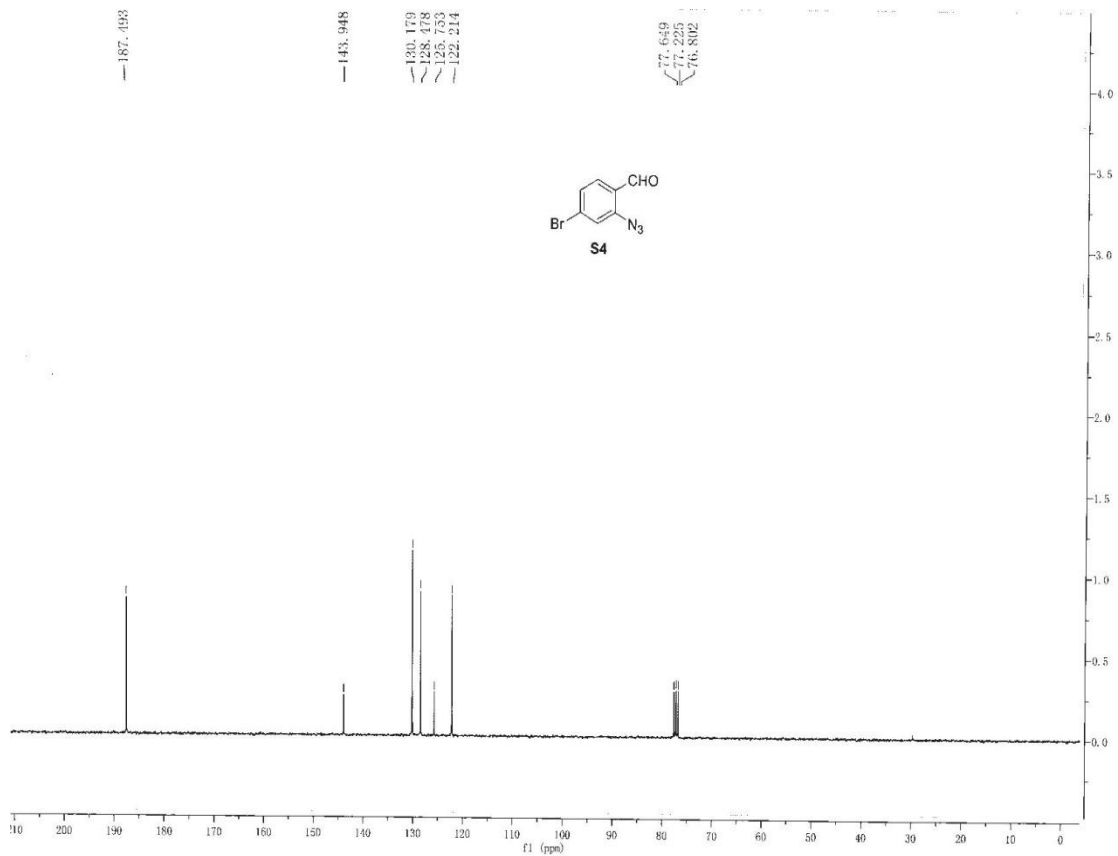

Supporting Information 2

<sup>1</sup>H NMR

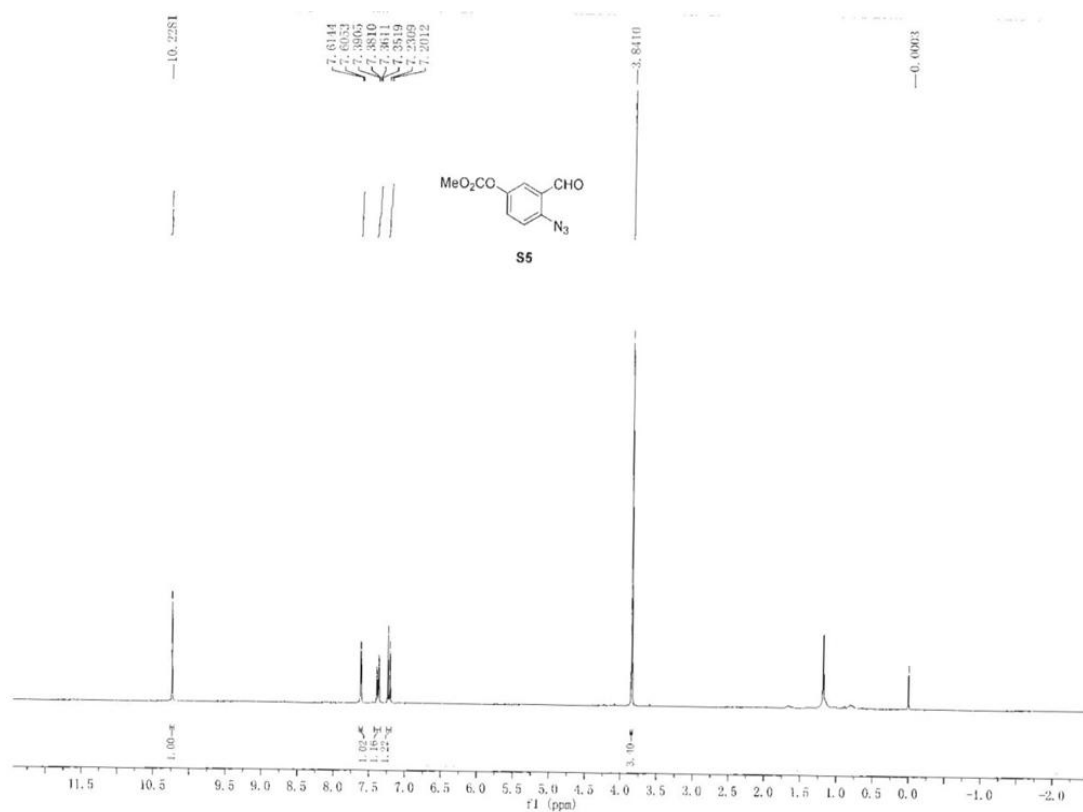

<sup>13</sup>C NMR

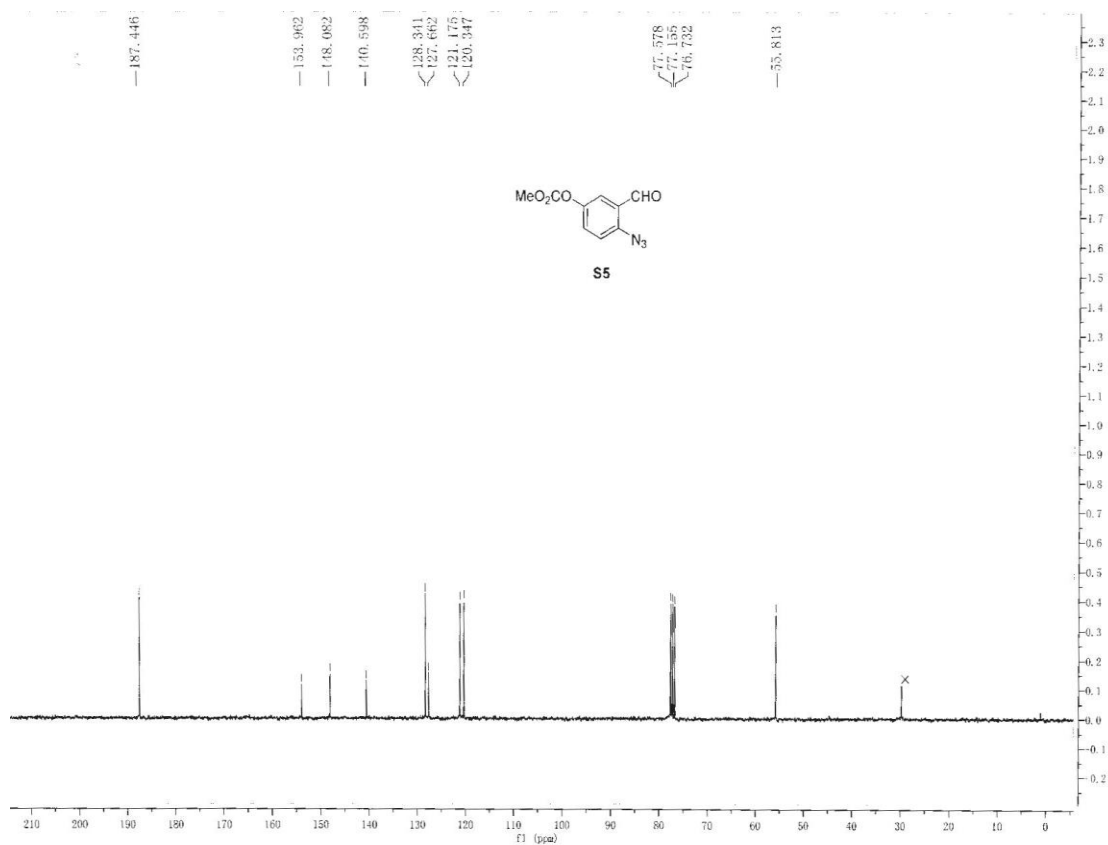

Supporting Information 2

<sup>1</sup>H NMR

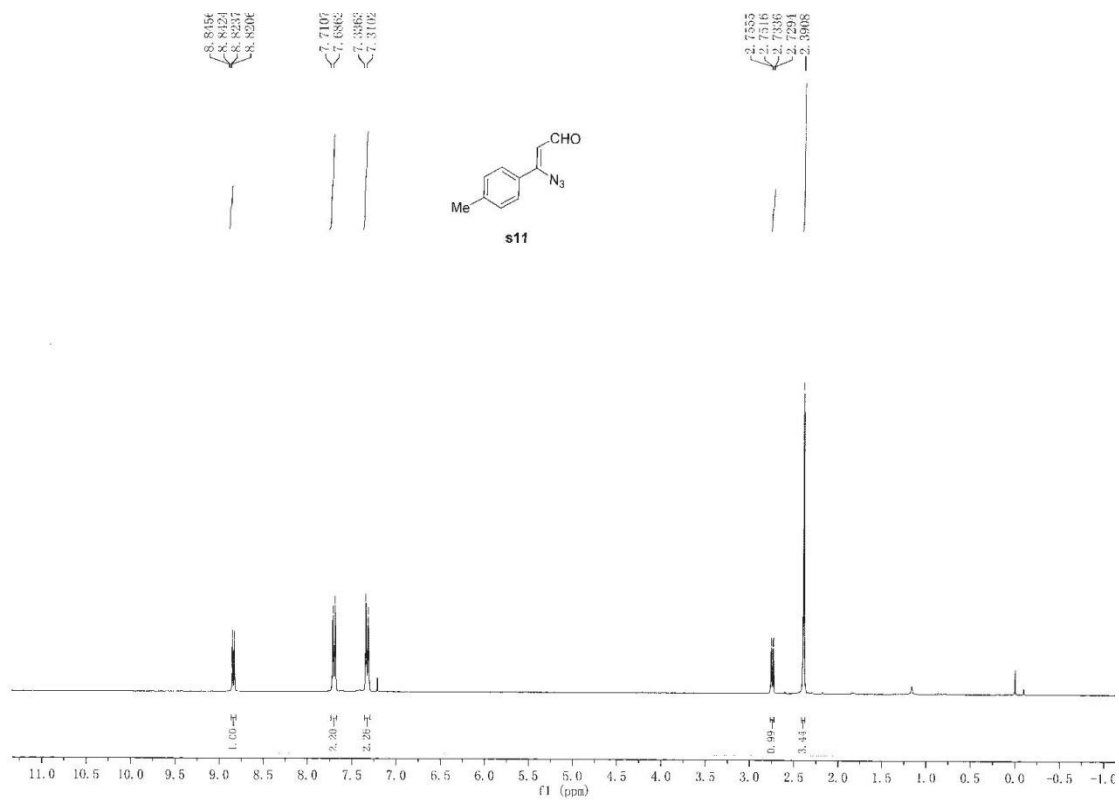

<sup>13</sup>C NMR

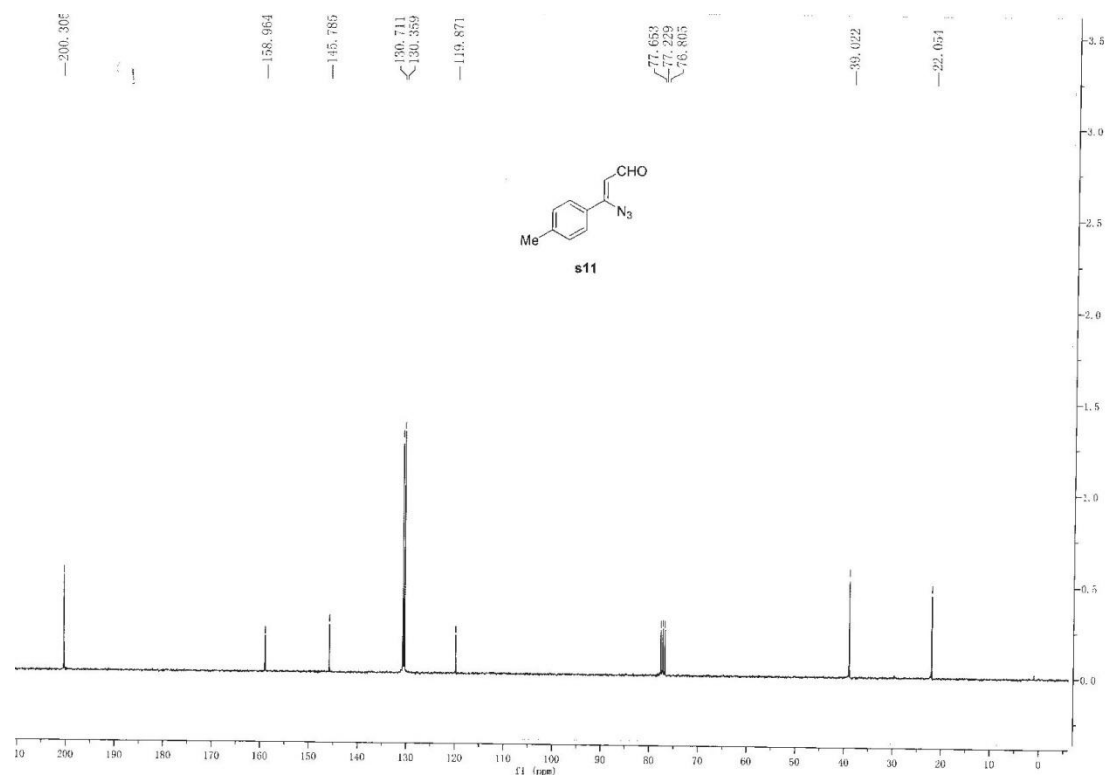

Supporting Information 2

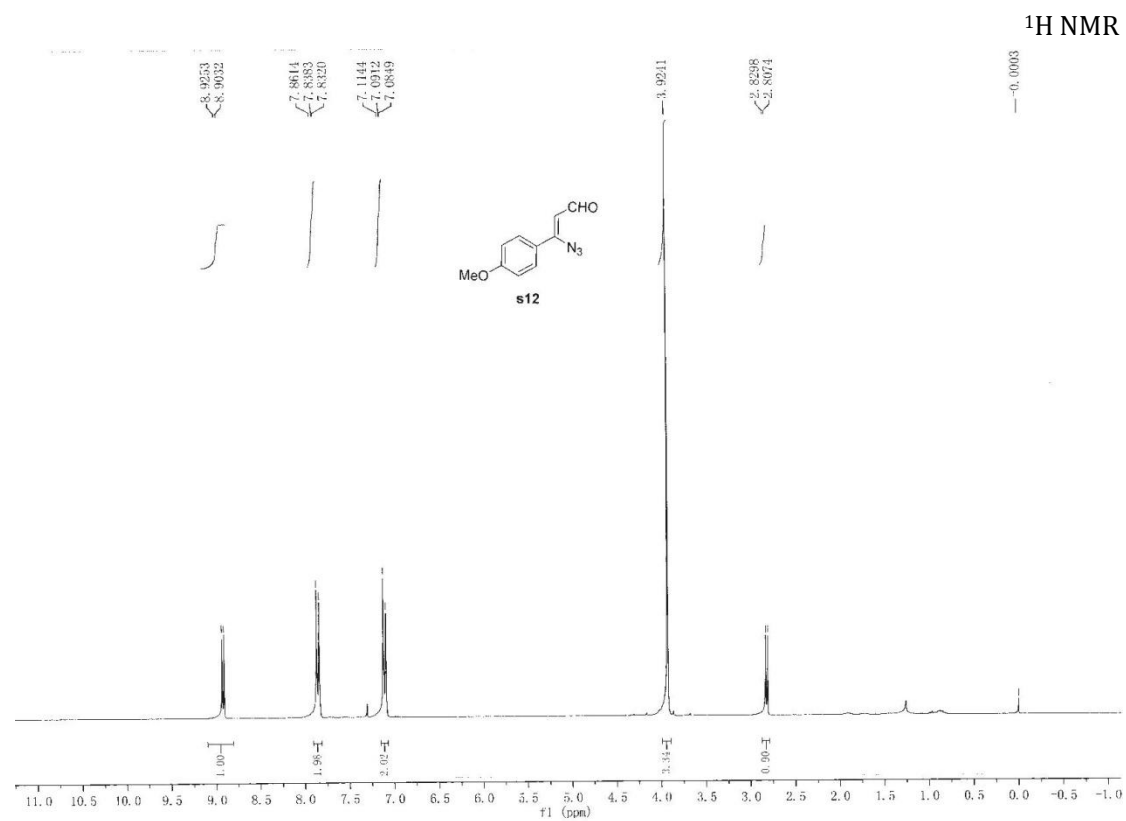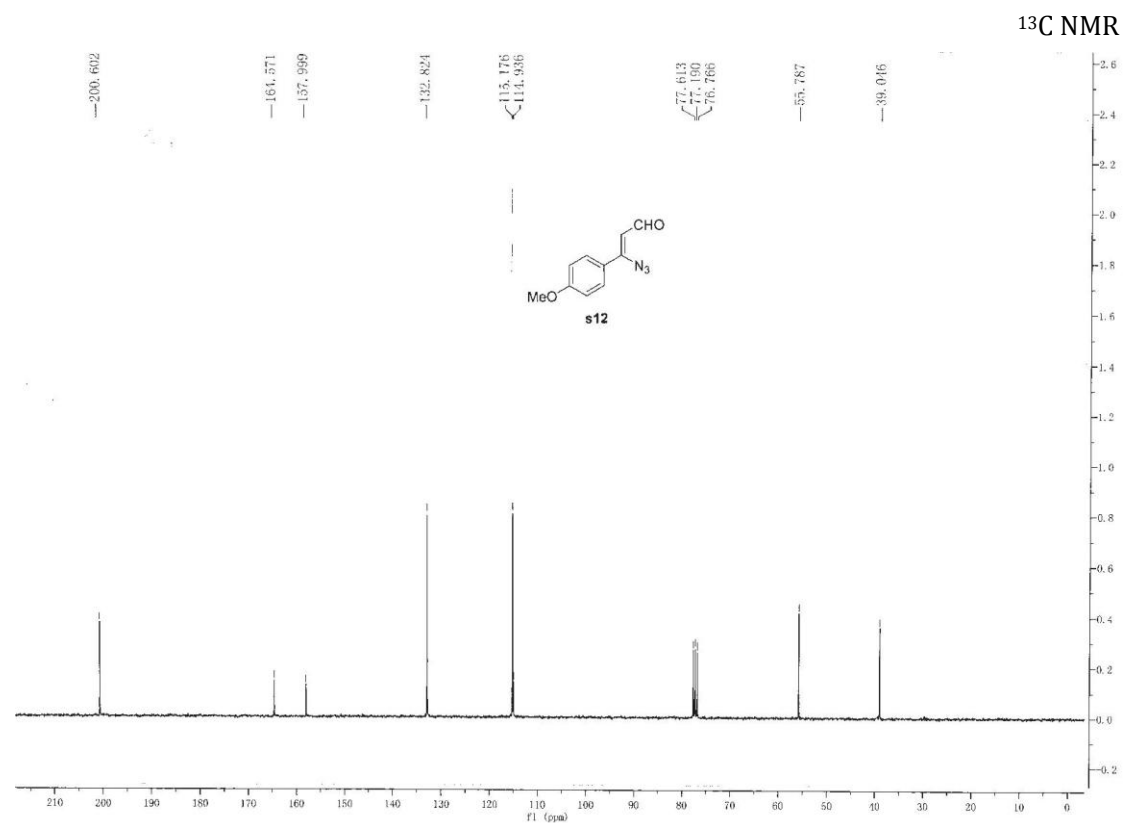

Supporting Information 2

<sup>1</sup>H NMR

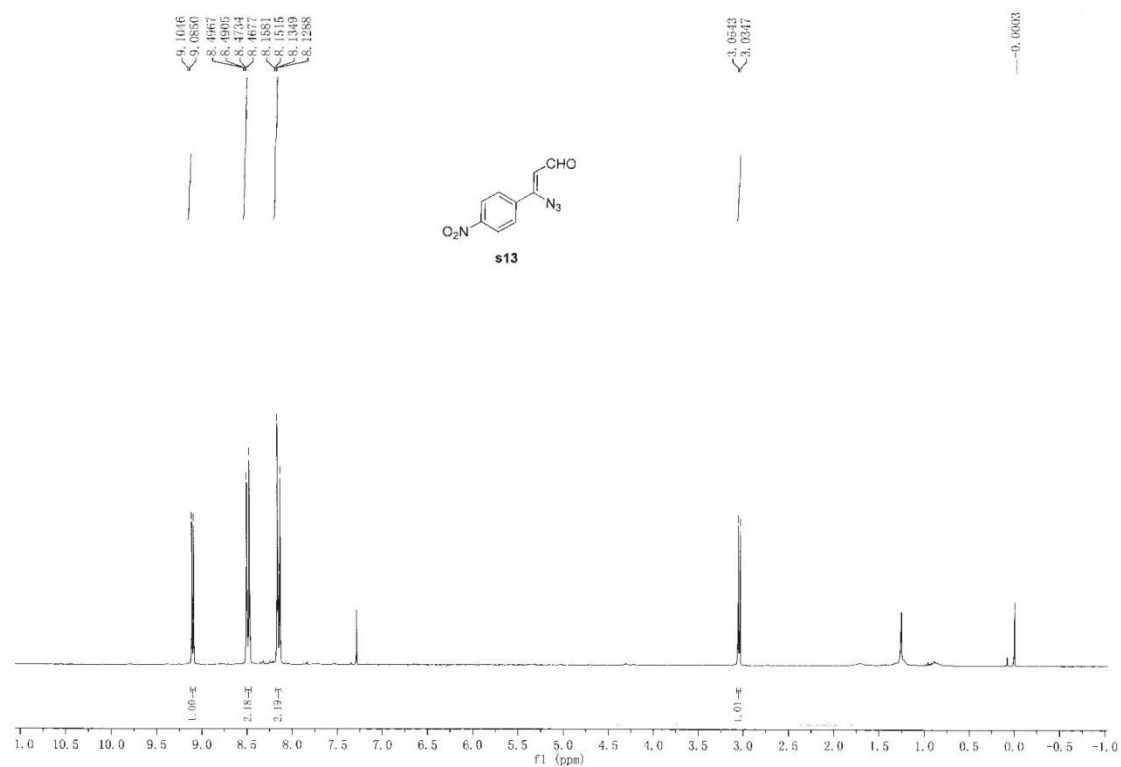

<sup>13</sup>C NMR

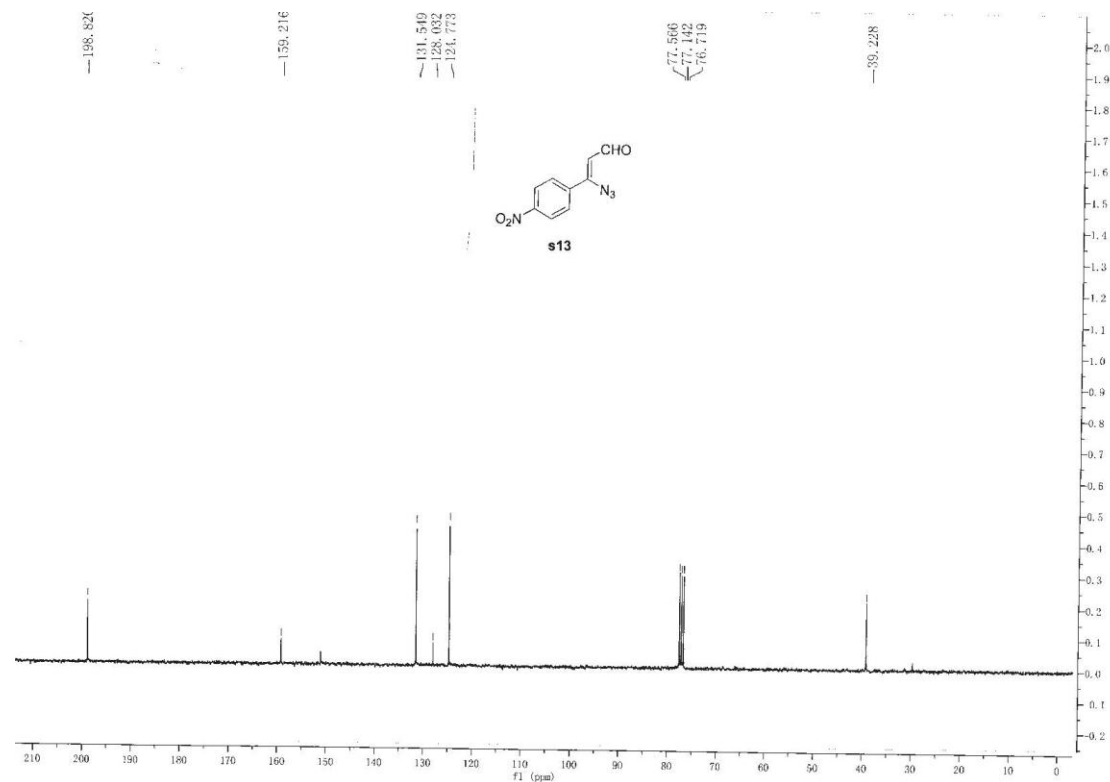

Supporting Information 2

<sup>1</sup>H NMR

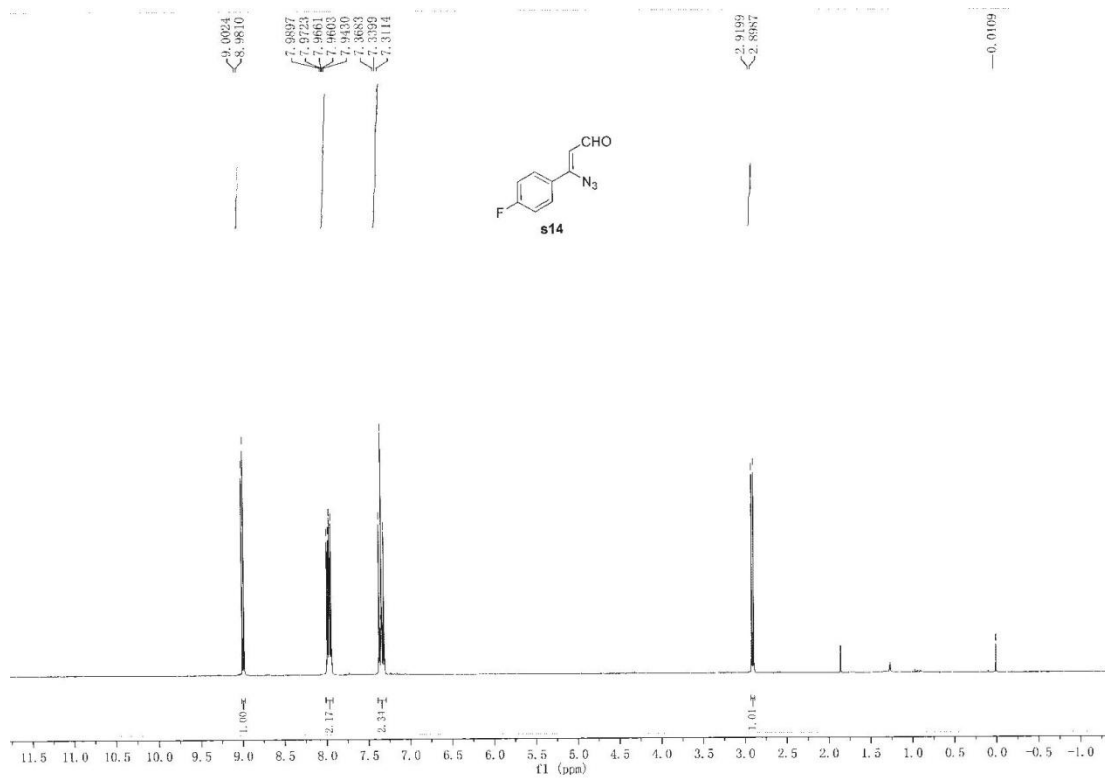

<sup>13</sup>C NMR

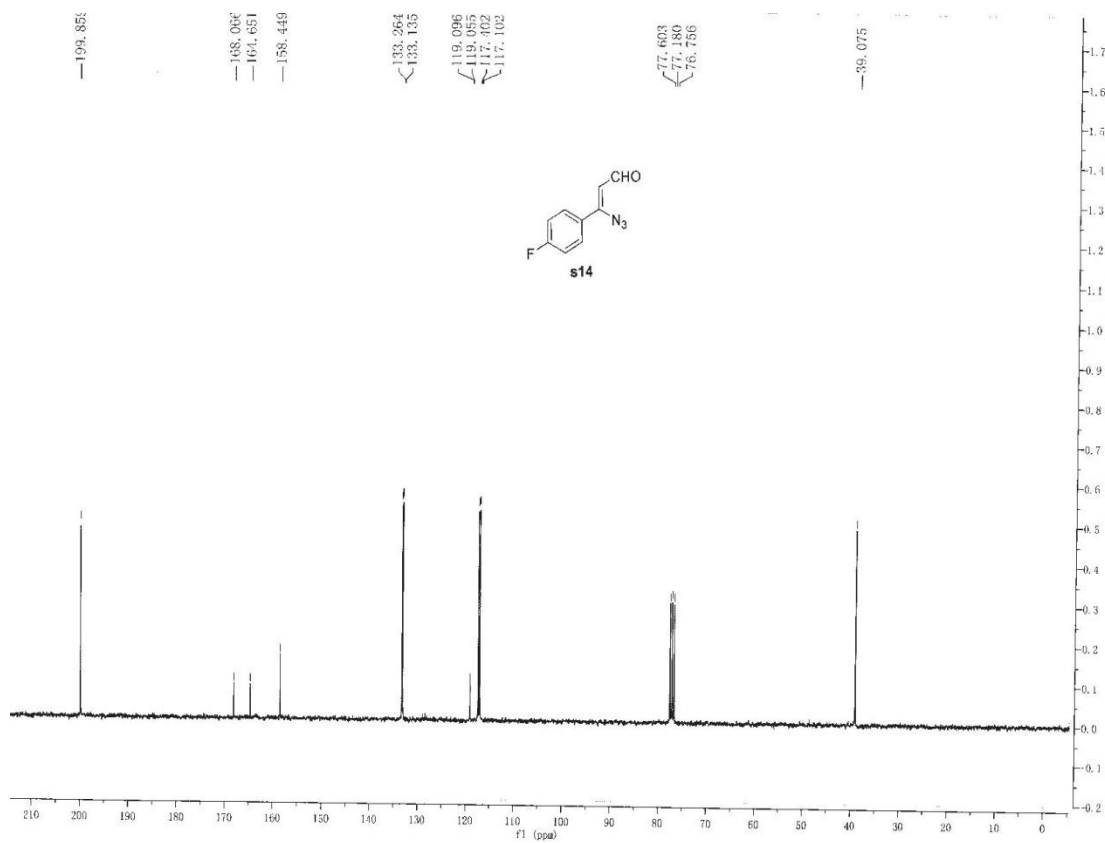

Supporting Information 2

<sup>1</sup>H NMR

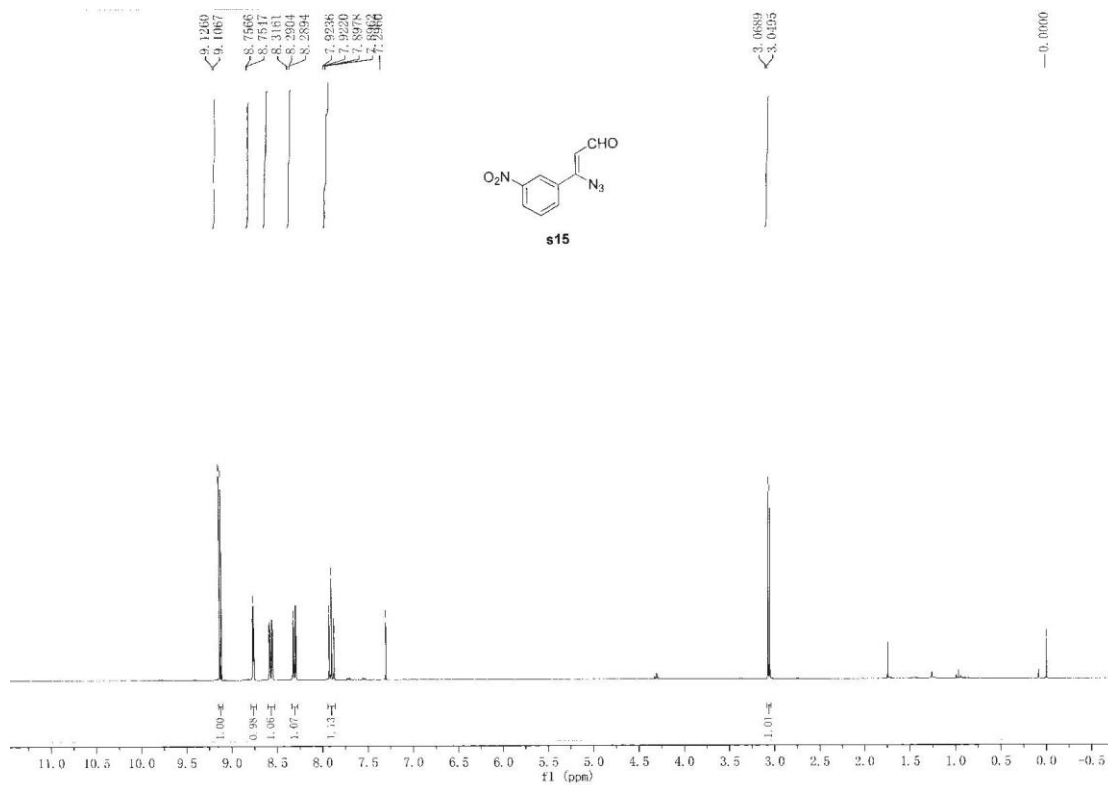

<sup>13</sup>C NMR

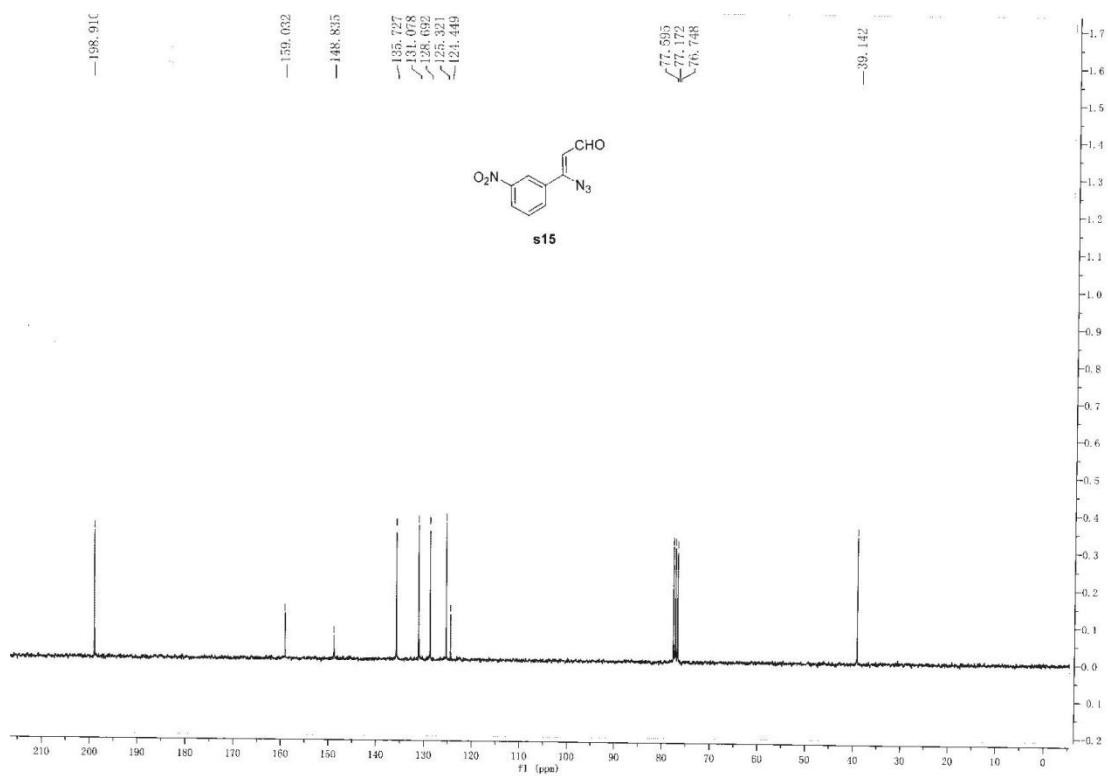



Supporting Information 2

<sup>1</sup>H NMR

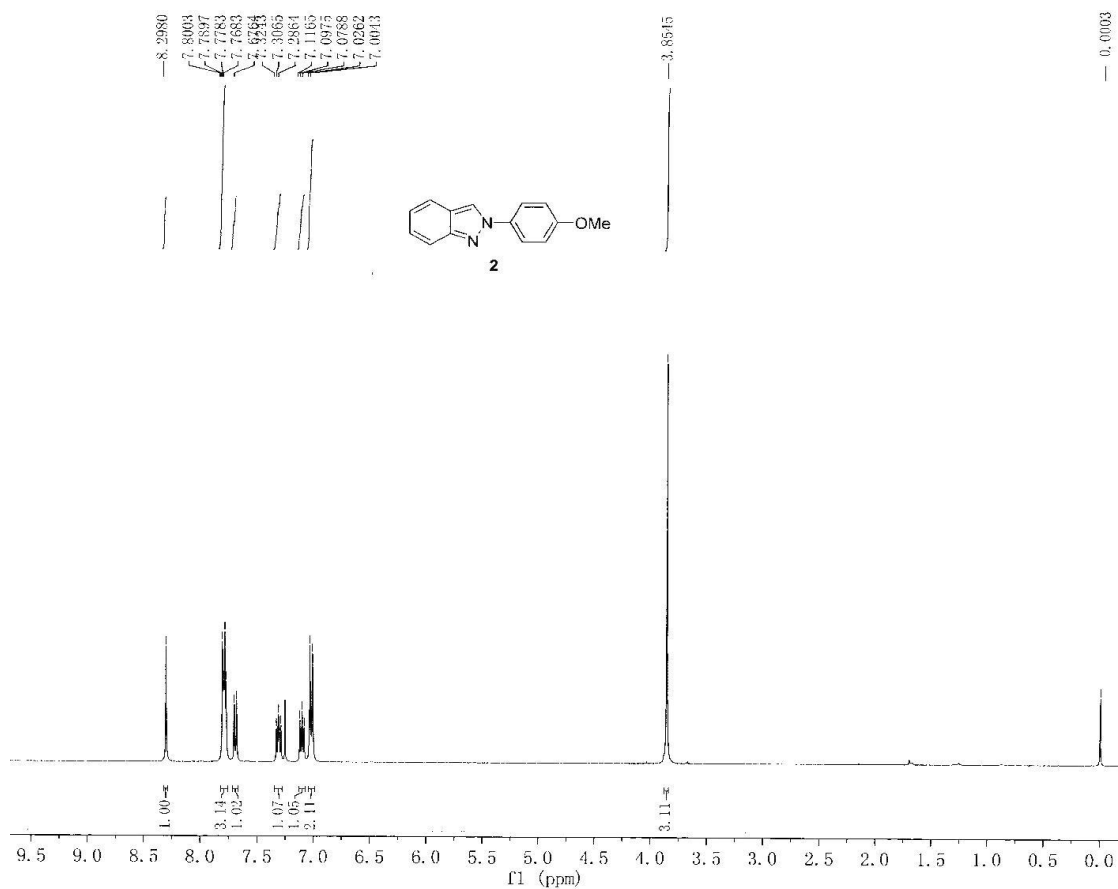

<sup>13</sup>C NMR

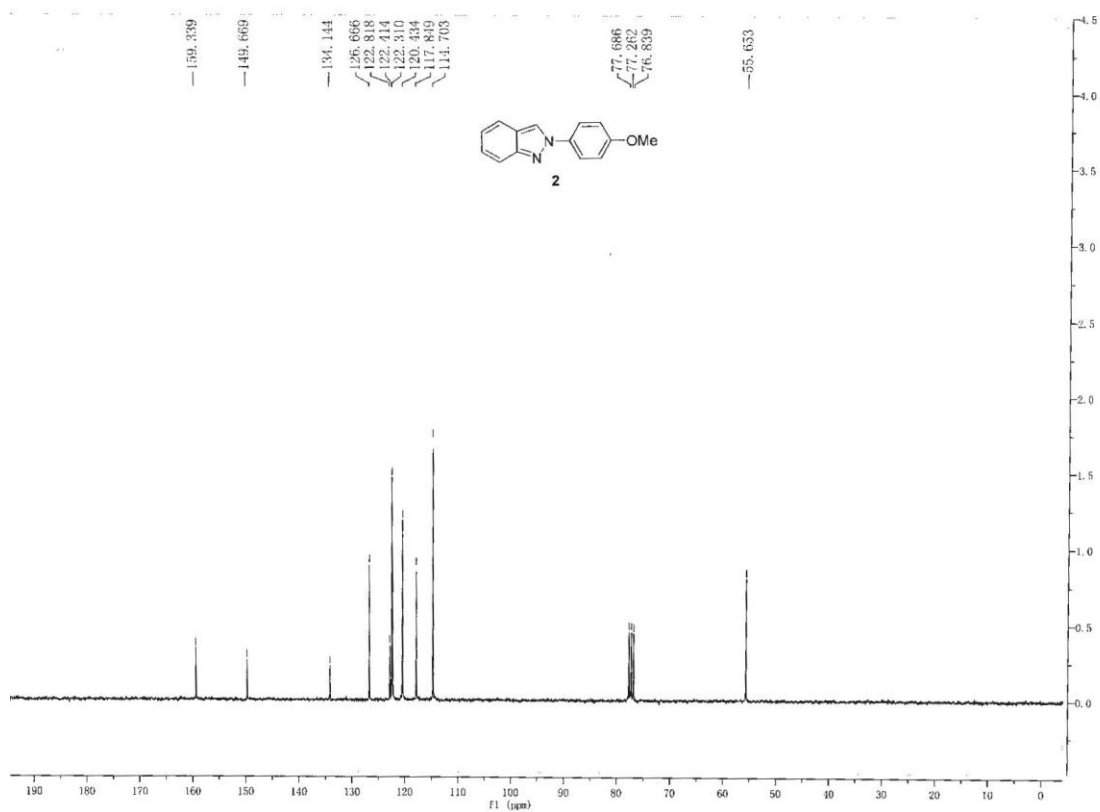

Supporting Information 2

<sup>1</sup>H NMR

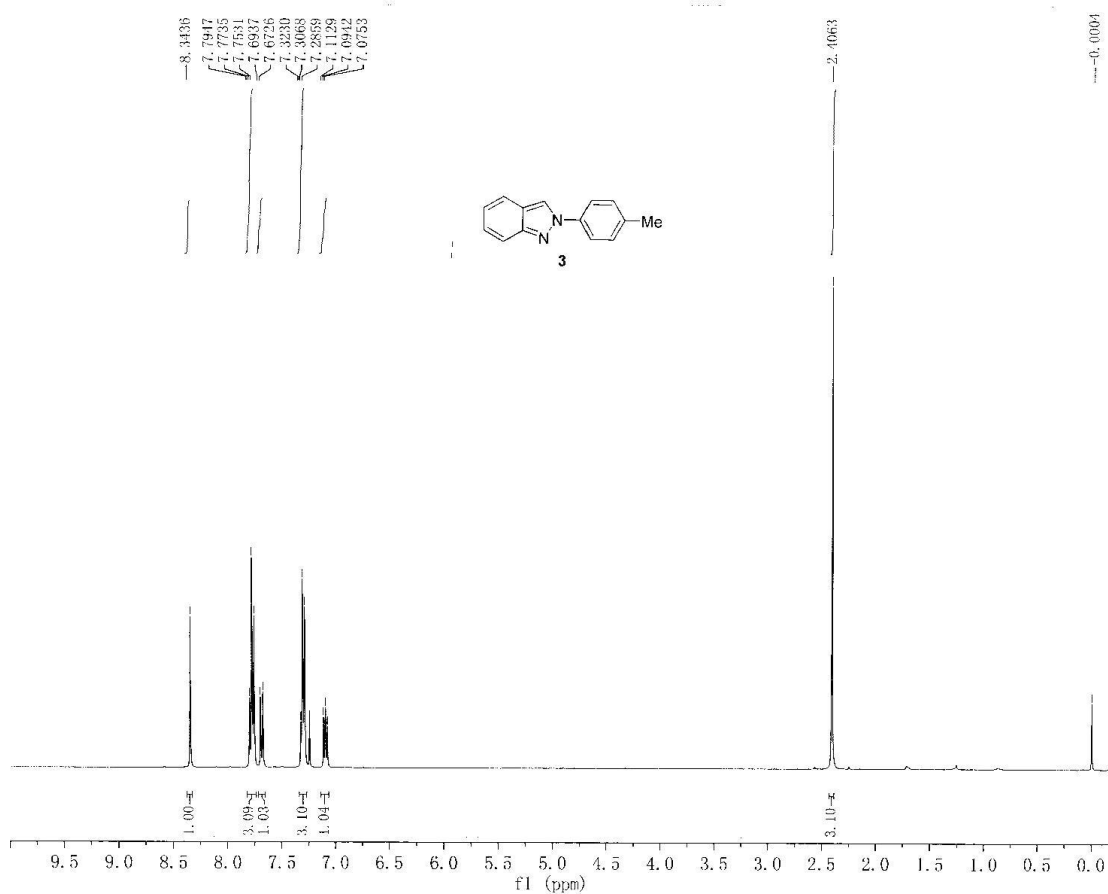

<sup>13</sup>C NMR

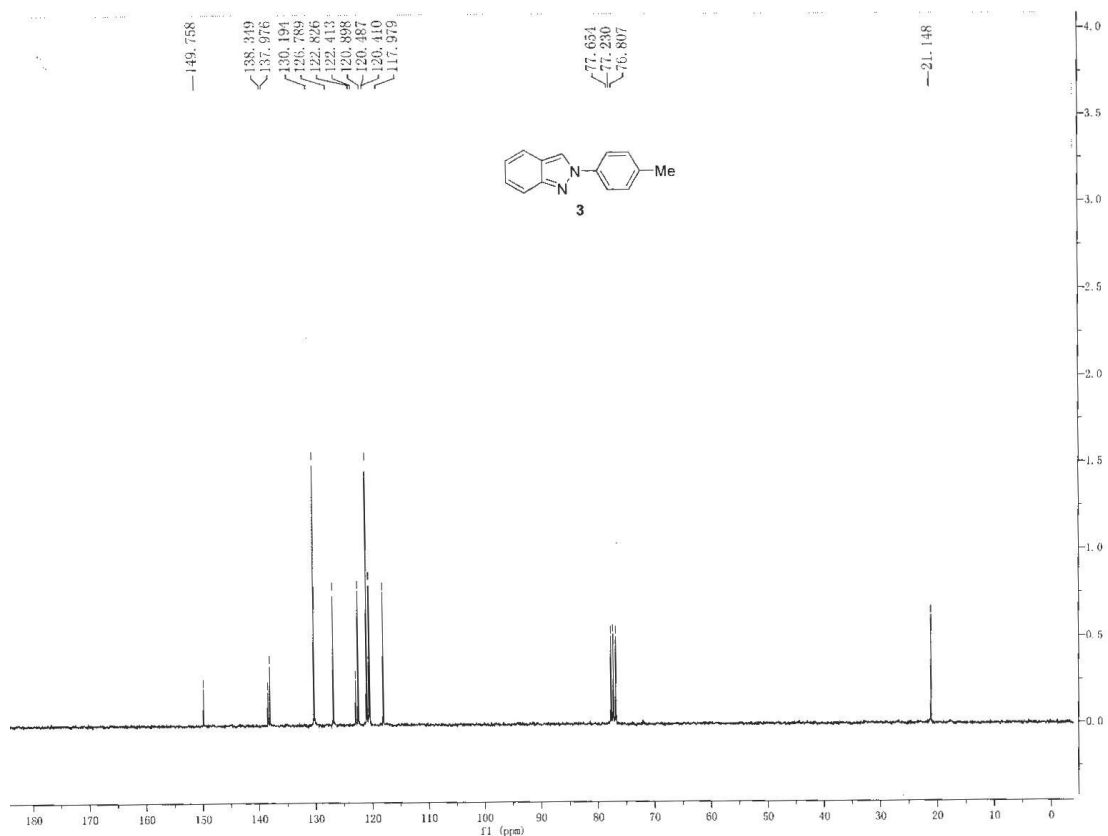

Supporting Information 2

<sup>1</sup>H NMR

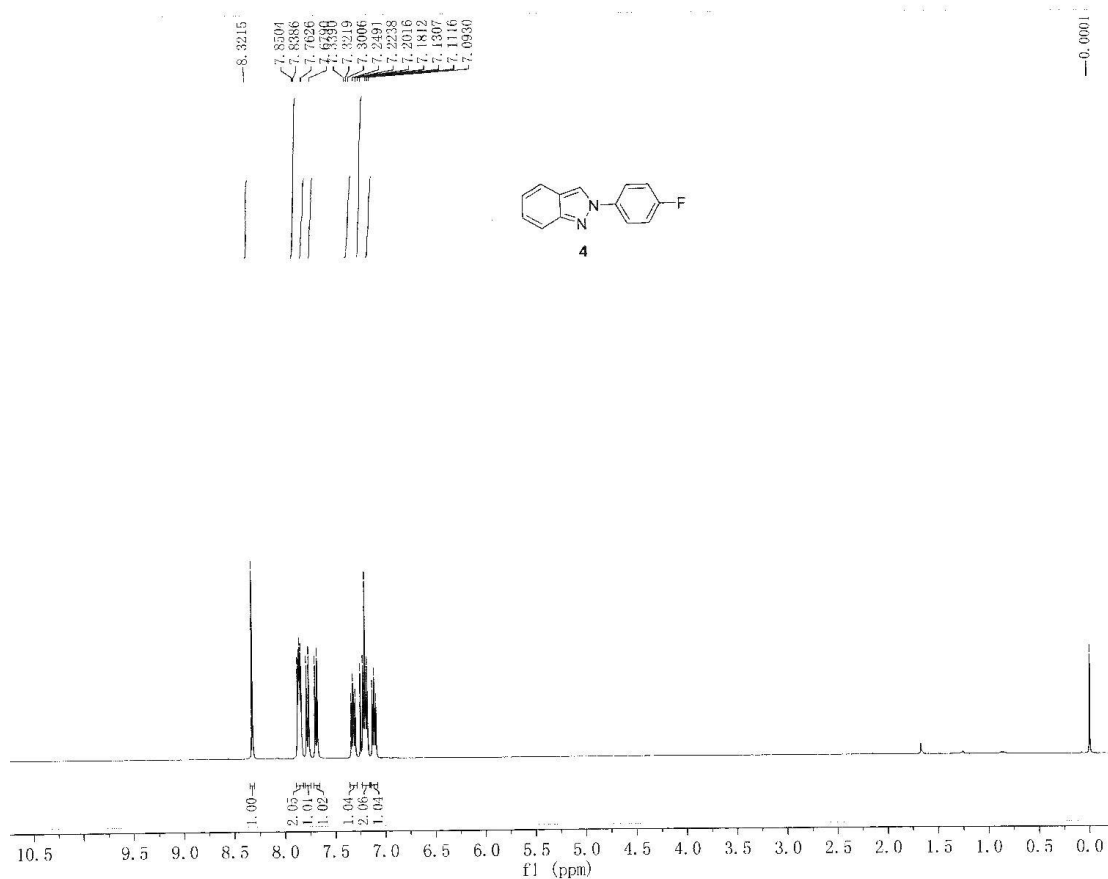

<sup>13</sup>C NMR

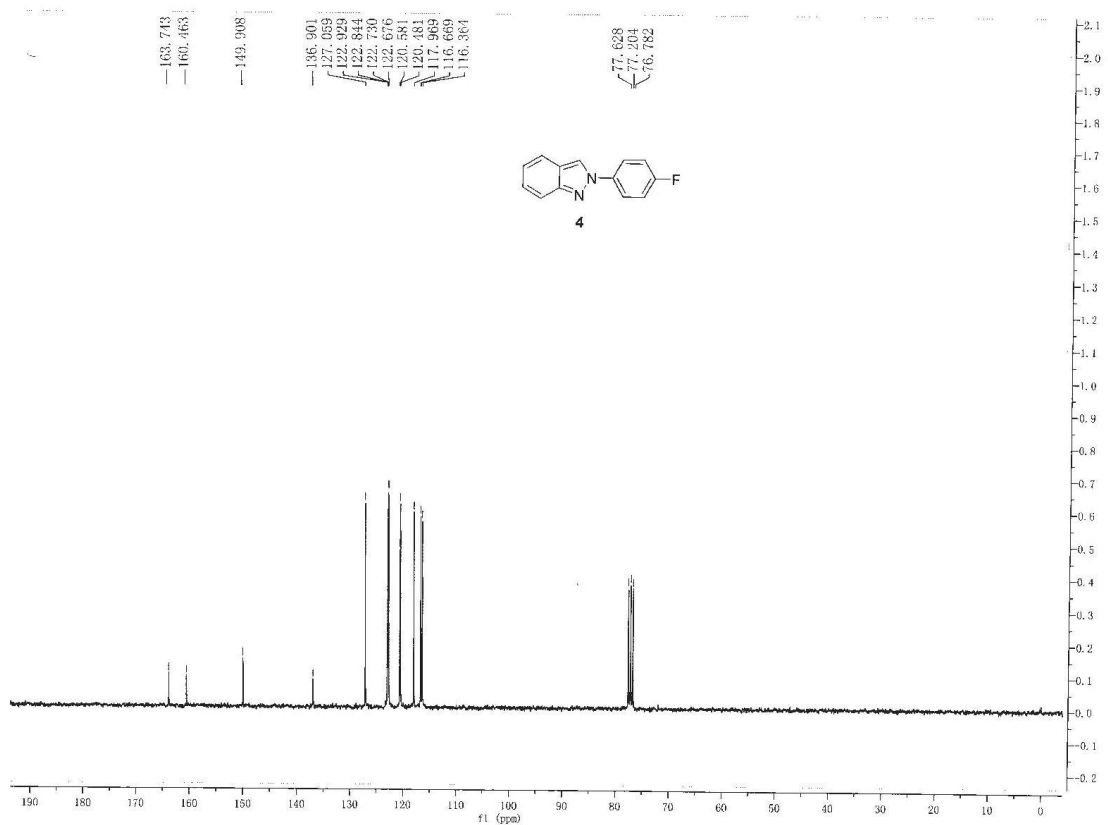

Supporting Information 2

<sup>1</sup>H NMR

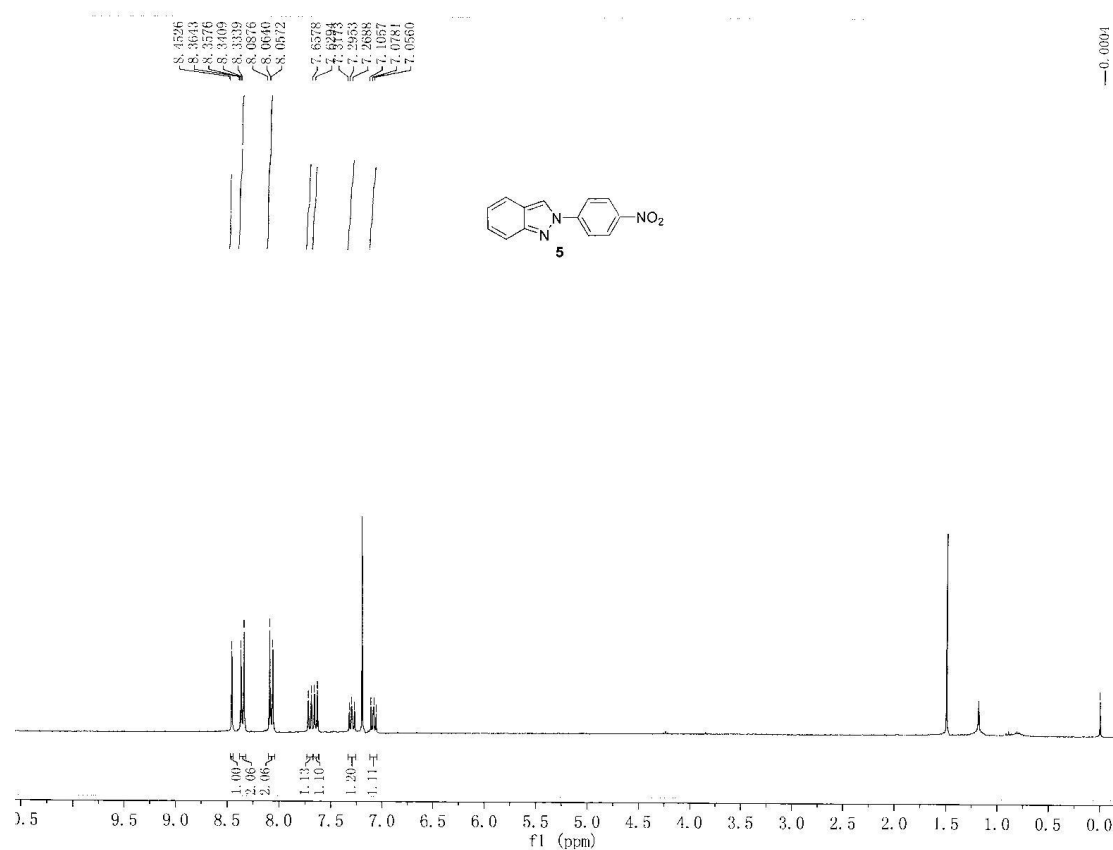

<sup>13</sup>C NMR

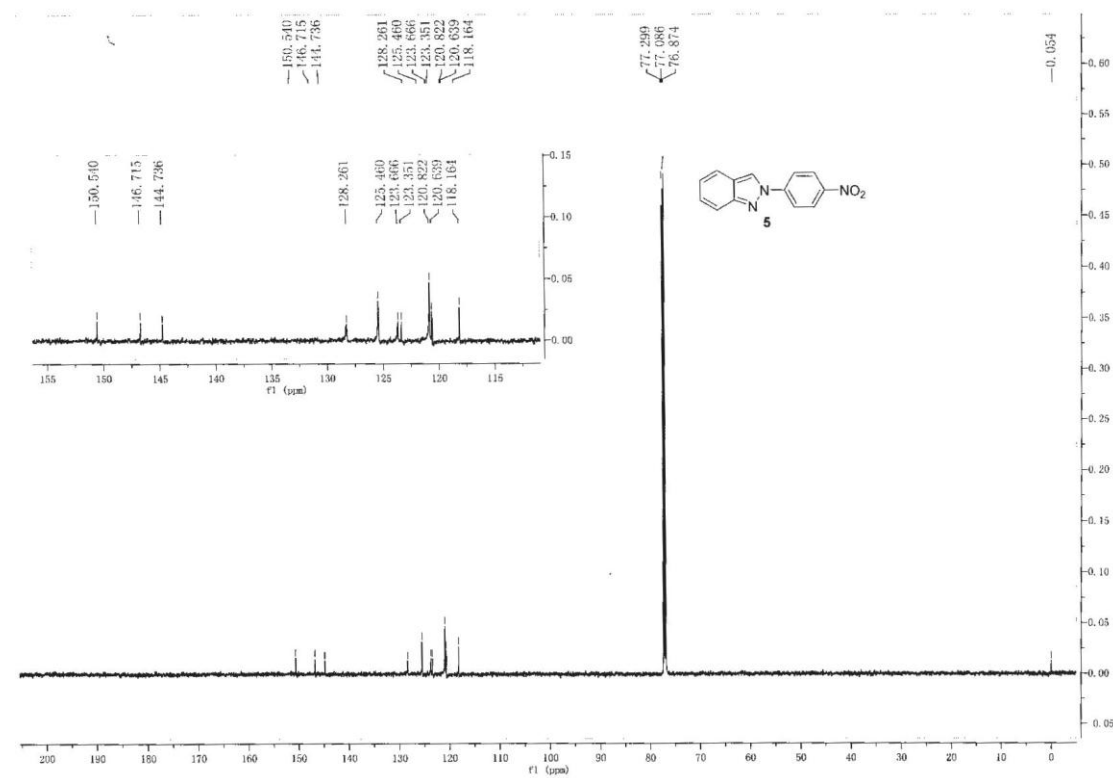

Supporting Information 2

<sup>1</sup>H NMR

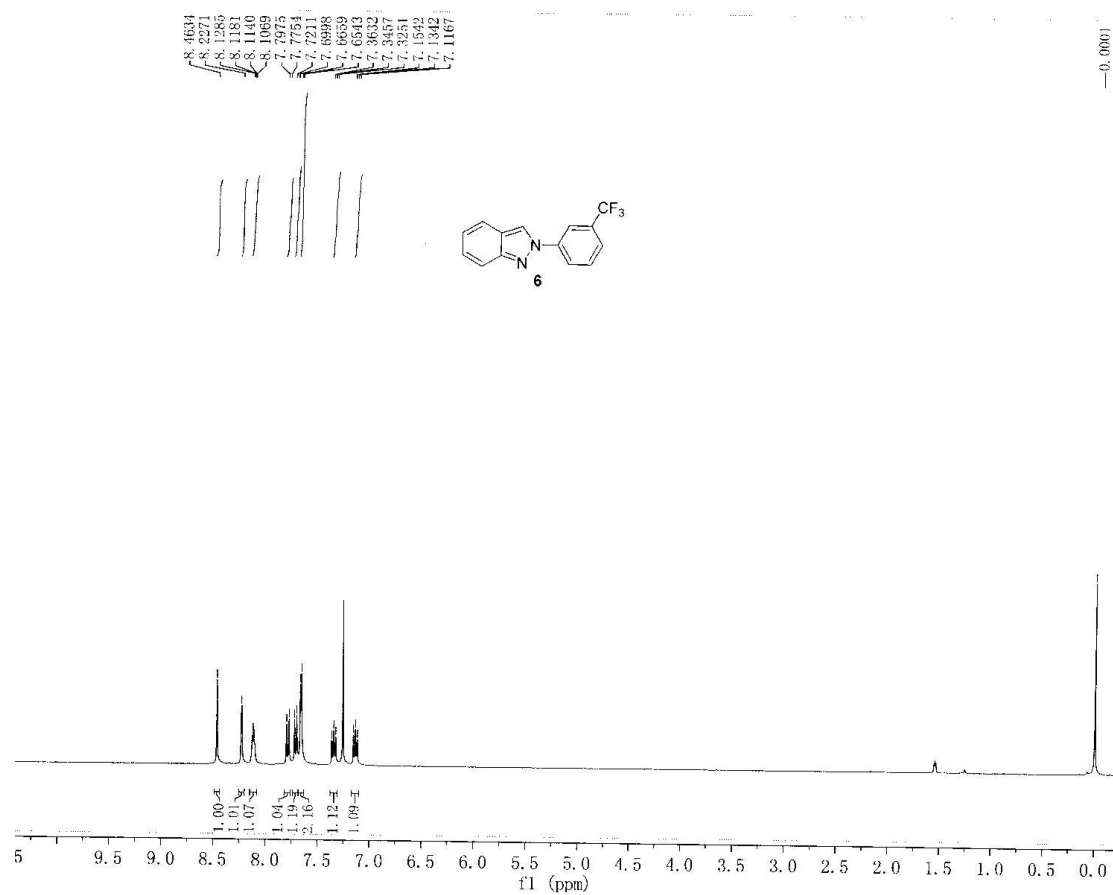

<sup>13</sup>C NMR

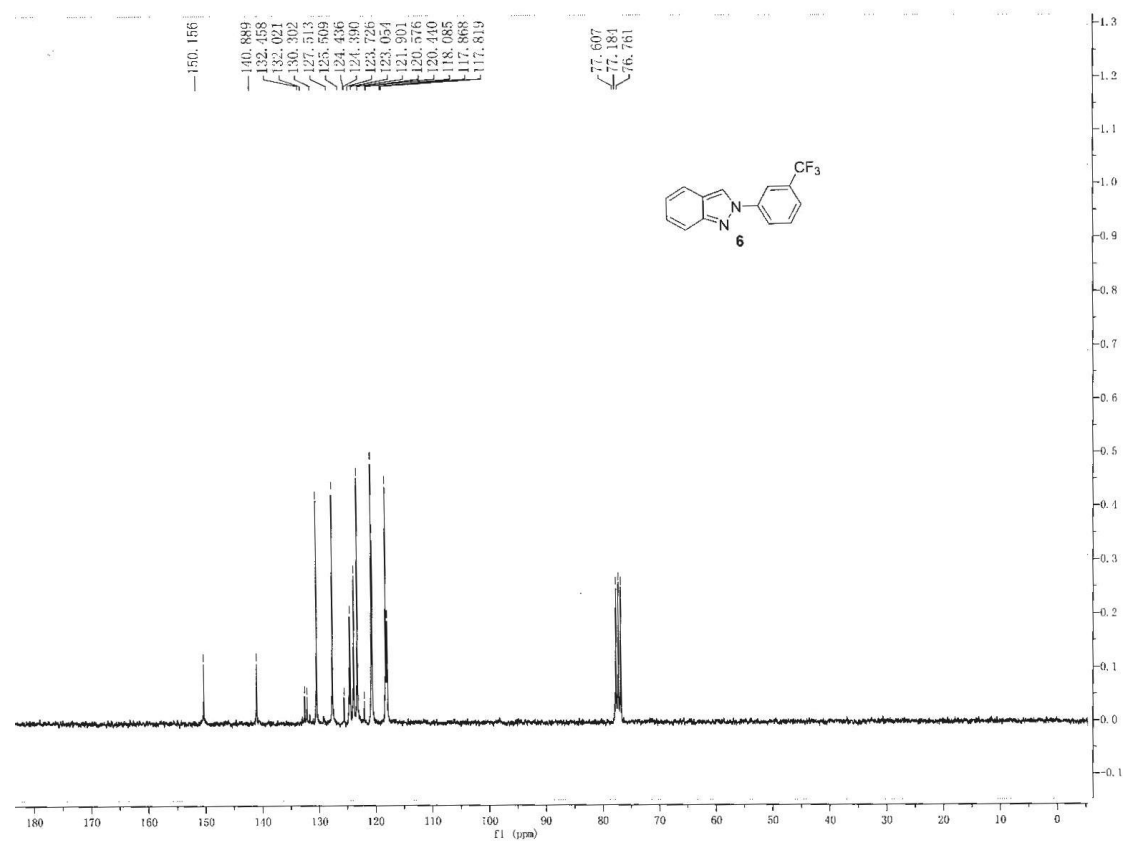

Supporting Information 2

<sup>1</sup>H NMR

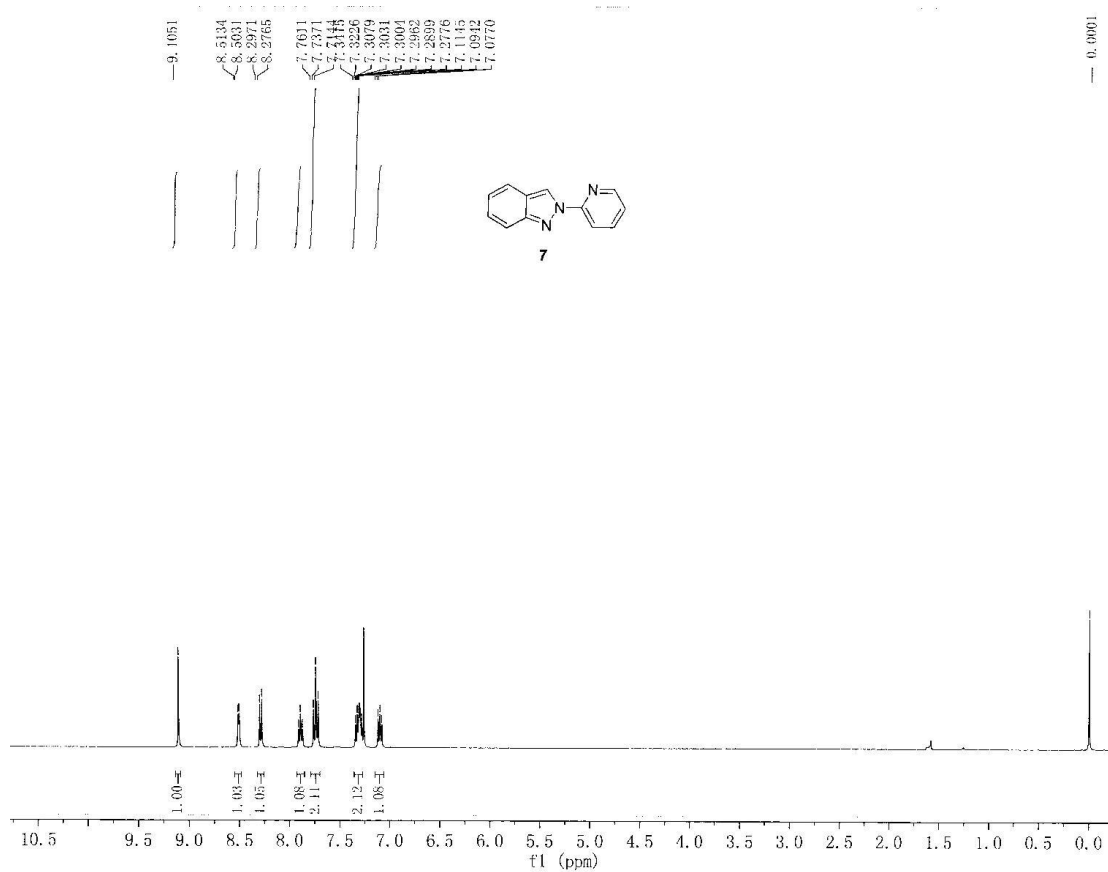

<sup>13</sup>C NMR

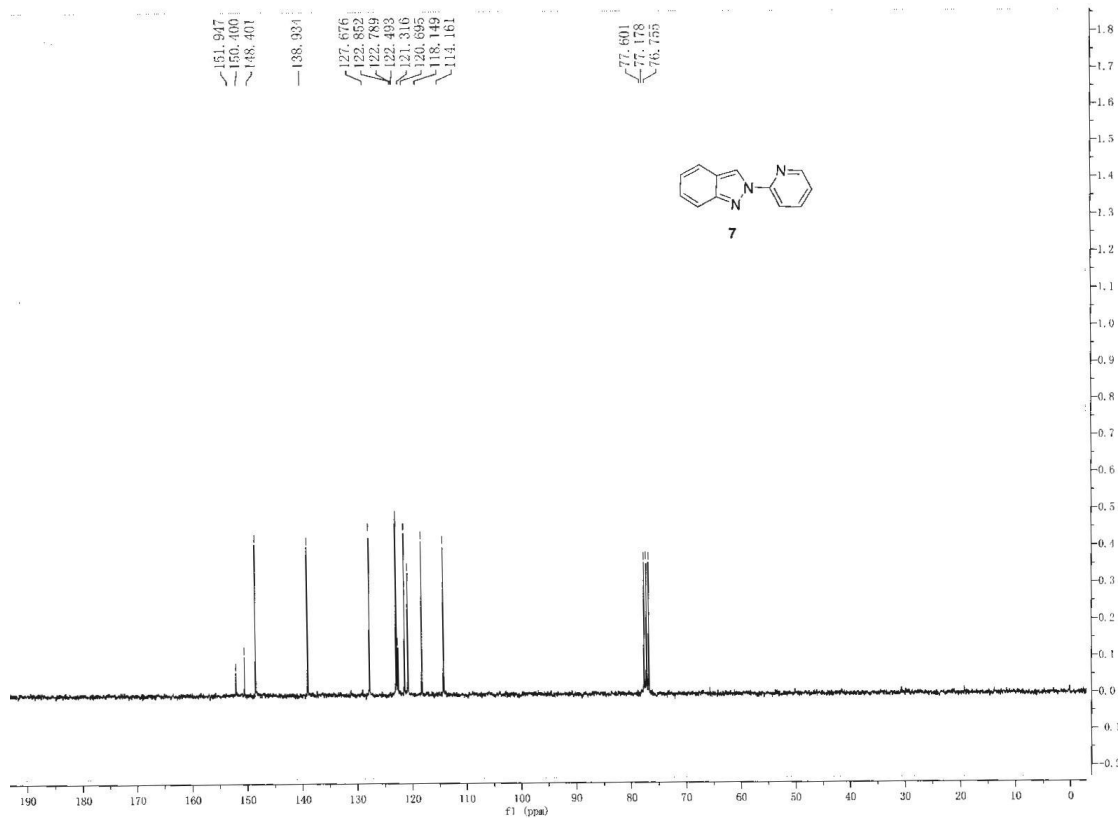

Supporting Information 2

<sup>1</sup>H NMR

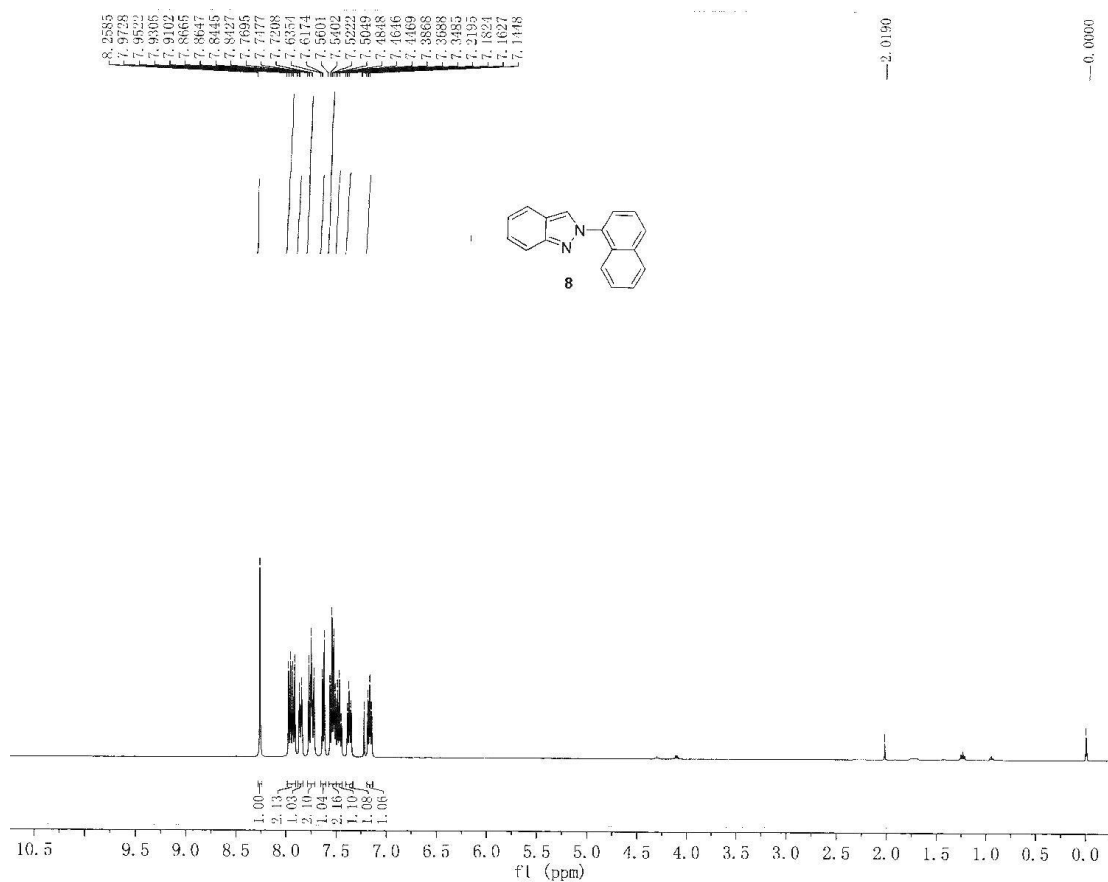

<sup>13</sup>C NMR

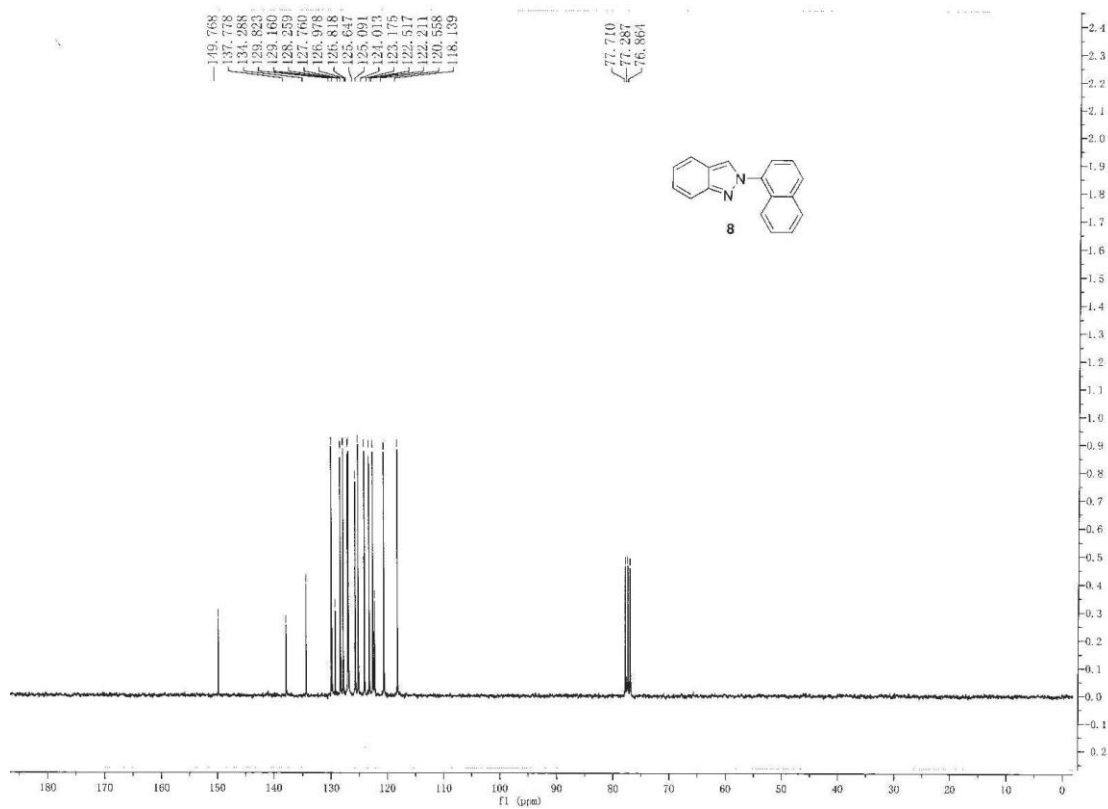

Supporting Information 2

<sup>1</sup>H NMR

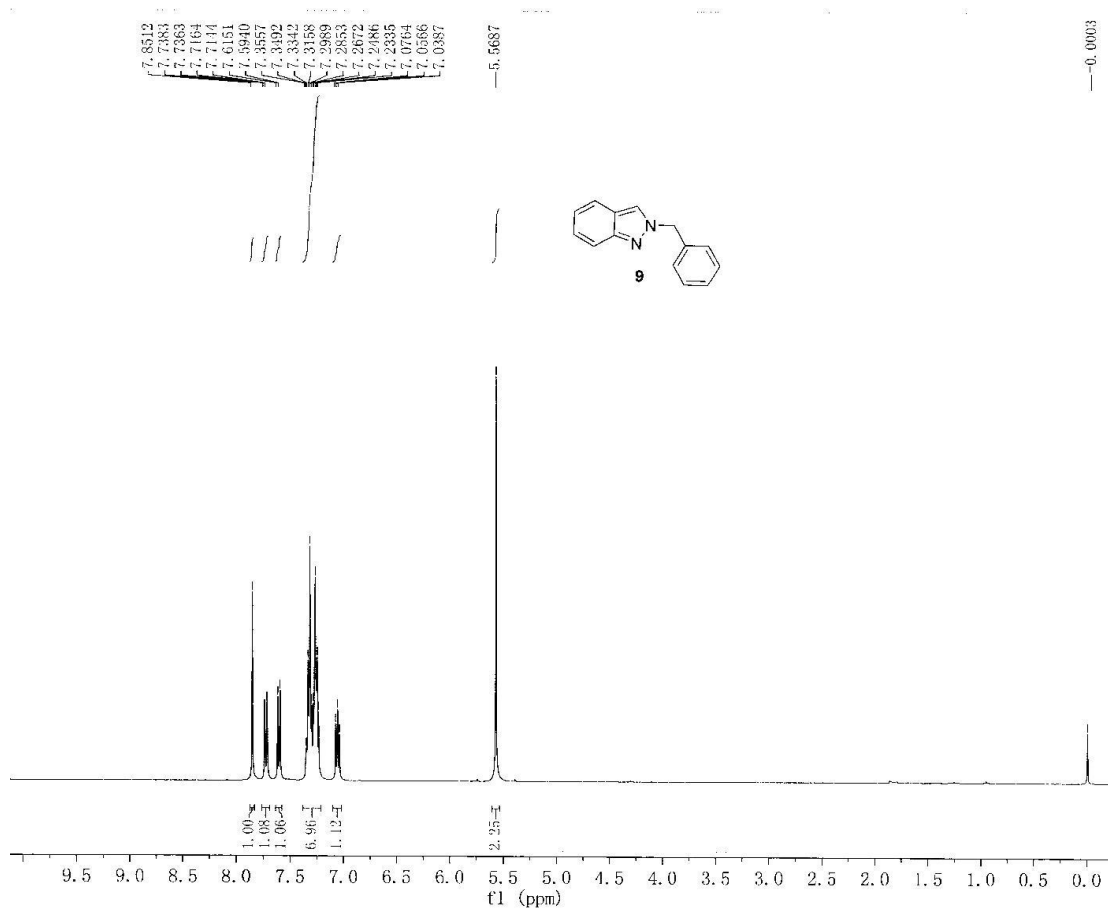

<sup>13</sup>C NMR

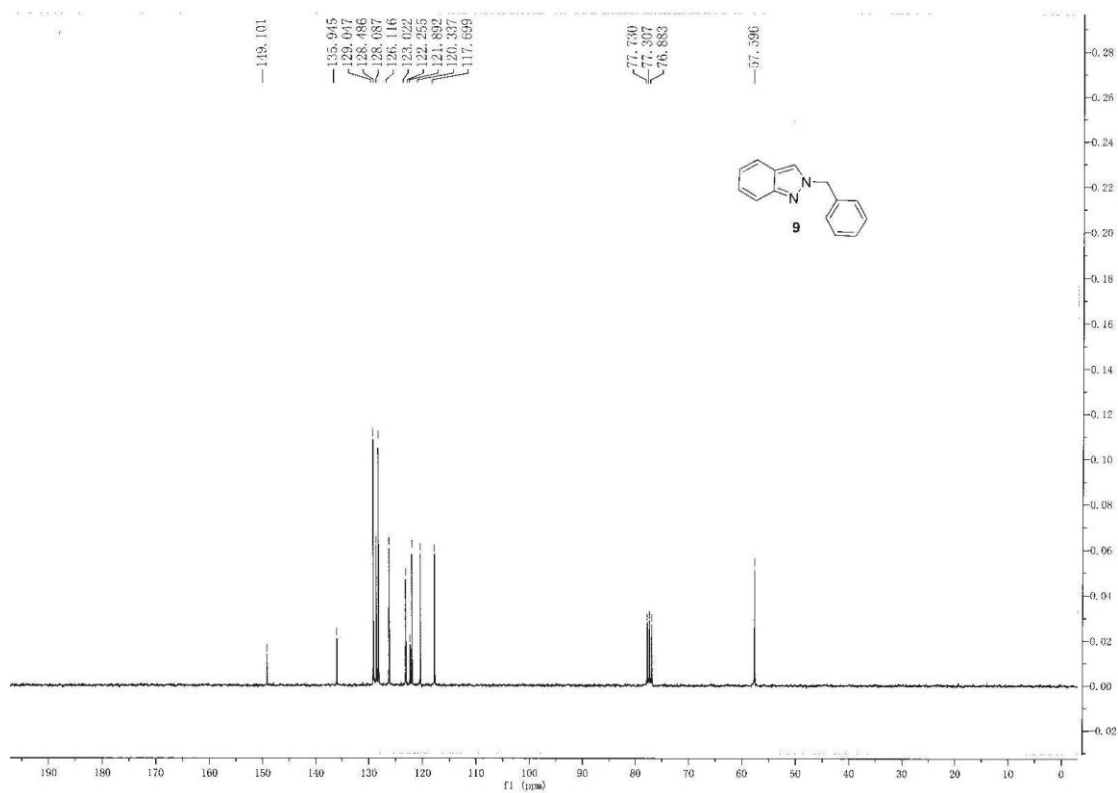



Supporting Information 2

<sup>1</sup>H NMR

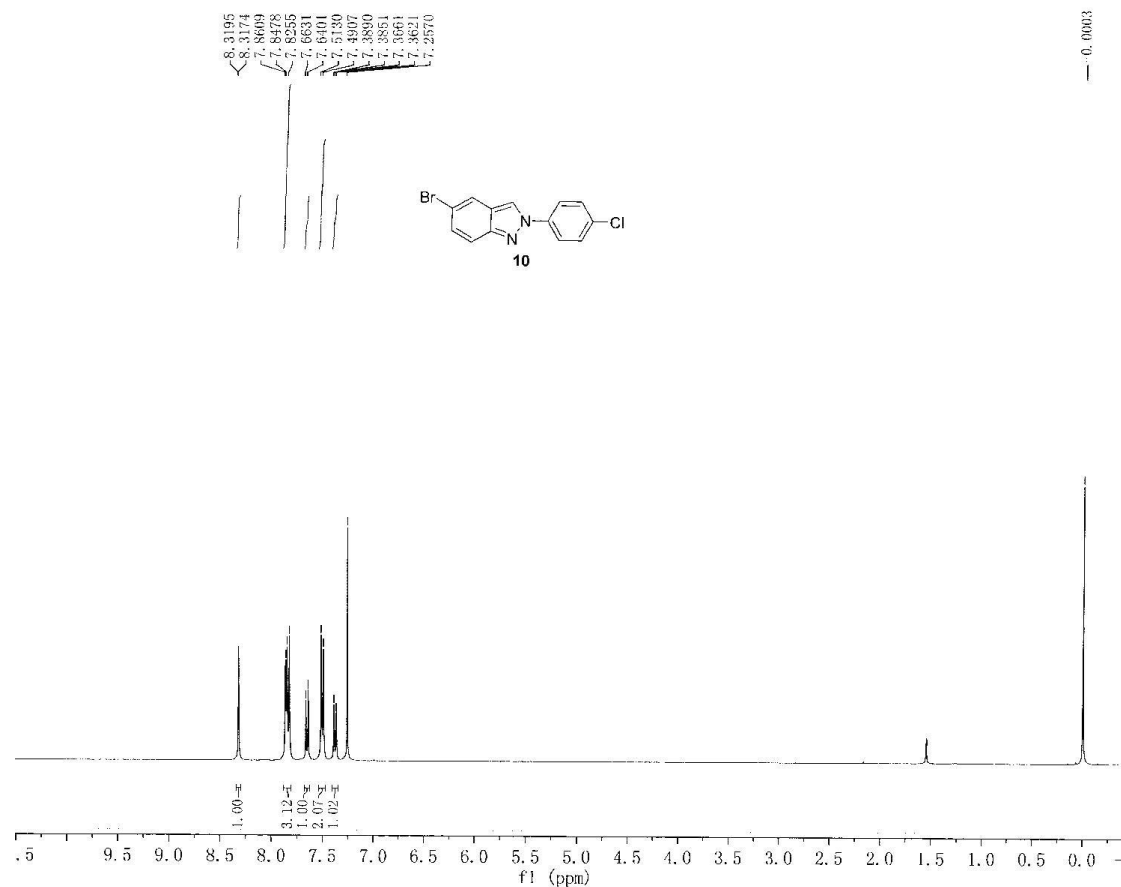

<sup>13</sup>C NMR

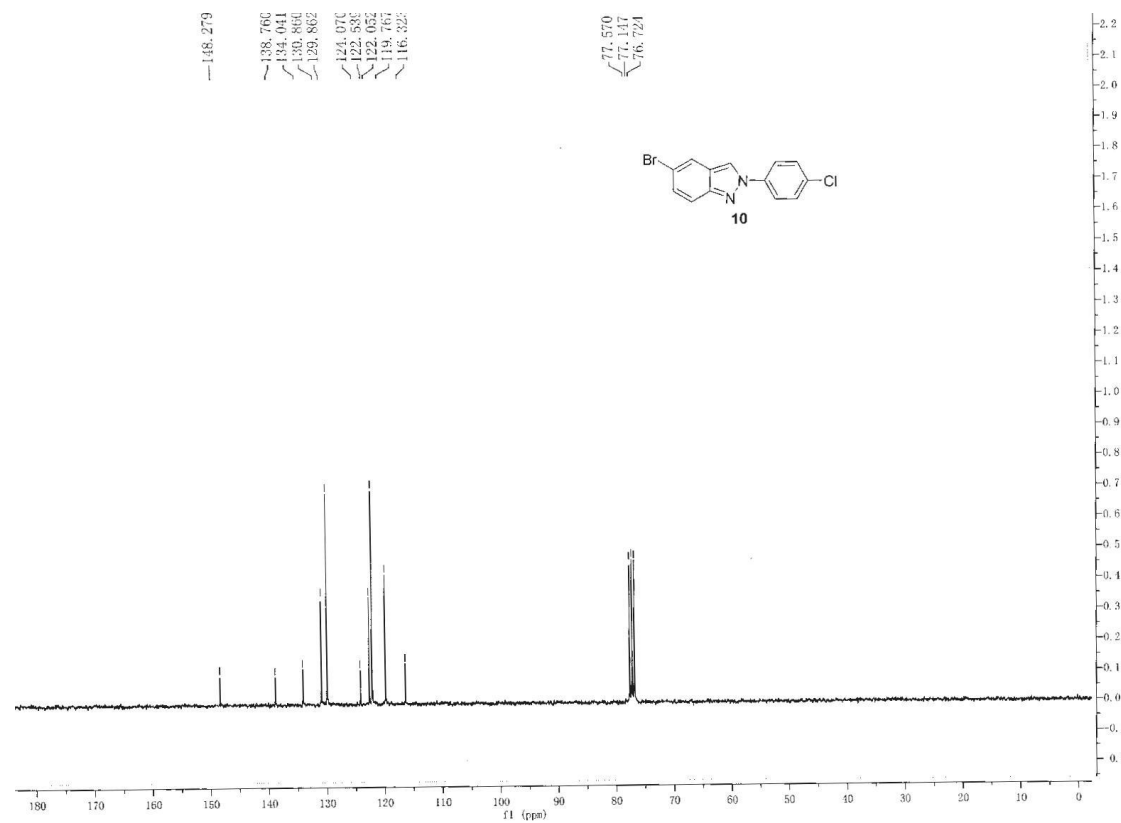

Supporting Information 2

<sup>1</sup>H NMR

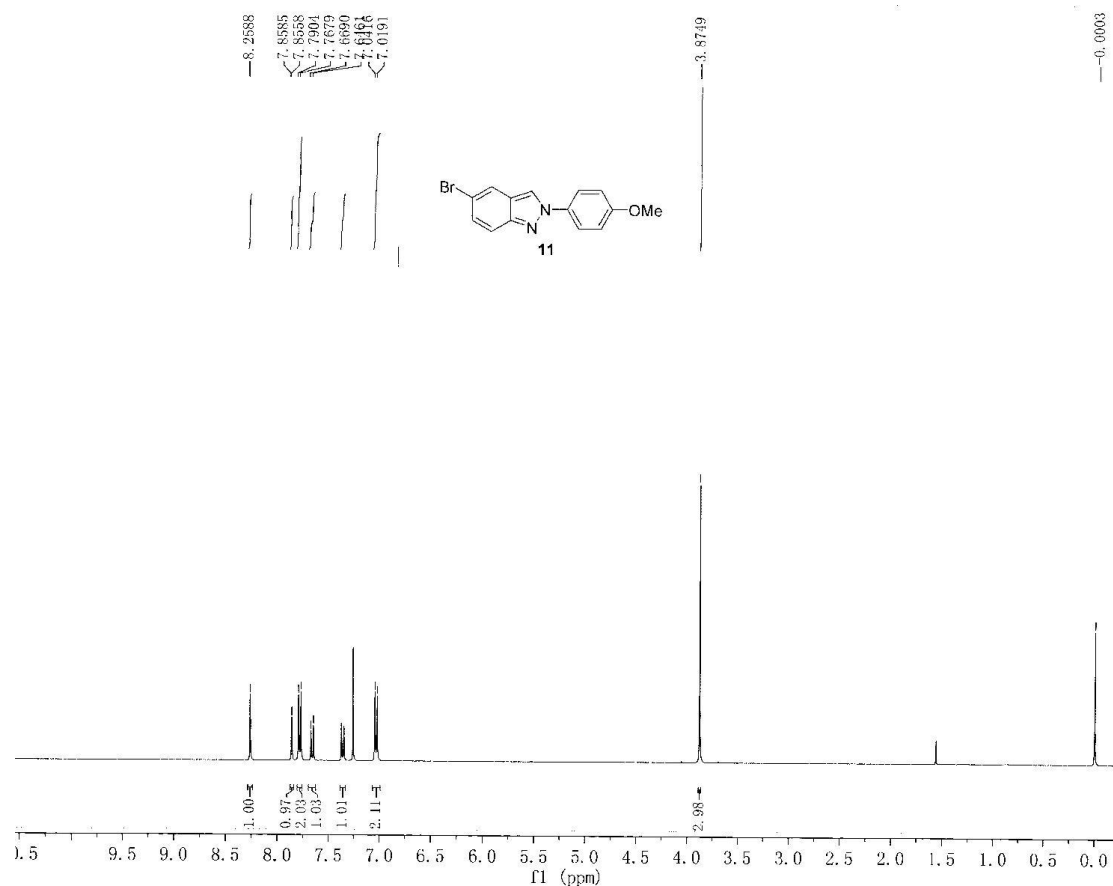

<sup>13</sup>C NMR

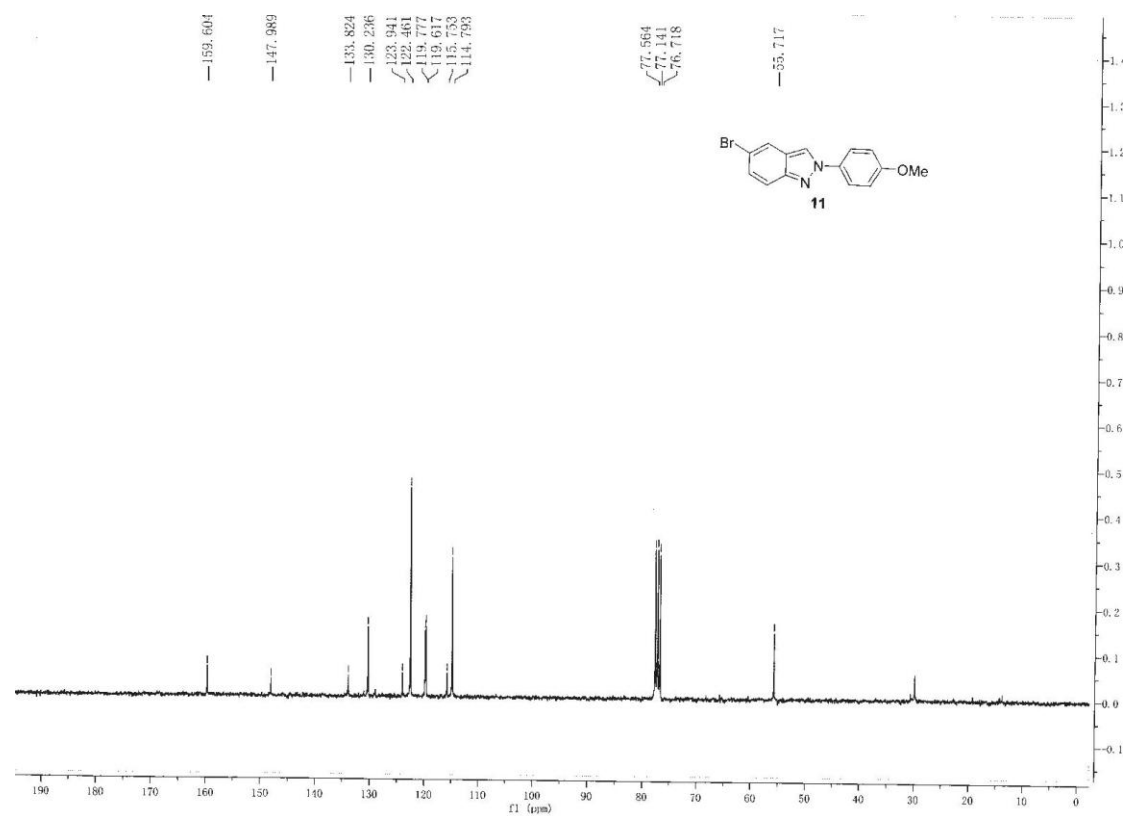

Supporting Information 2

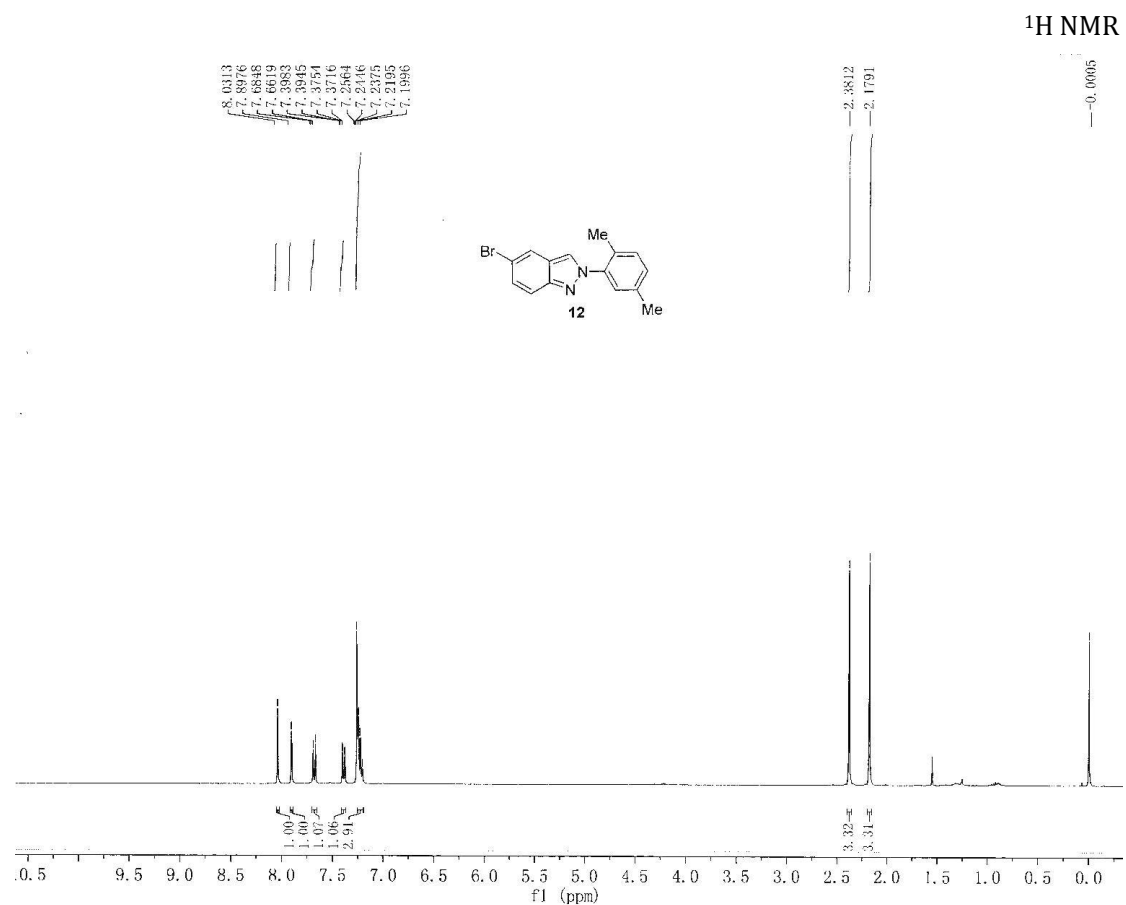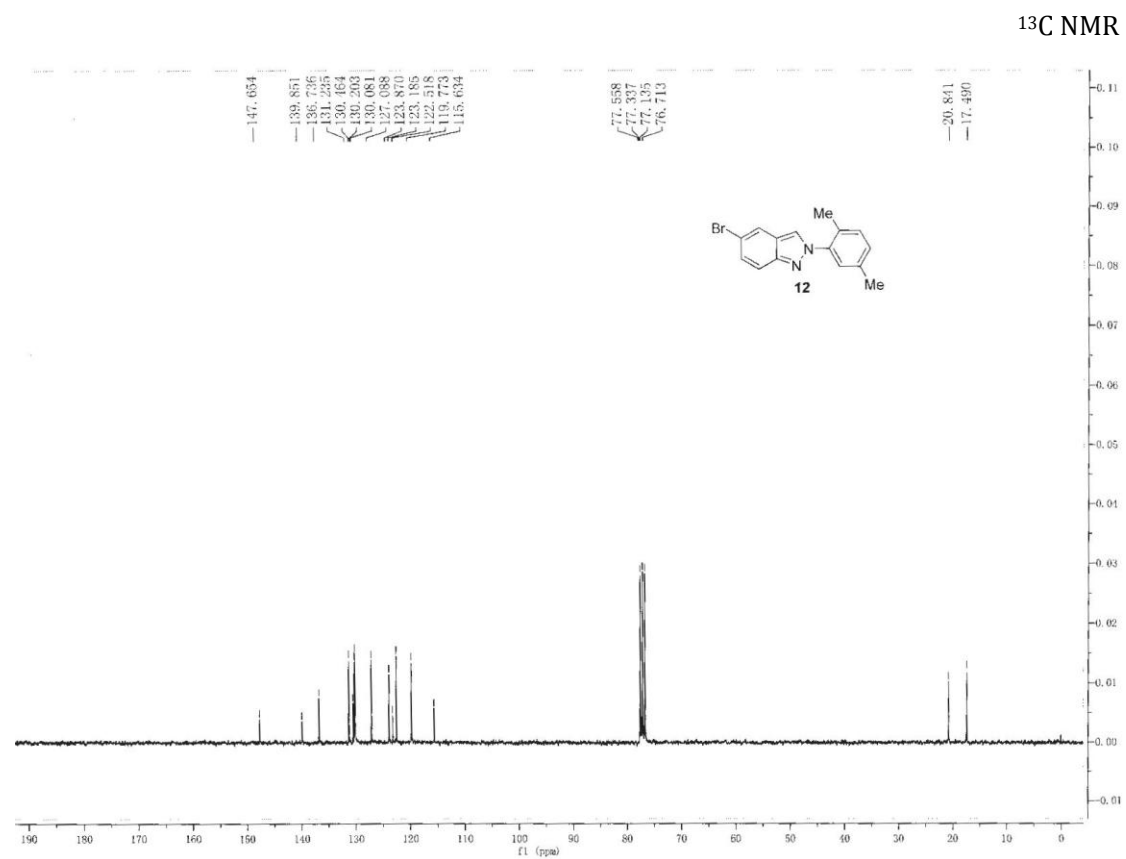

Supporting Information 2

<sup>1</sup>H NMR

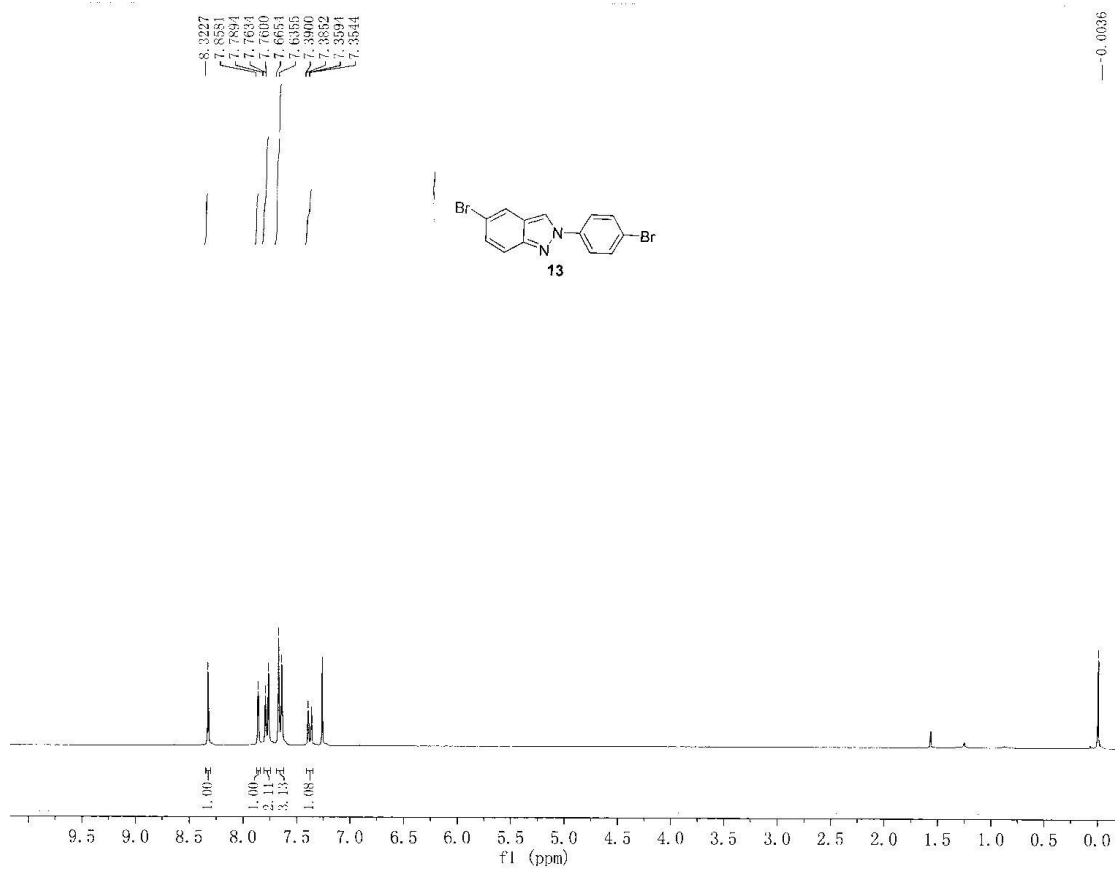

<sup>13</sup>C NMR

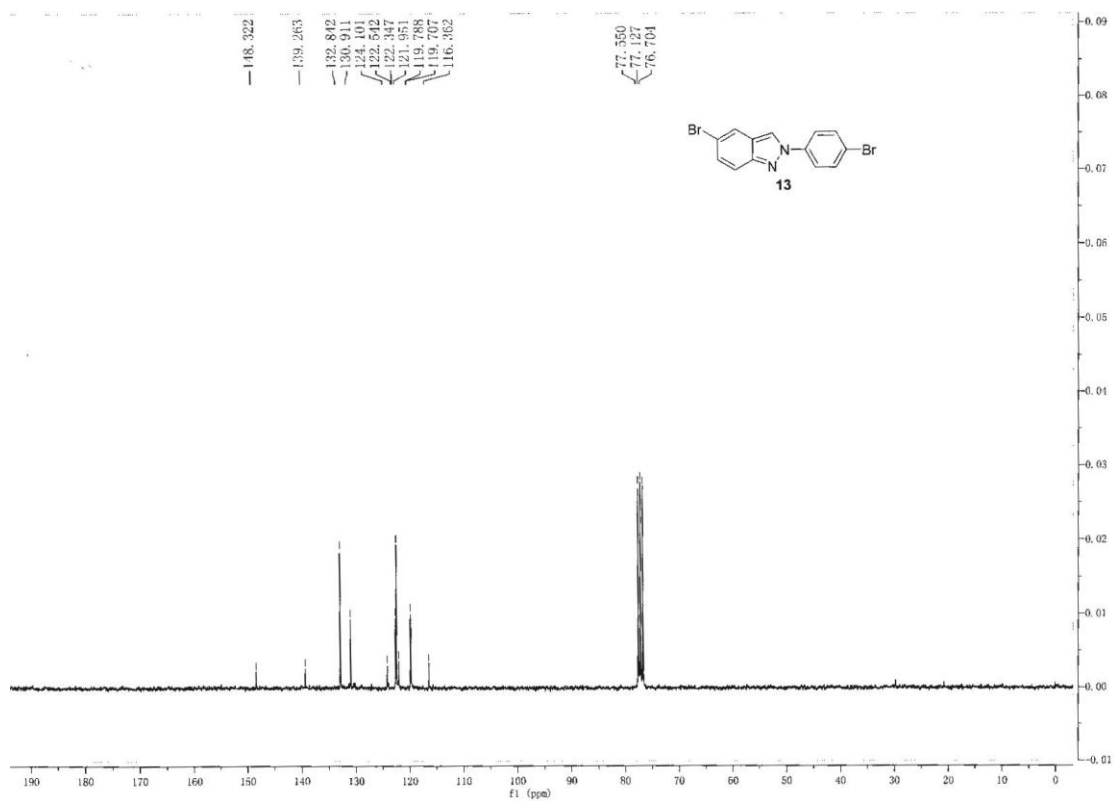

Supporting Information 2

<sup>1</sup>H NMR

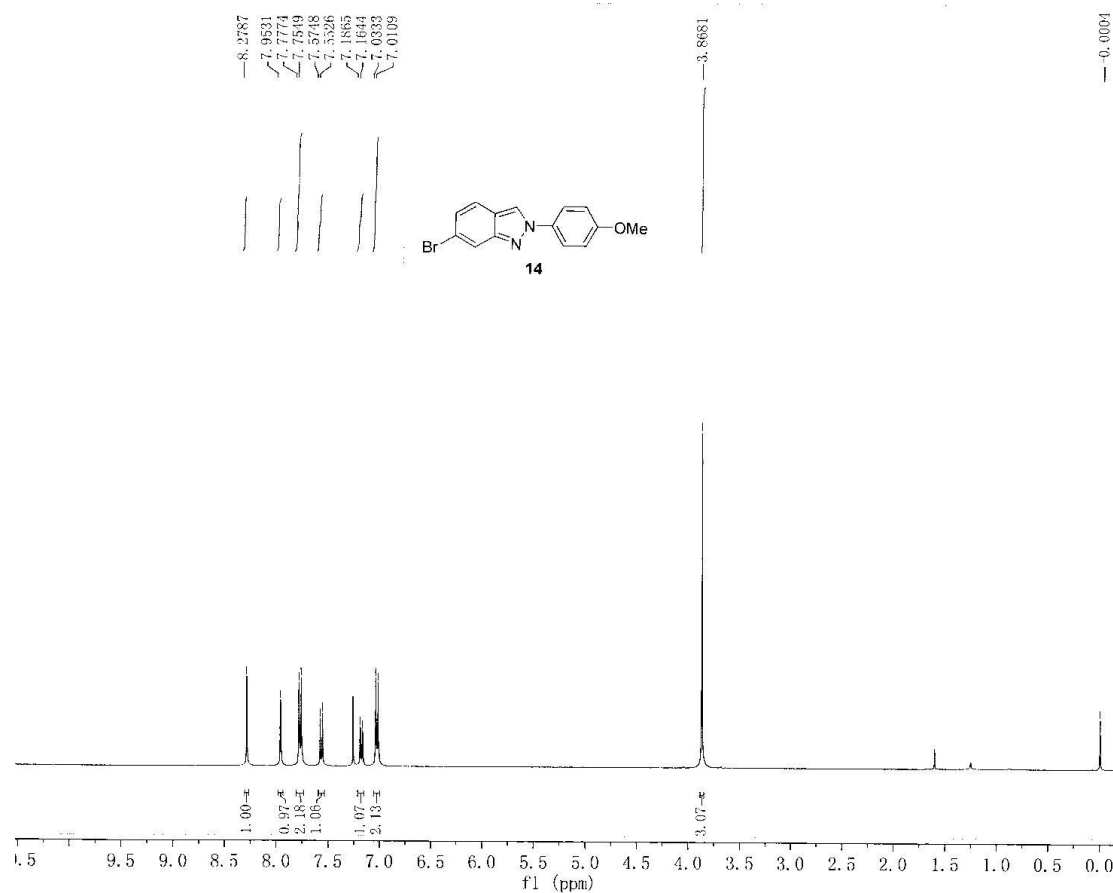

<sup>13</sup>C NMR

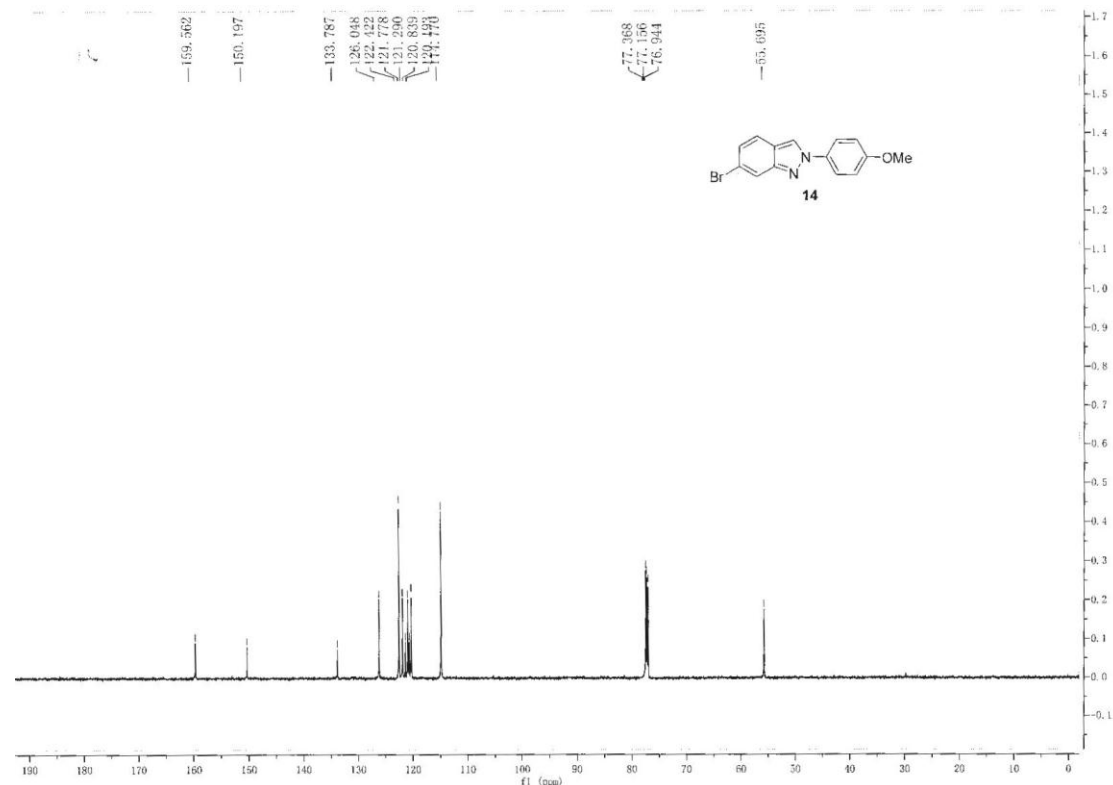

Supporting Information 2

<sup>1</sup>H NMR

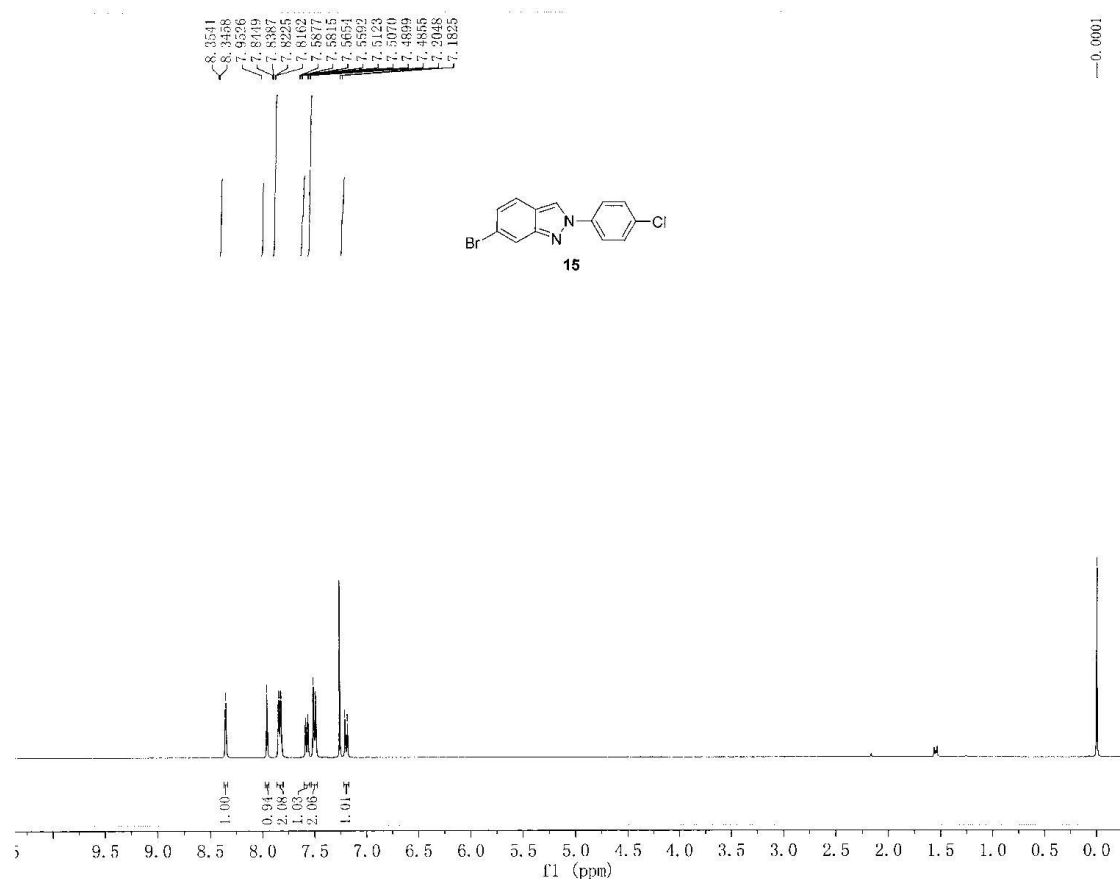

<sup>13</sup>C NMR

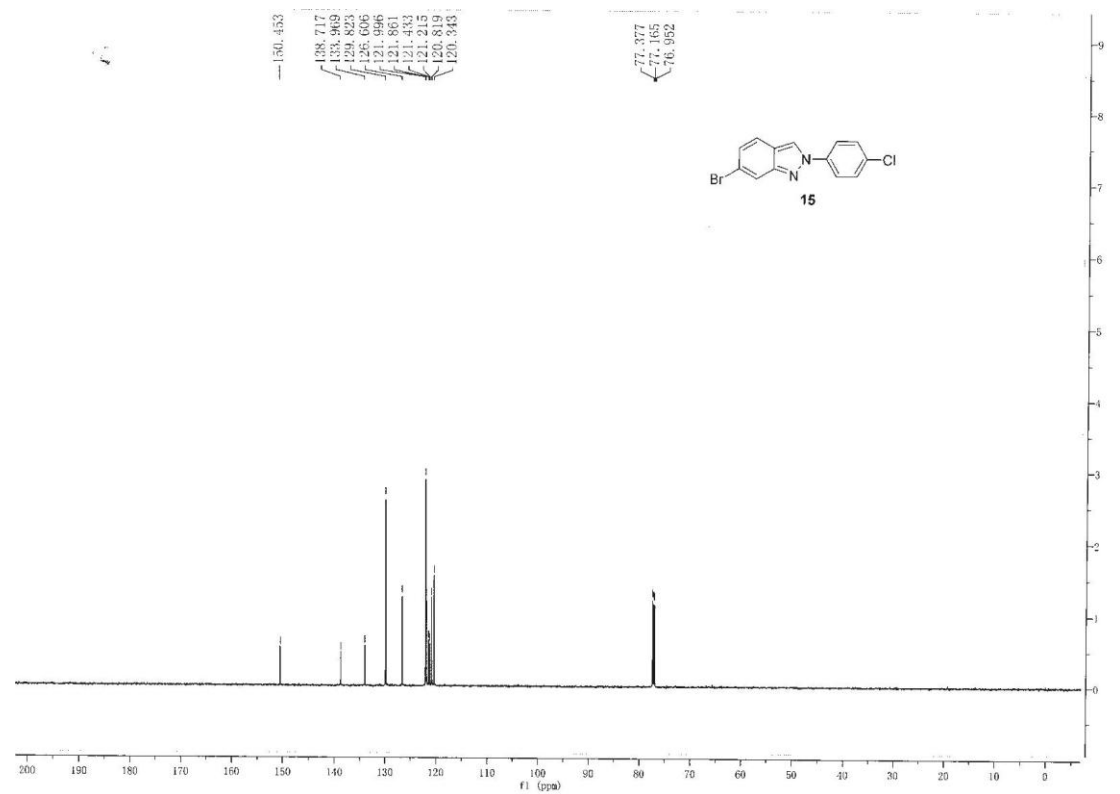

Supporting Information 2

<sup>1</sup>H NMR

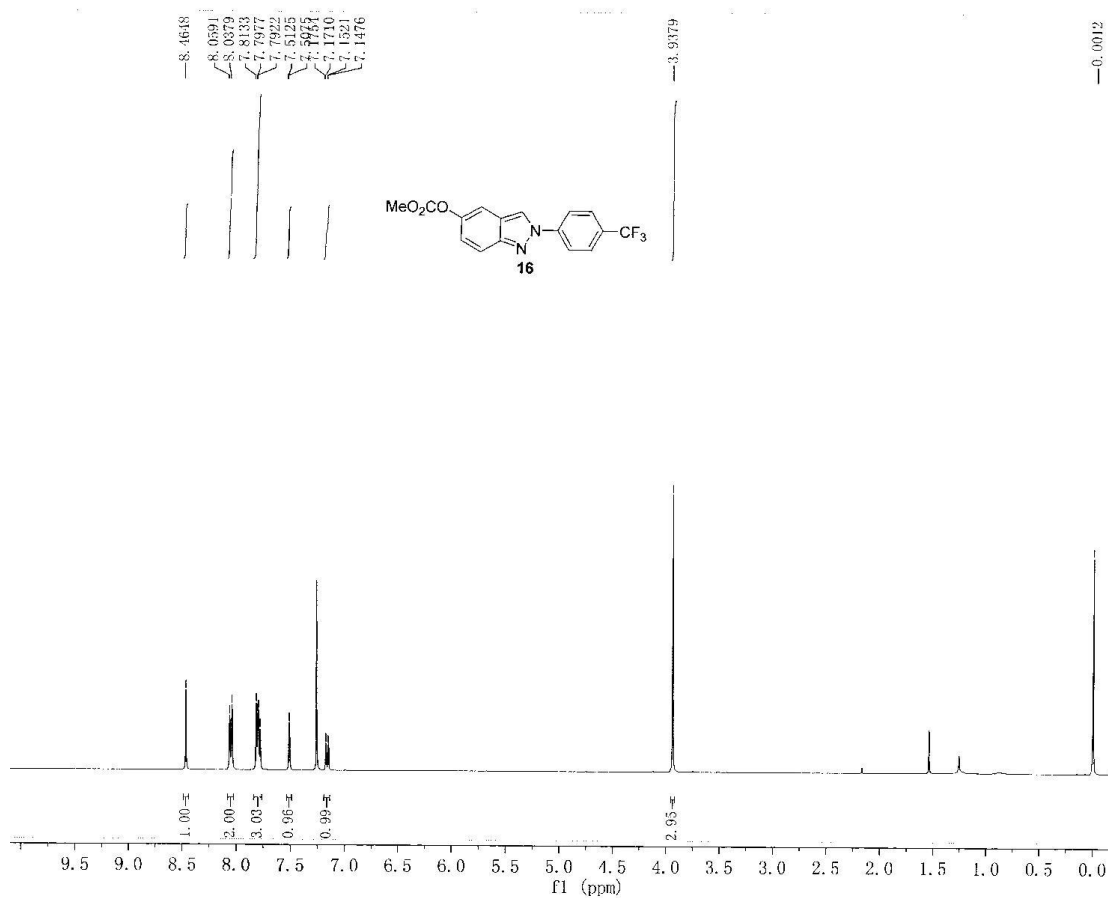

<sup>13</sup>C NMR

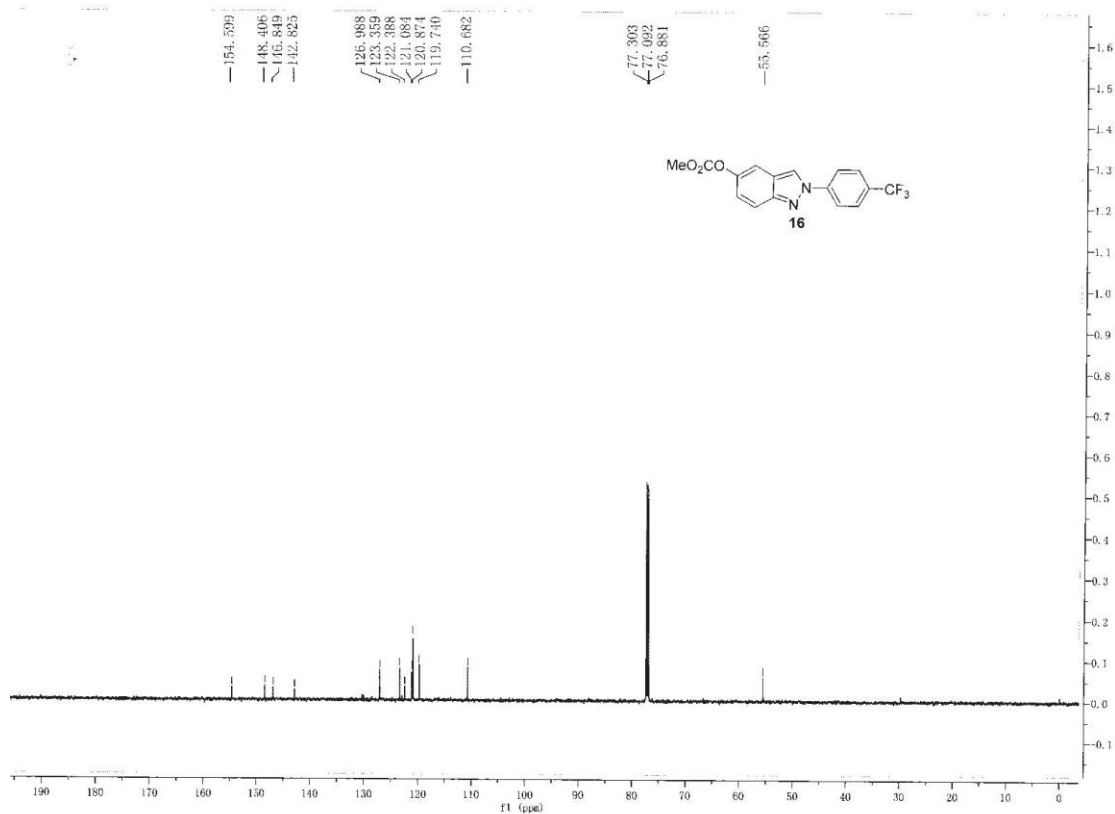

Supporting Information 2

<sup>1</sup>H NMR

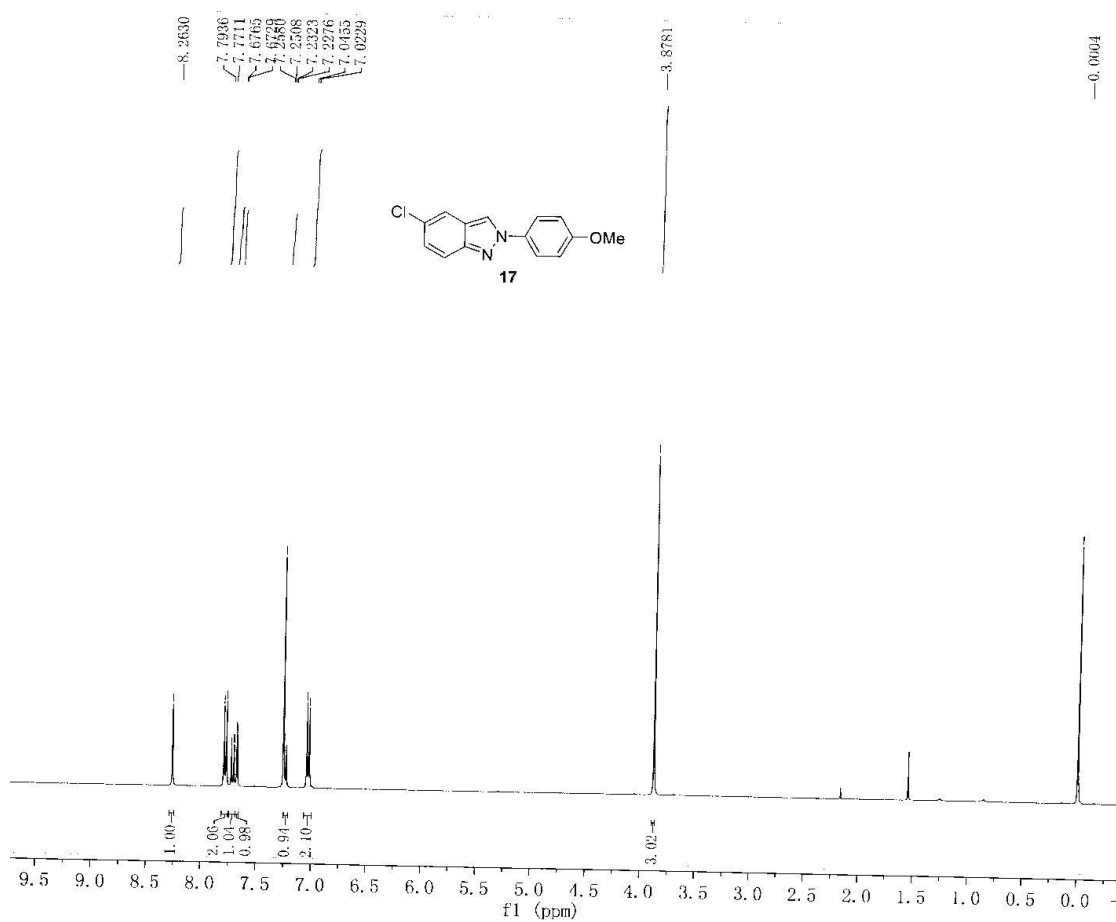

<sup>13</sup>C NMR

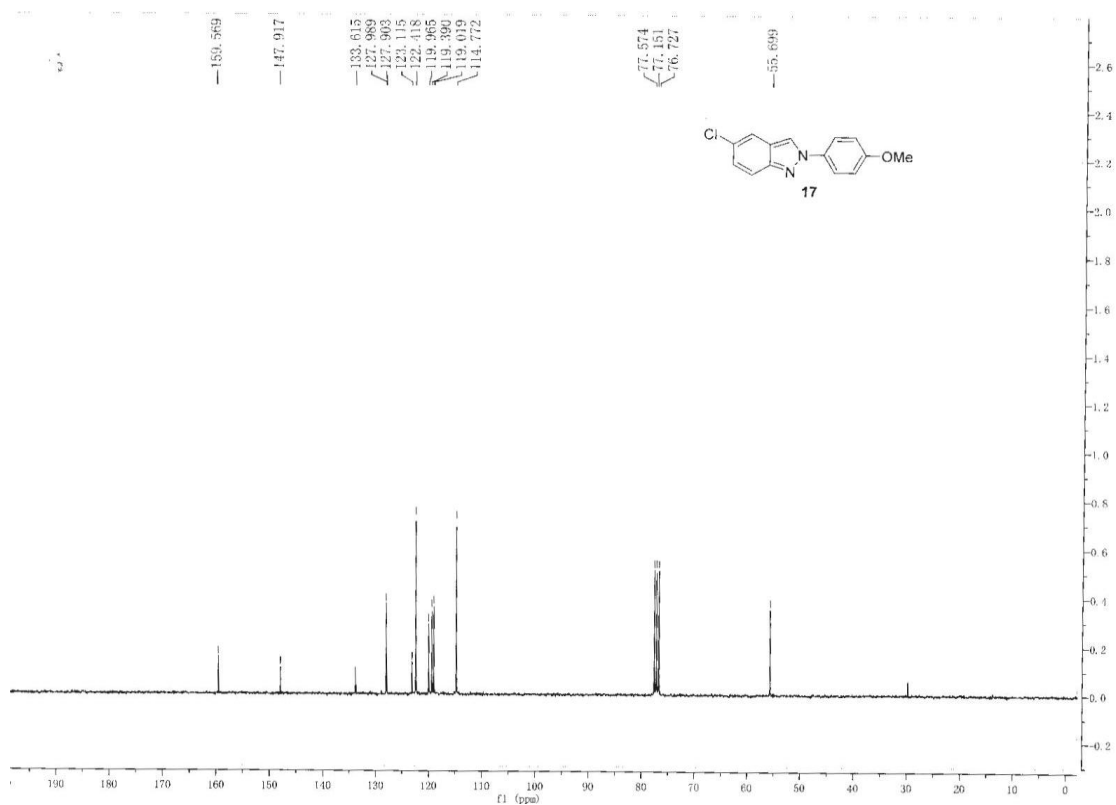



Supporting Information 2

<sup>1</sup>H NMR

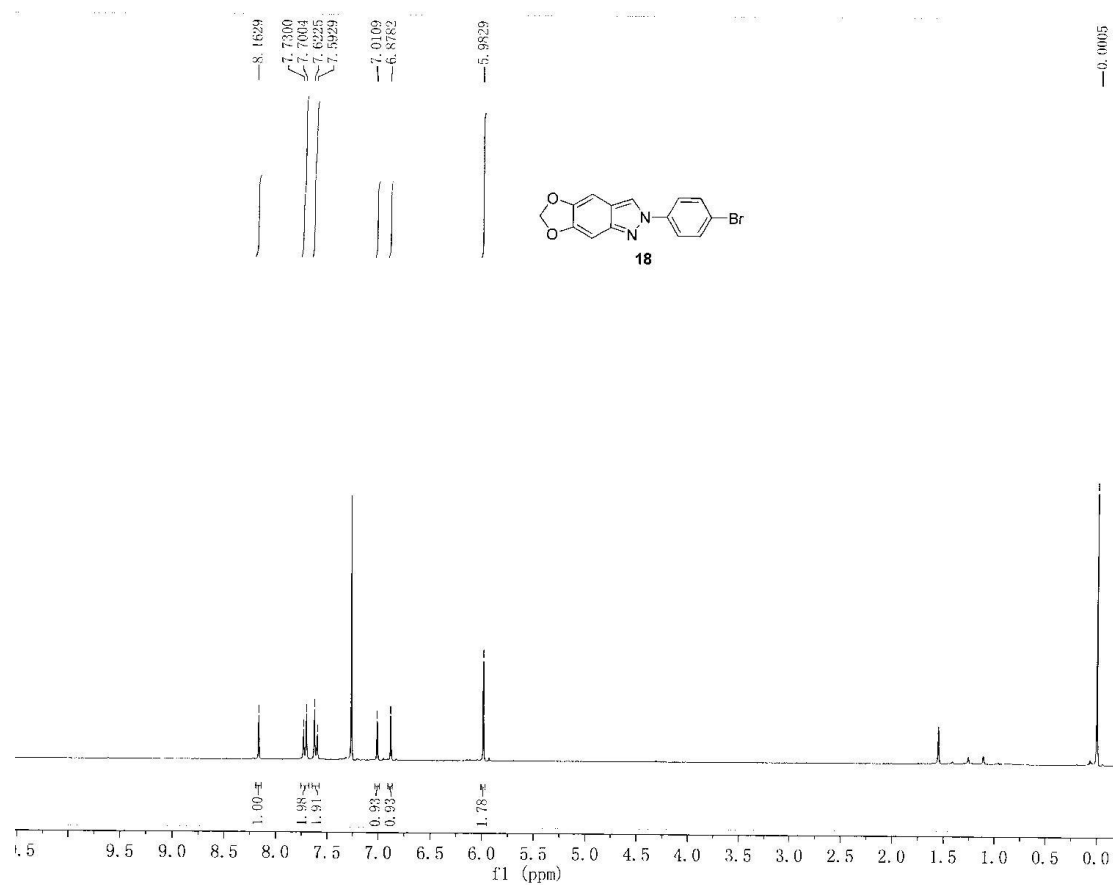

<sup>13</sup>C NMR

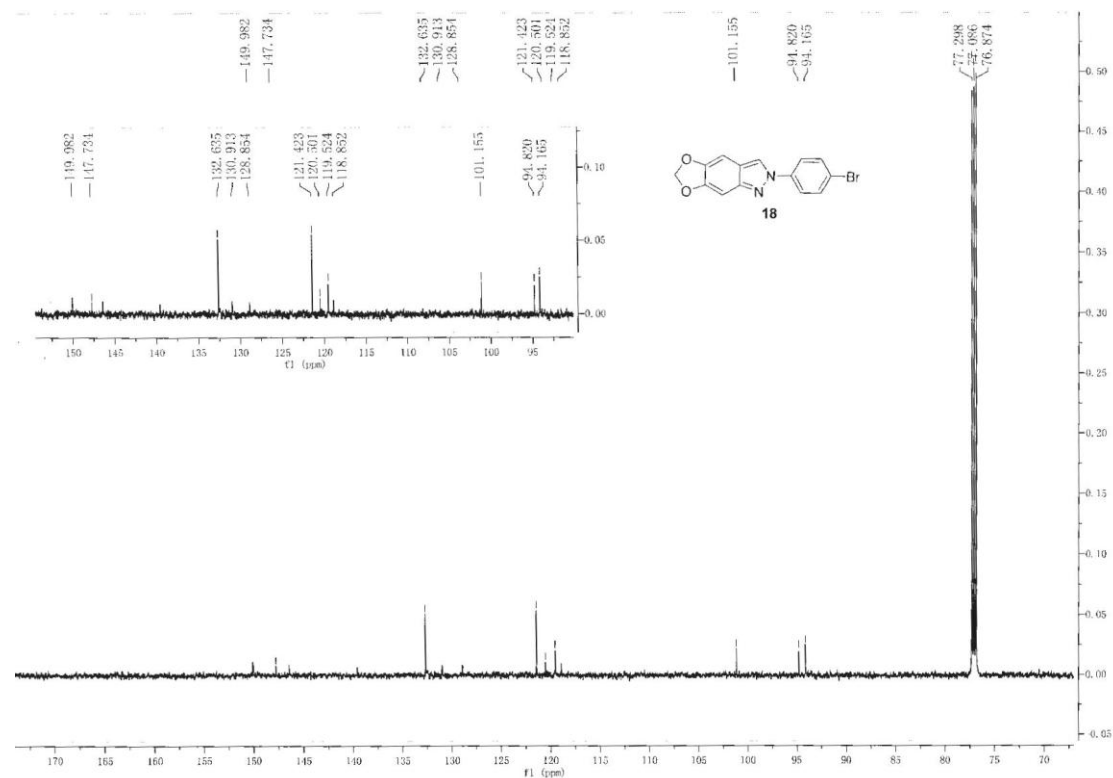

Supporting Information 2

<sup>1</sup>H NMR

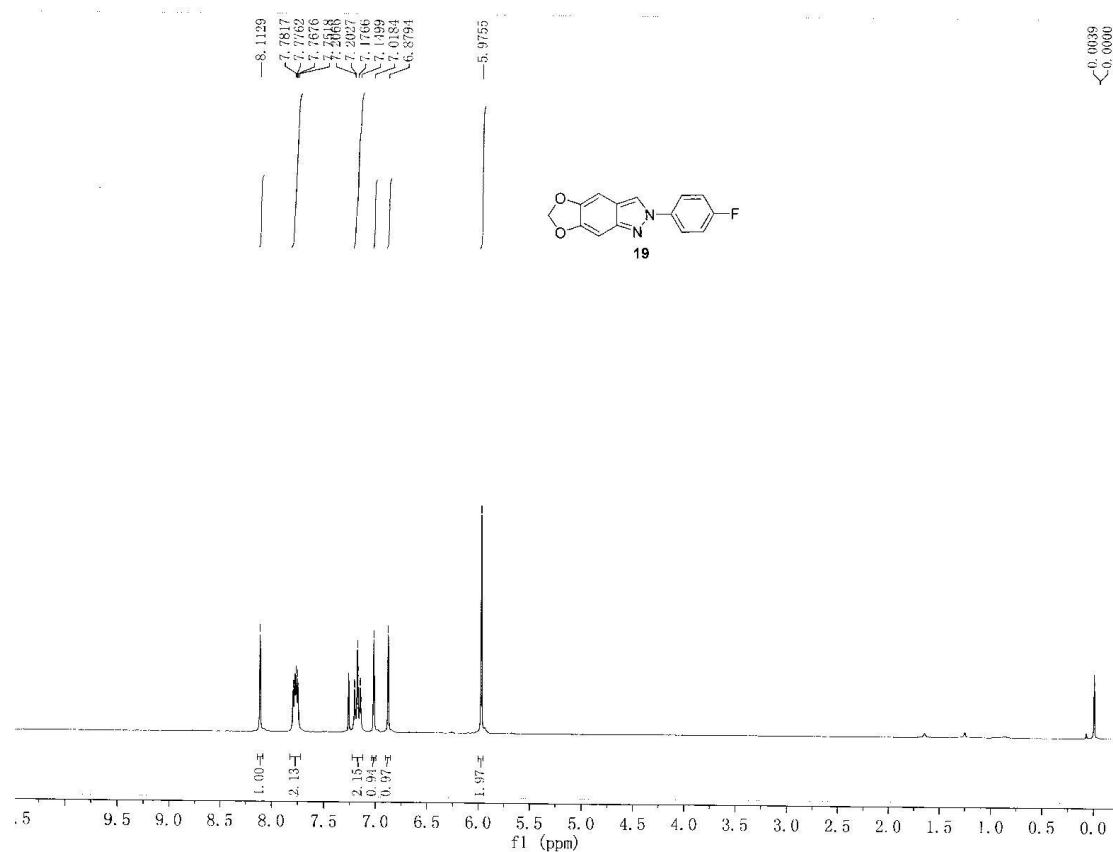

<sup>13</sup>C NMR

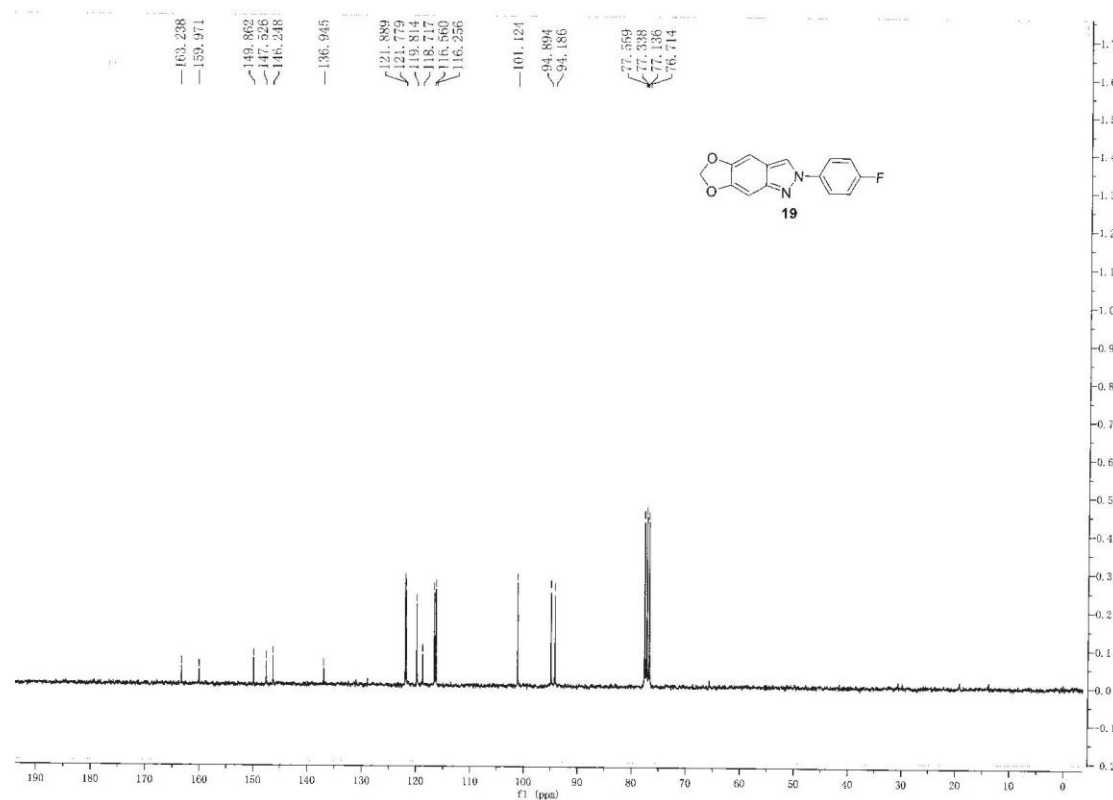

Supporting Information 2

<sup>1</sup>H NMR

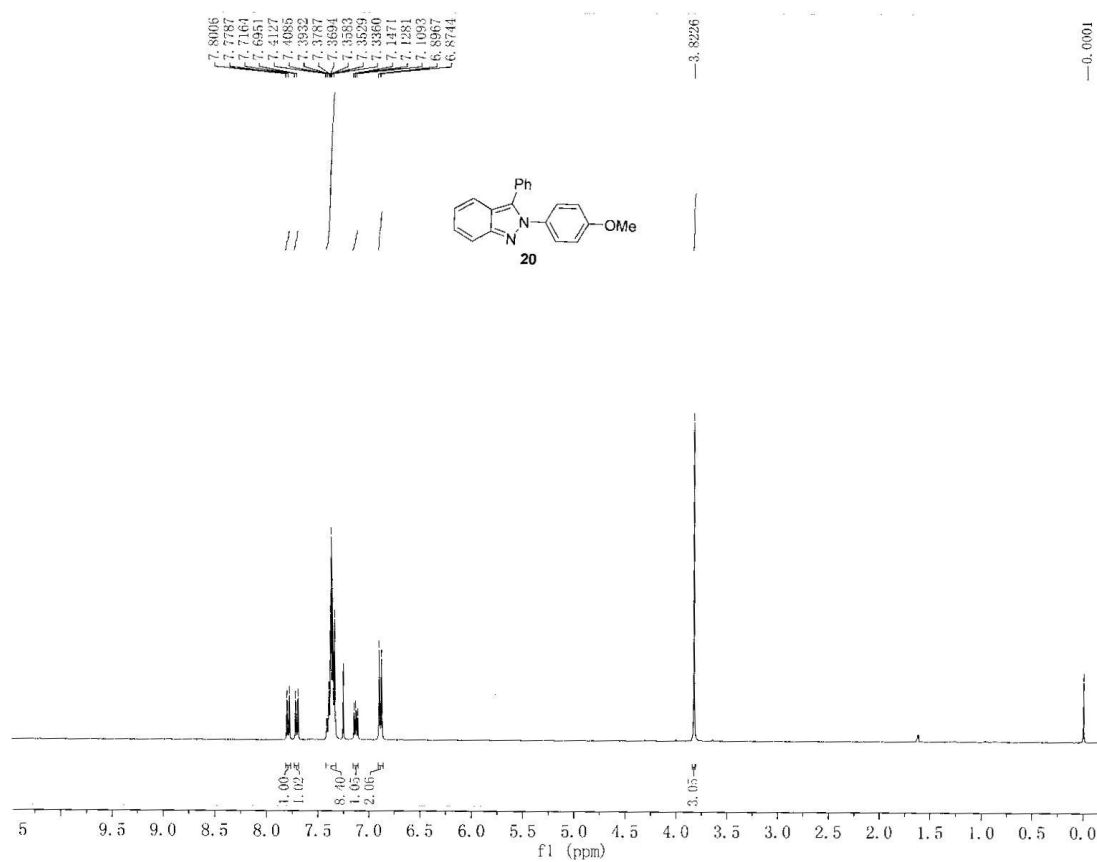

<sup>13</sup>C NMR

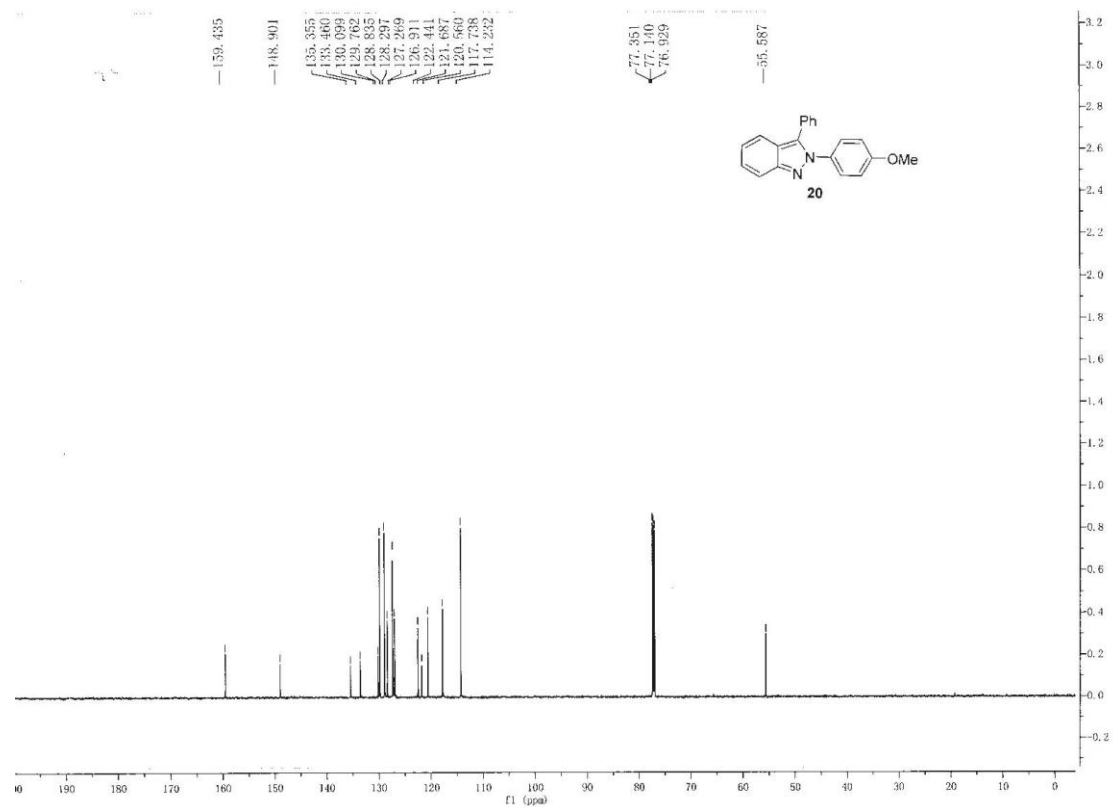

Supporting Information 2

<sup>1</sup>H NMR

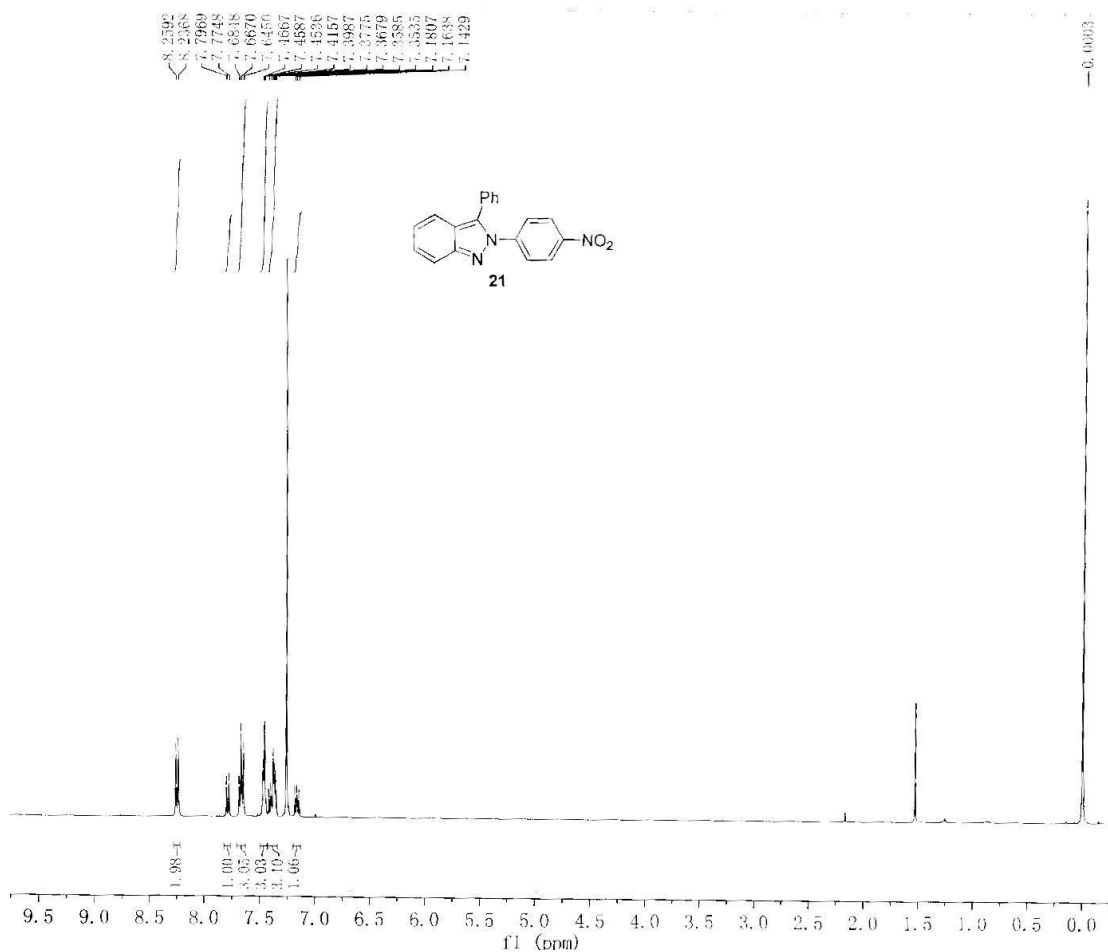

<sup>13</sup>C NMR

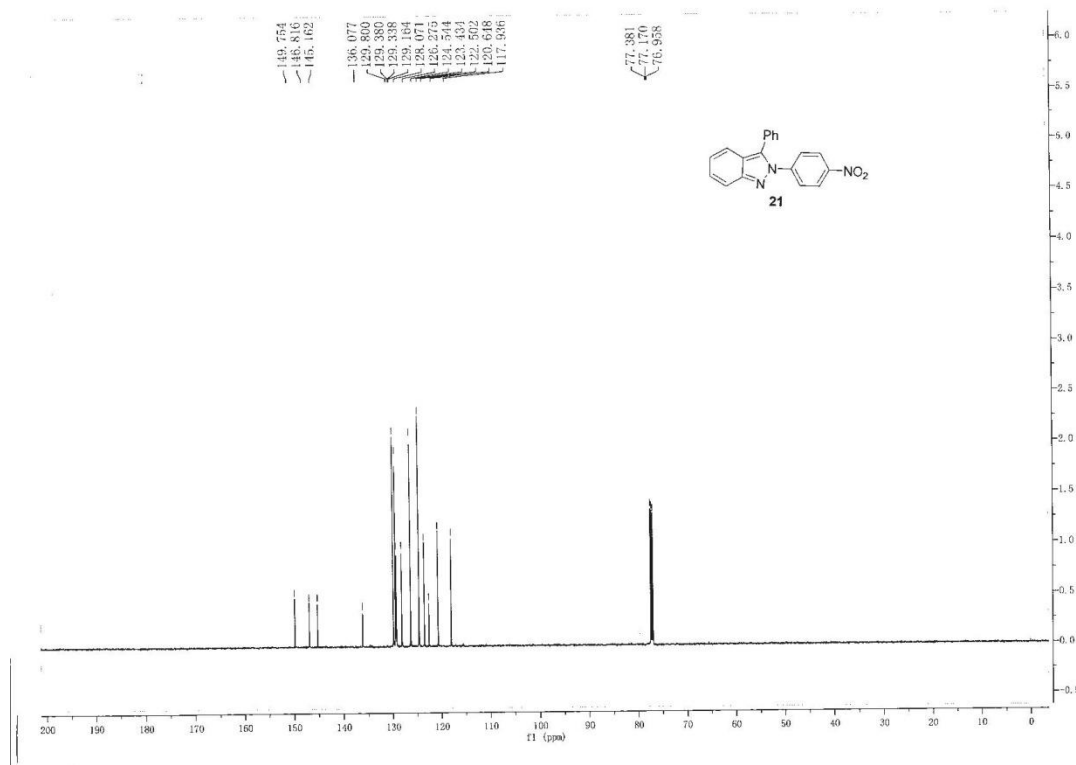

Supporting Information 2

<sup>1</sup>H NMR

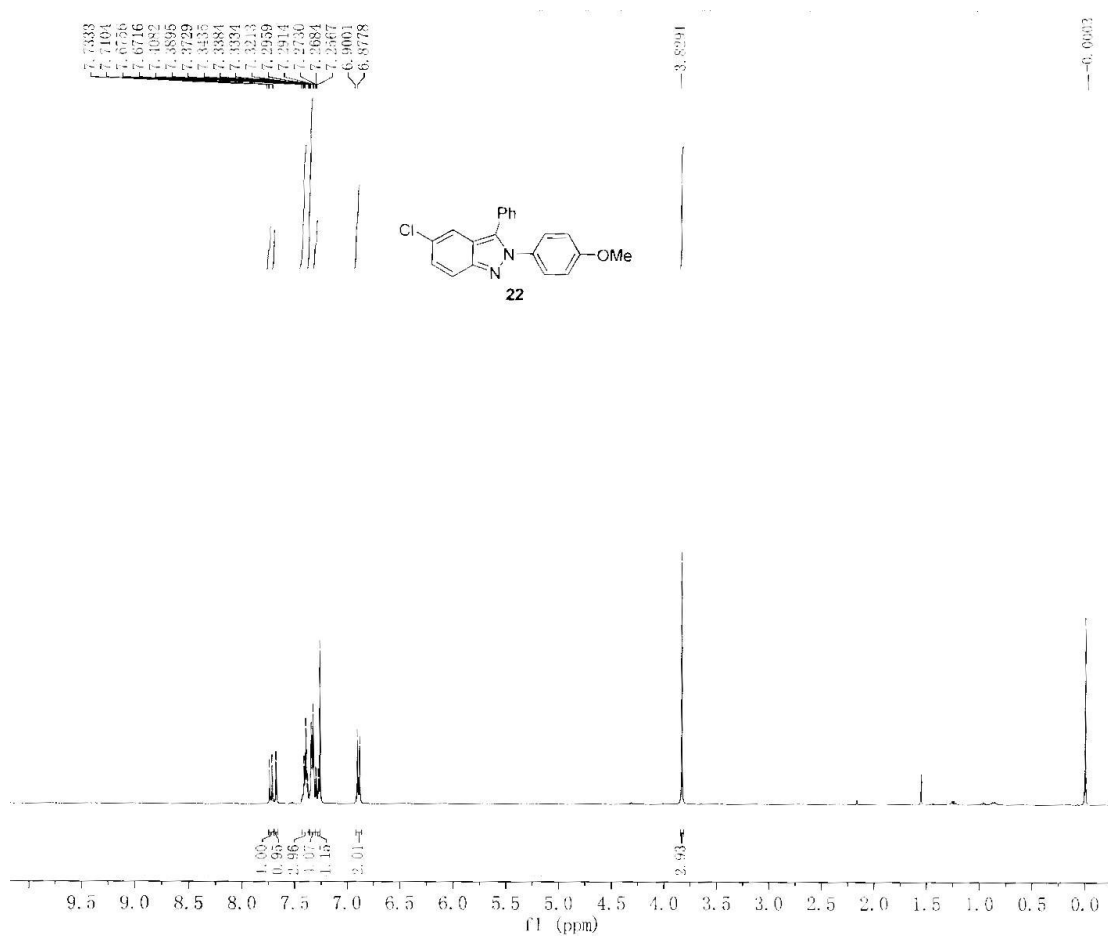

<sup>13</sup>C NMR

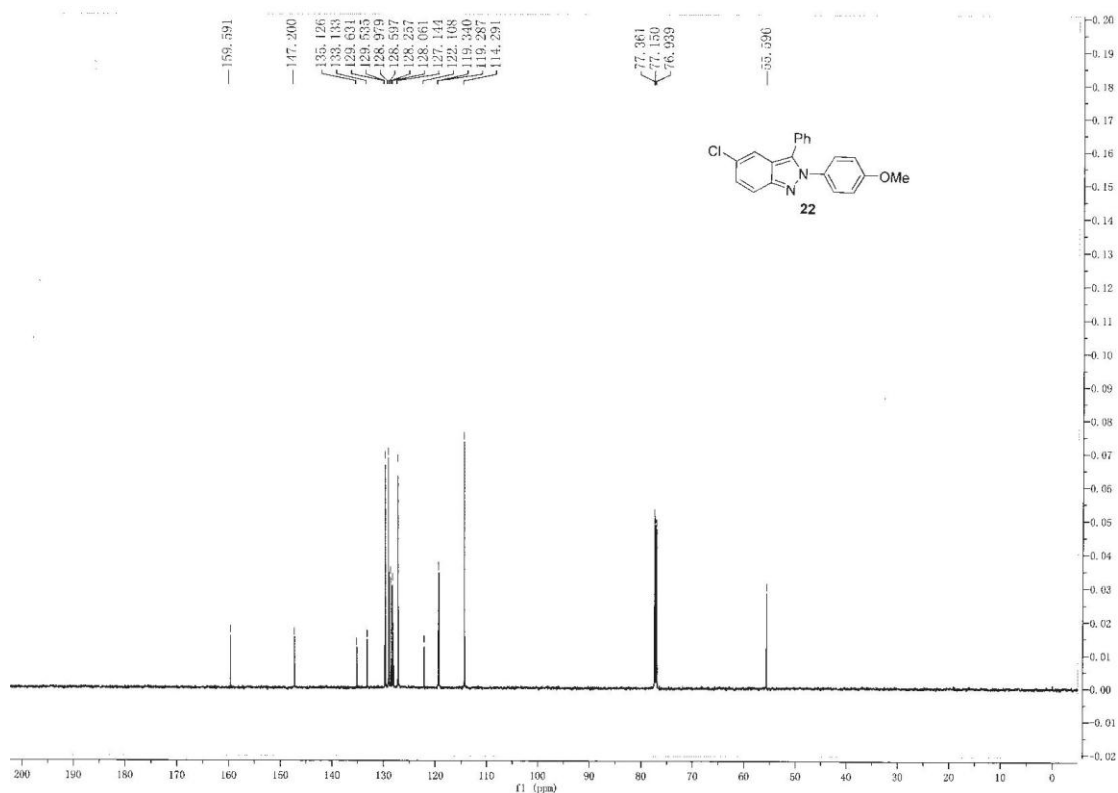

Supporting Information 2

<sup>1</sup>H NMR

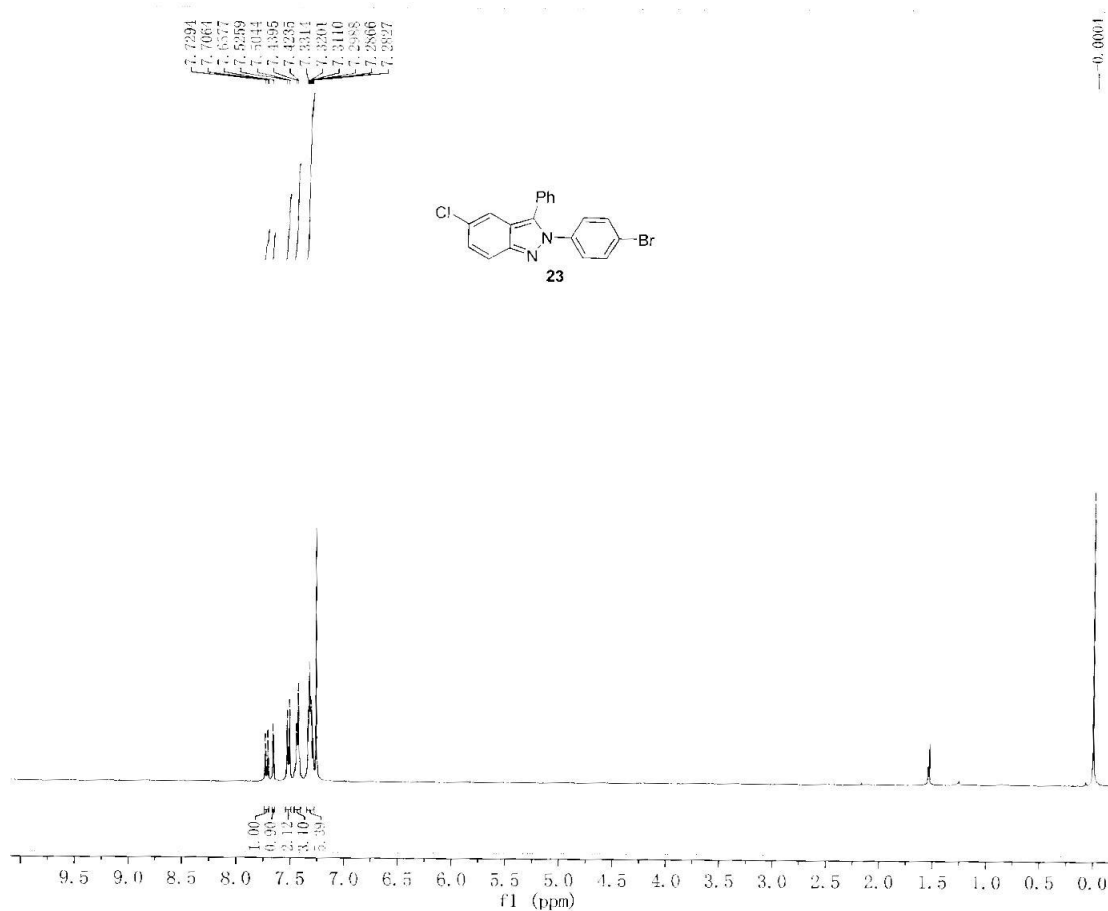

<sup>13</sup>C NMR

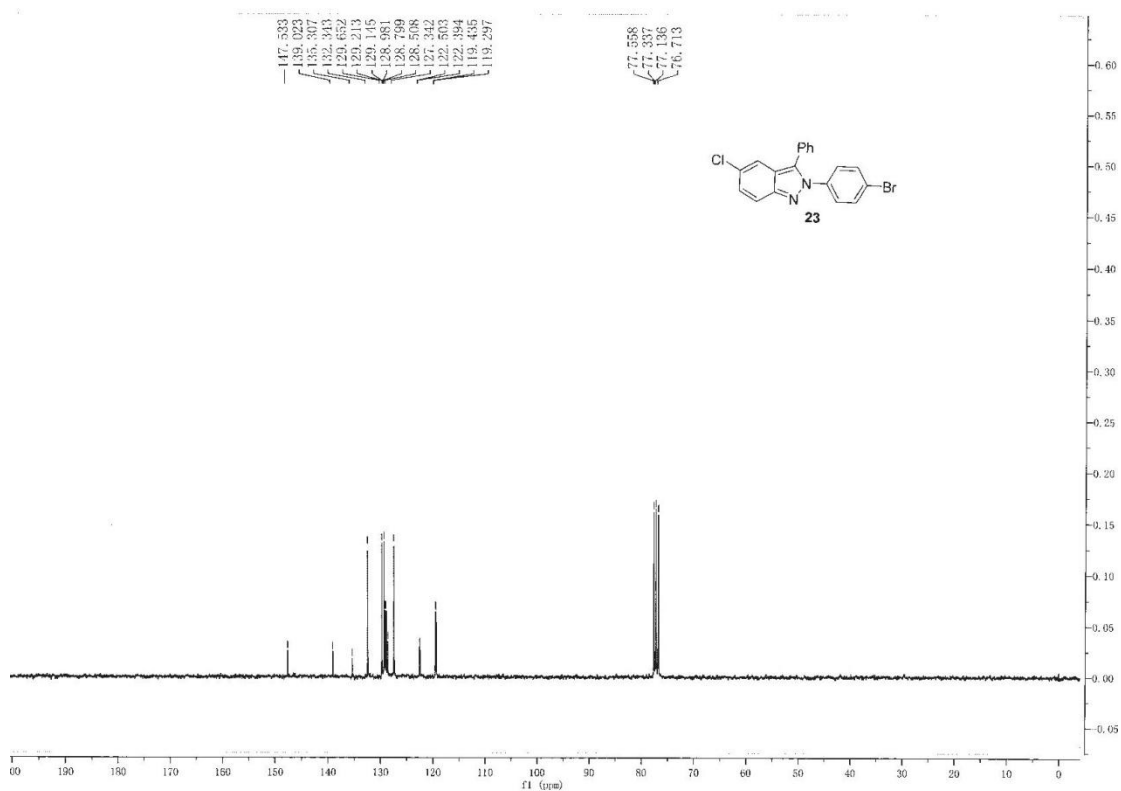

Supporting Information 2

<sup>1</sup>H NMR

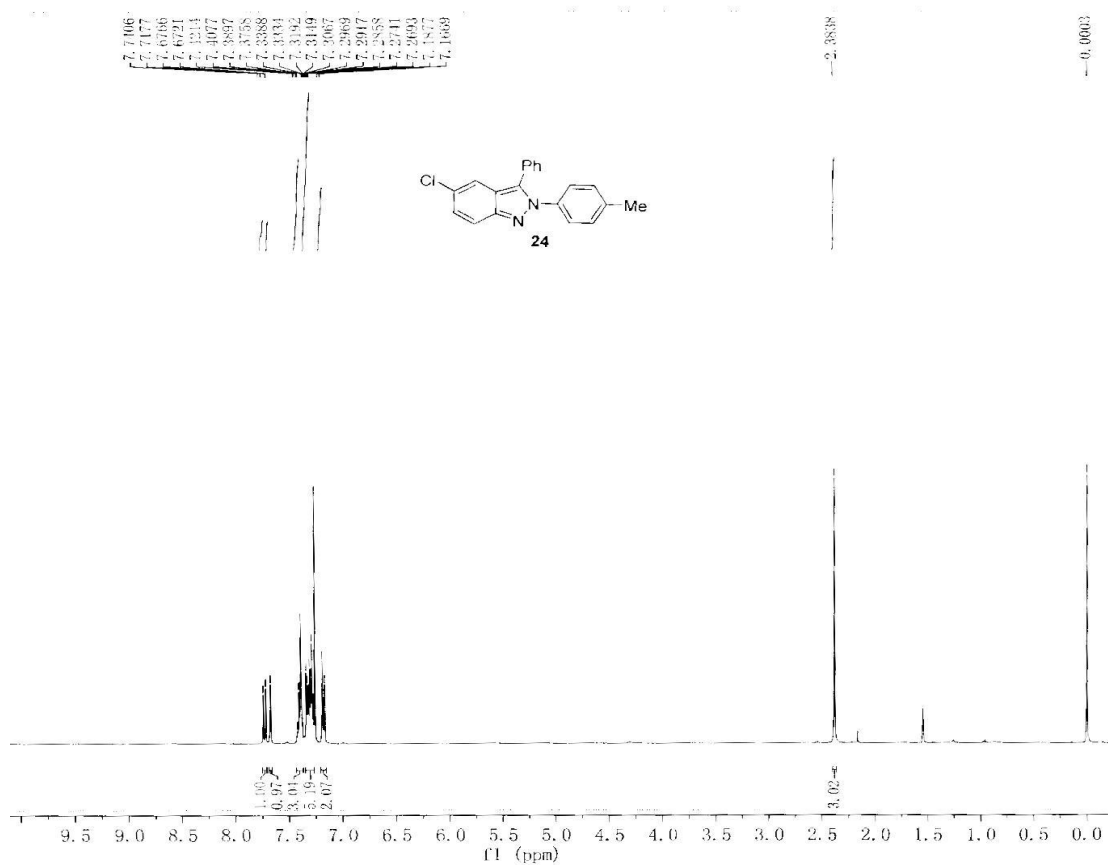

<sup>13</sup>C NMR

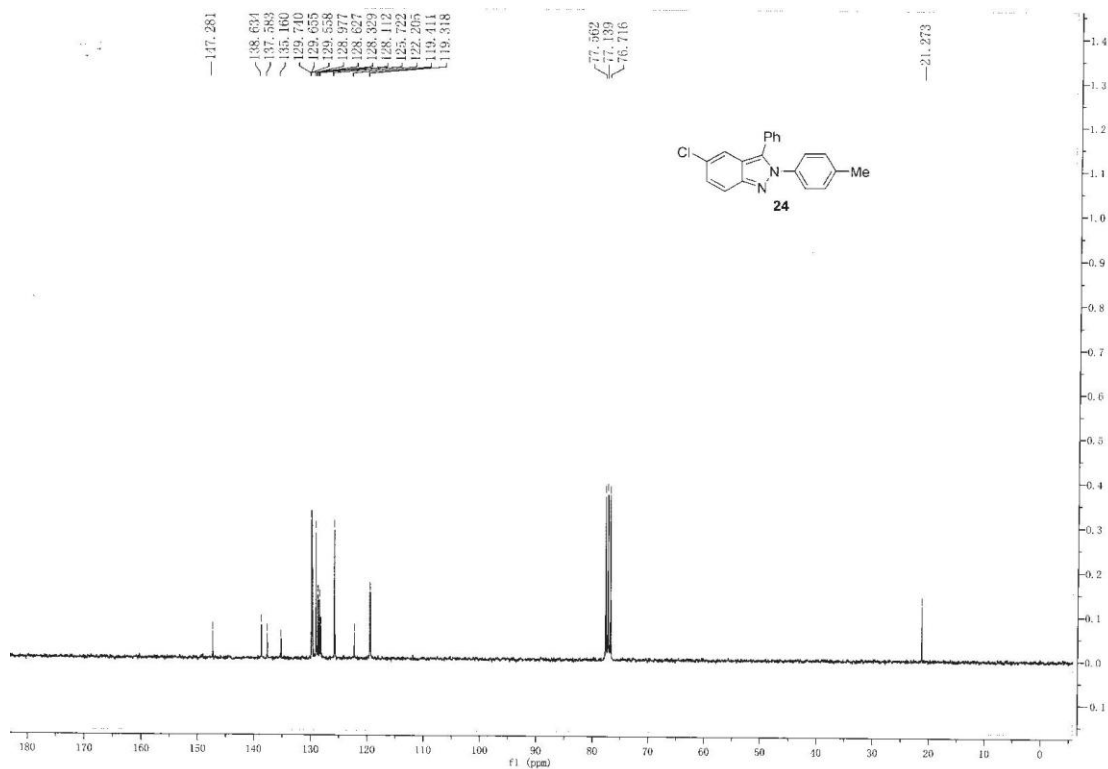

Supporting Information 2

<sup>1</sup>H NMR

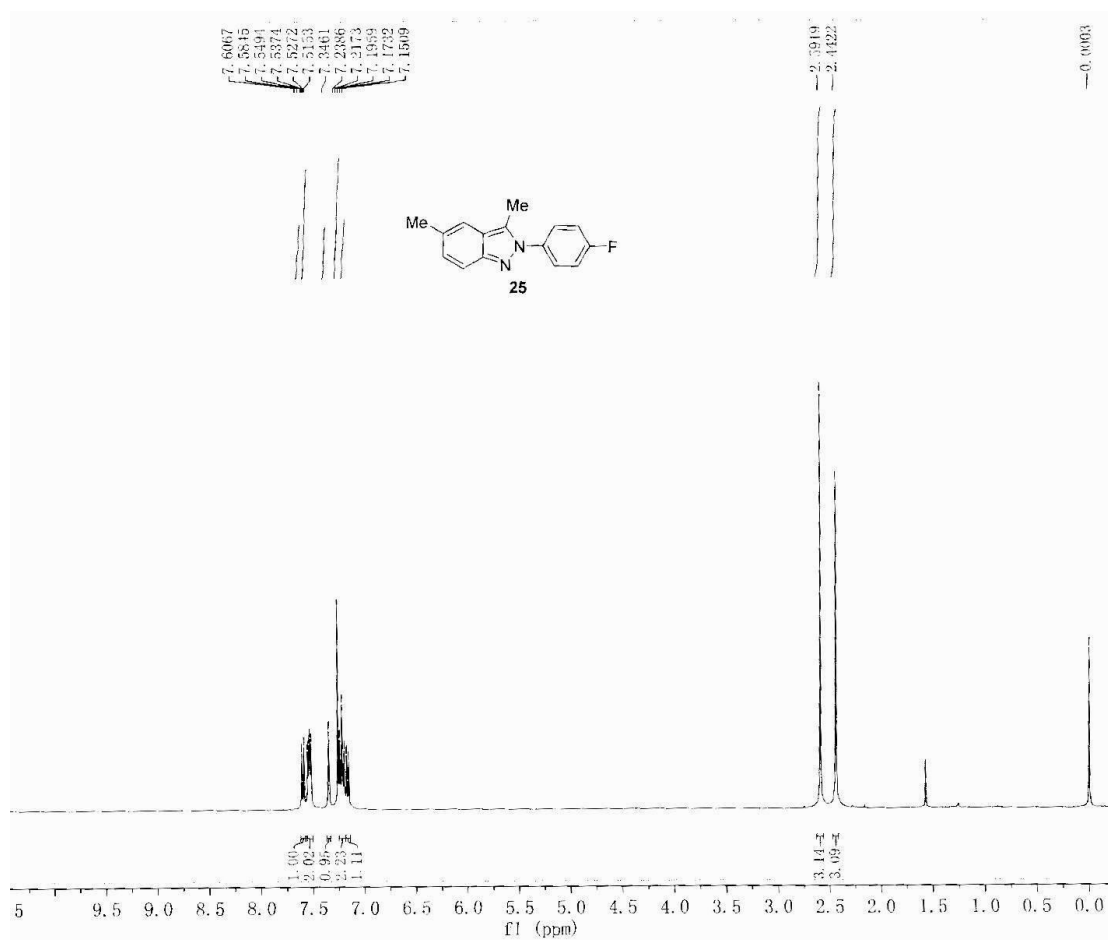

<sup>13</sup>C NMR

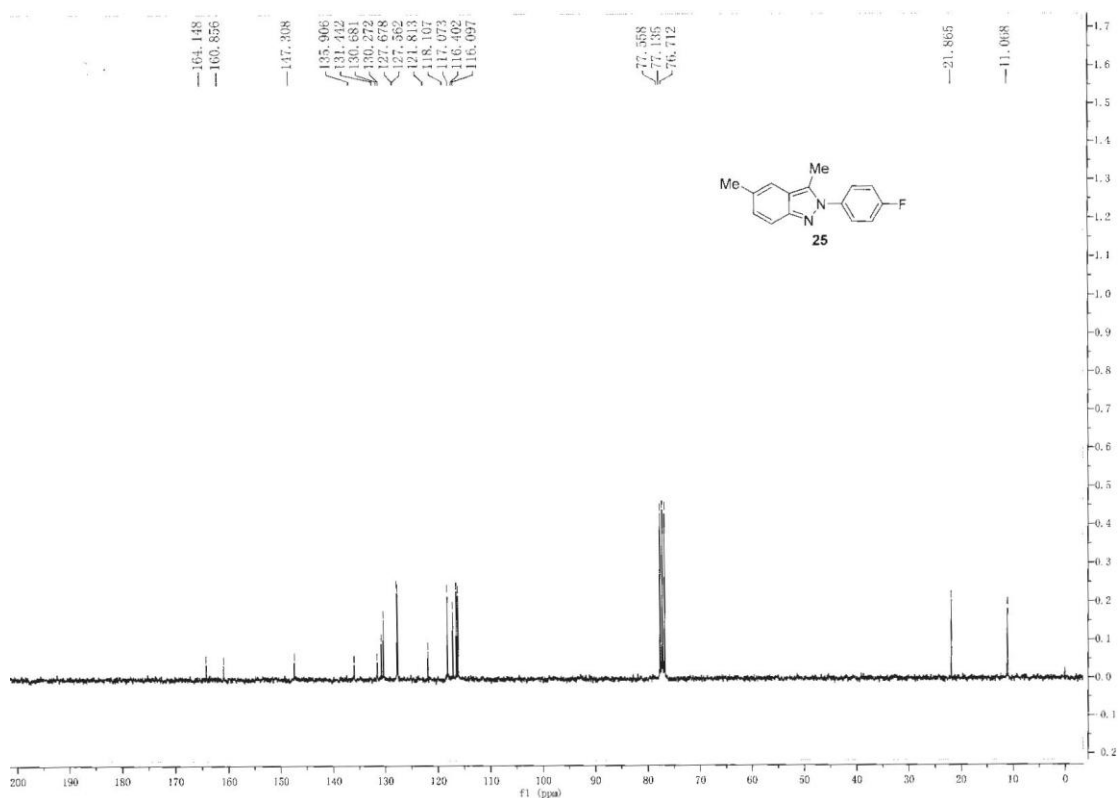



Supporting Information 2

<sup>1</sup>H NMR

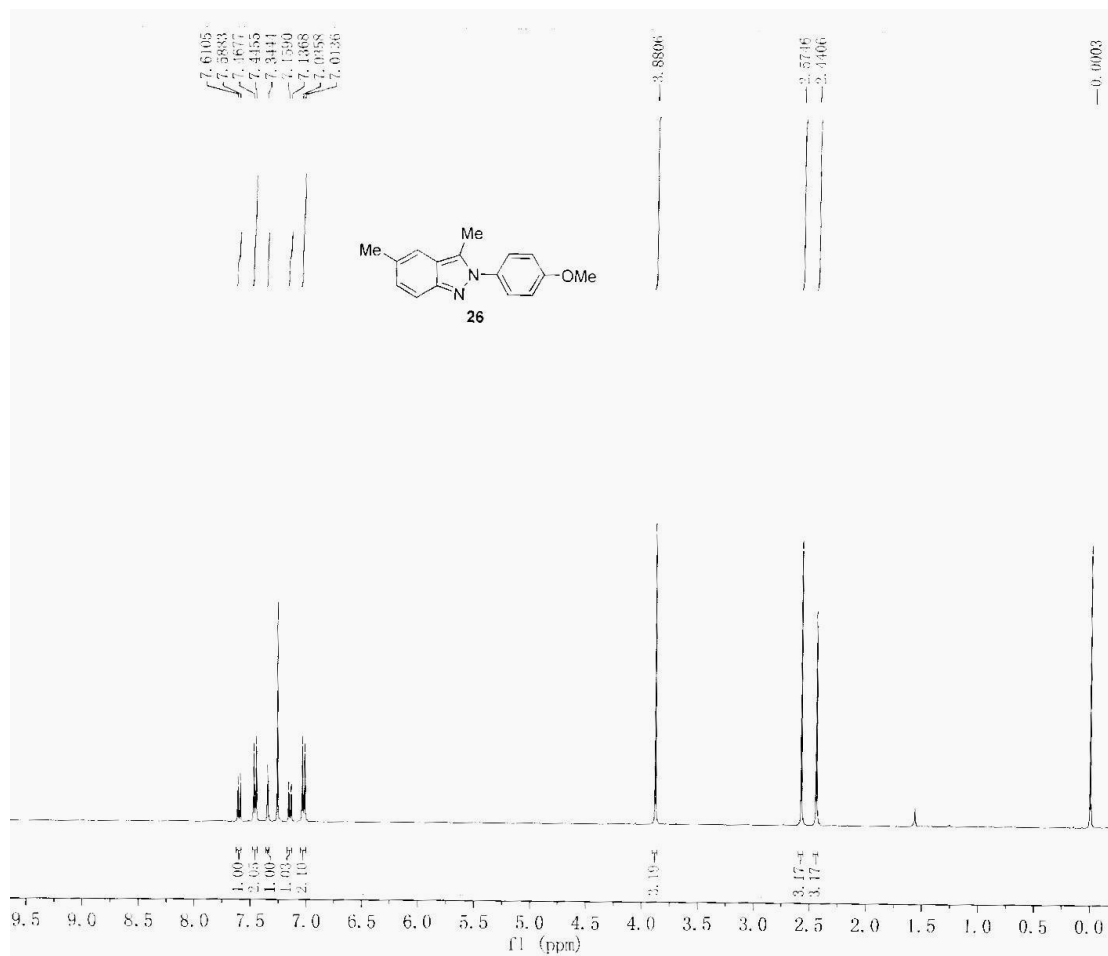

<sup>13</sup>C NMR

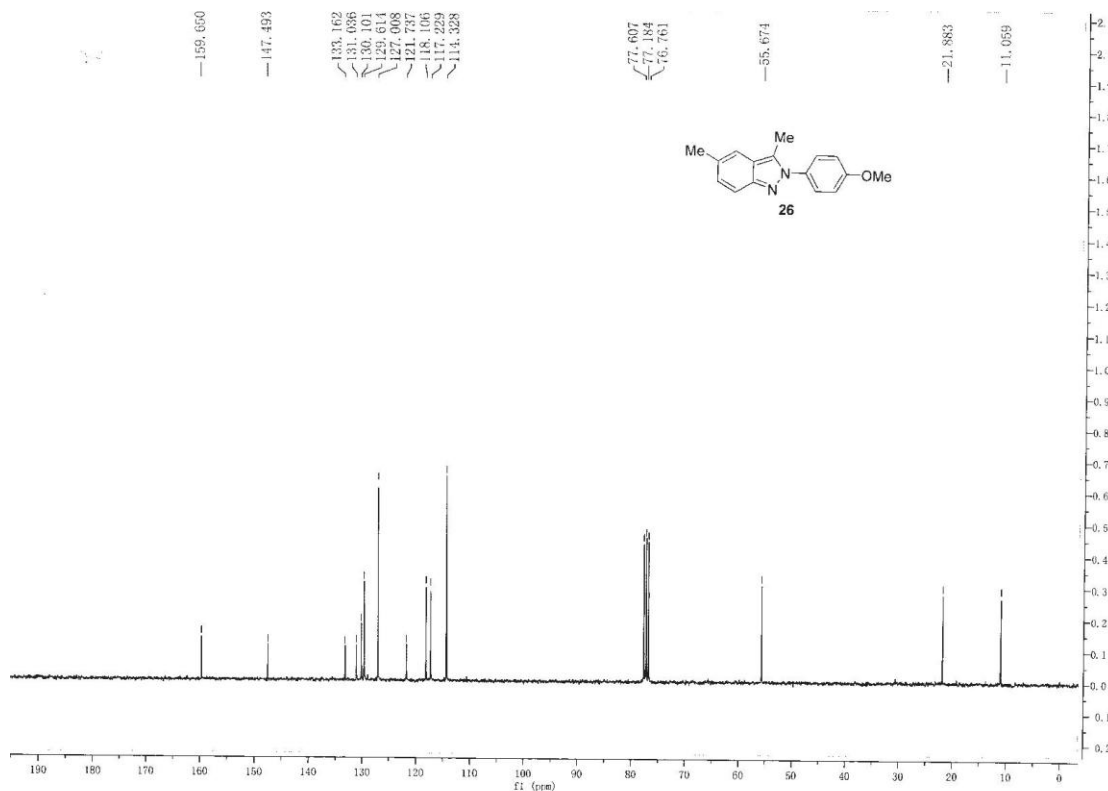

Supporting Information 2

<sup>1</sup>H NMR

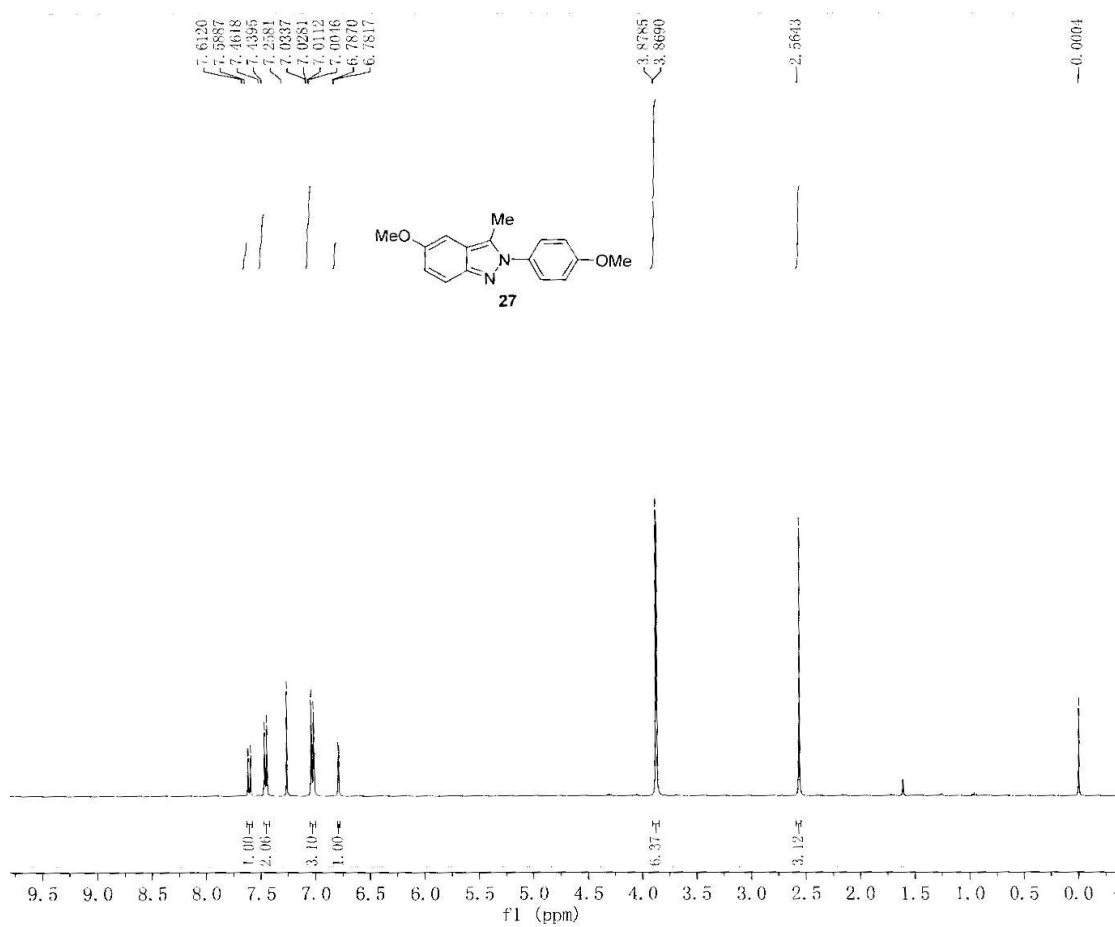

<sup>13</sup>C NMR

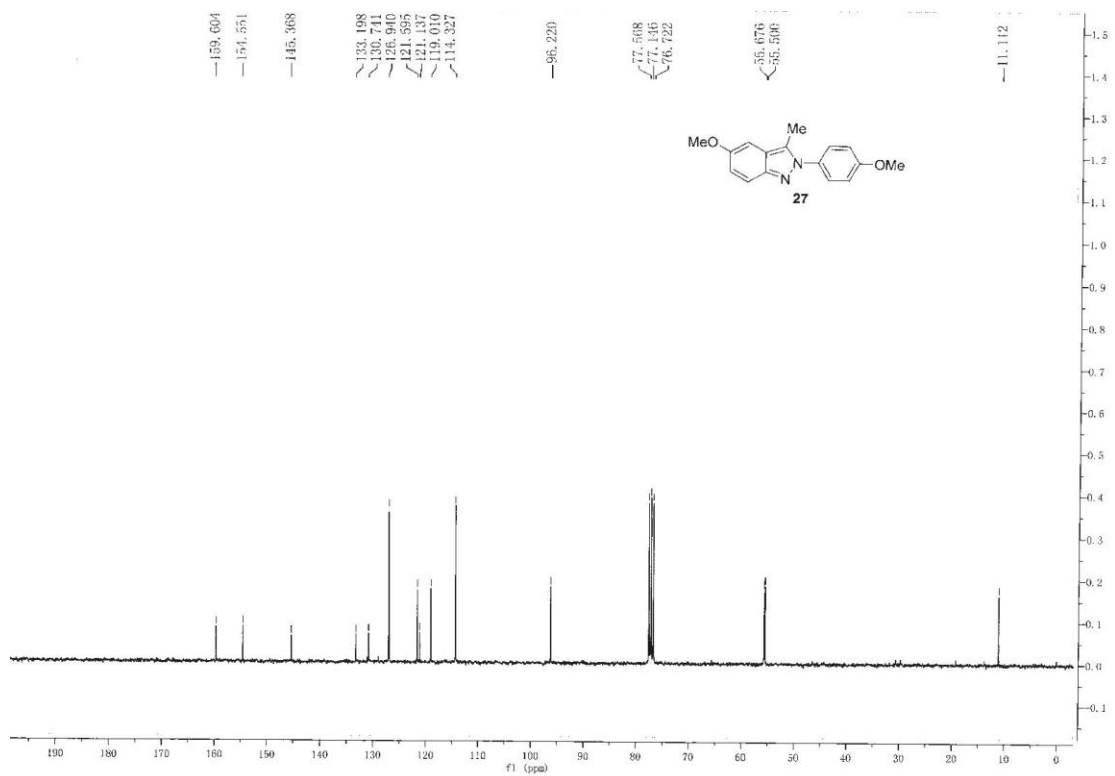

Supporting Information 2

<sup>1</sup>H NMR

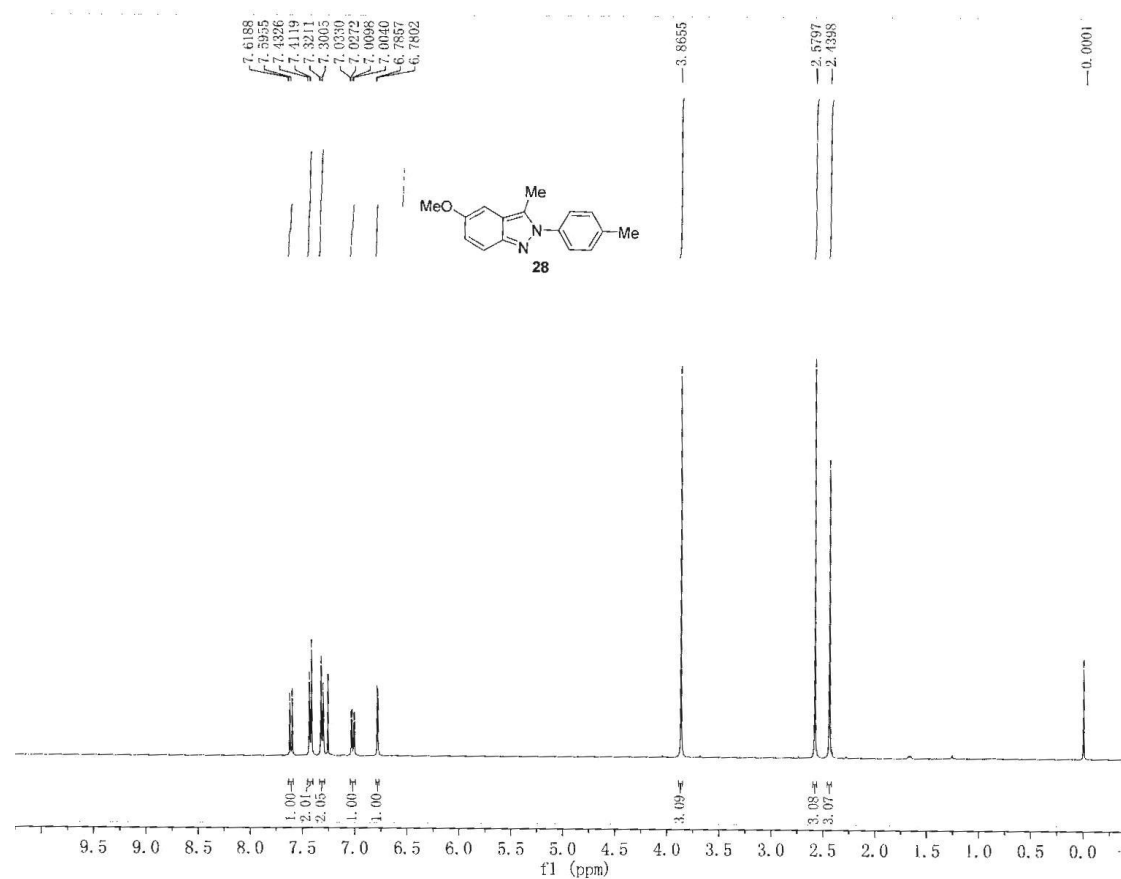

<sup>13</sup>C NMR

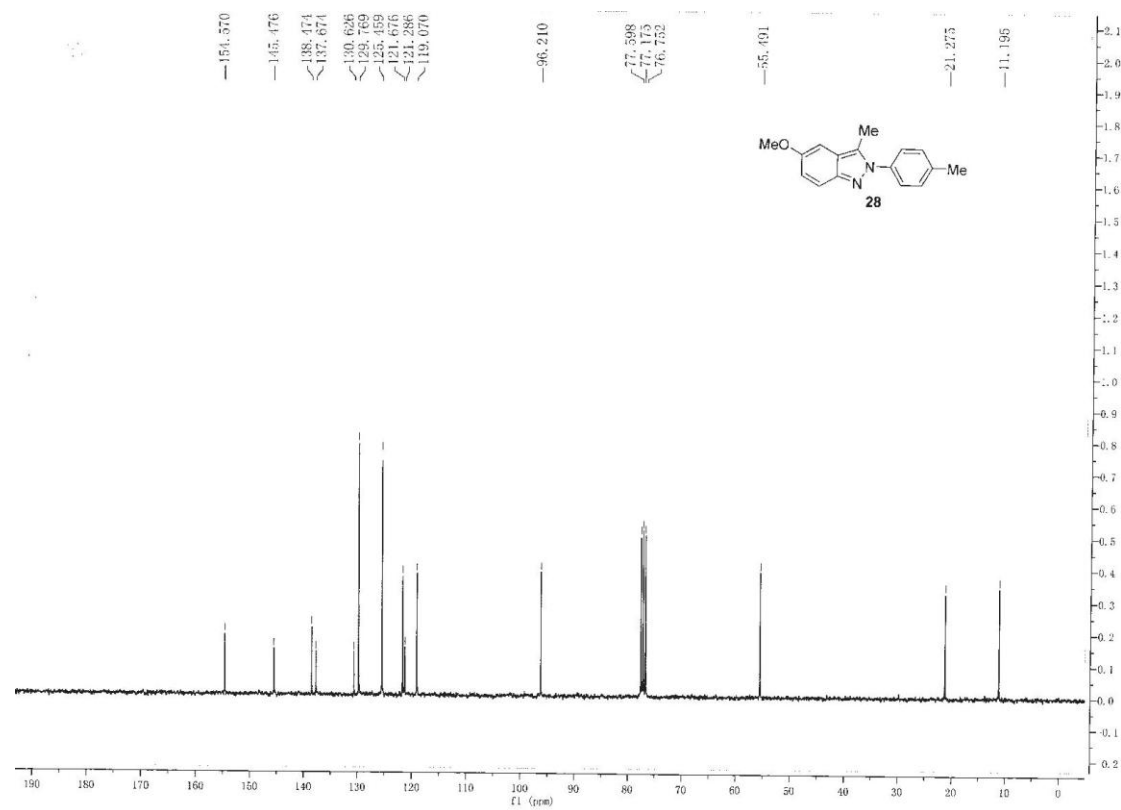

Supporting Information 2

<sup>1</sup>H NMR

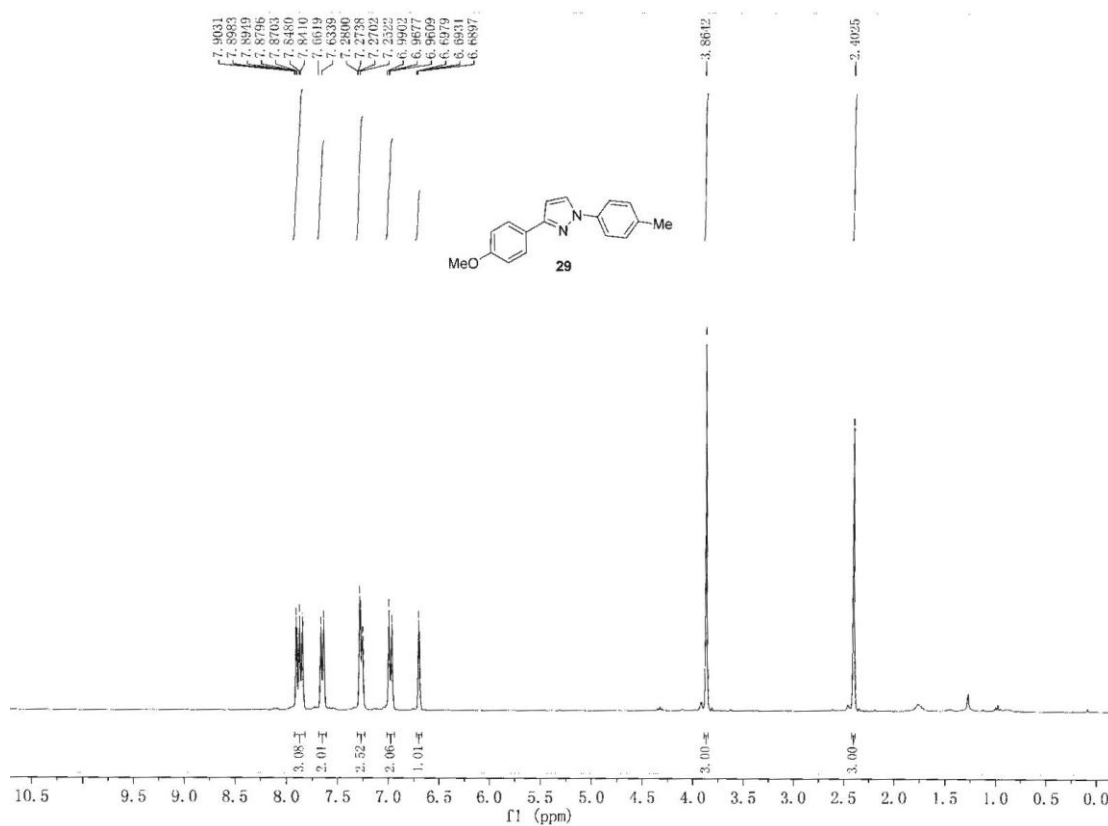

<sup>13</sup>C NMR

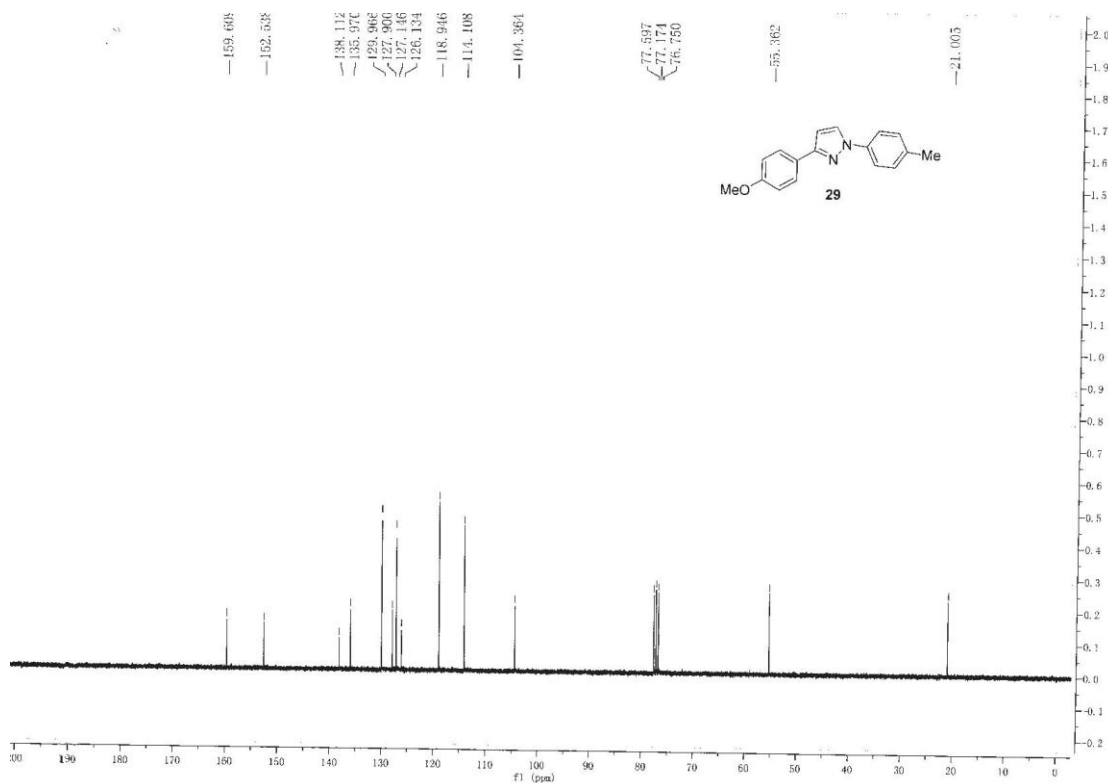

Supporting Information 2

<sup>1</sup>H NMR

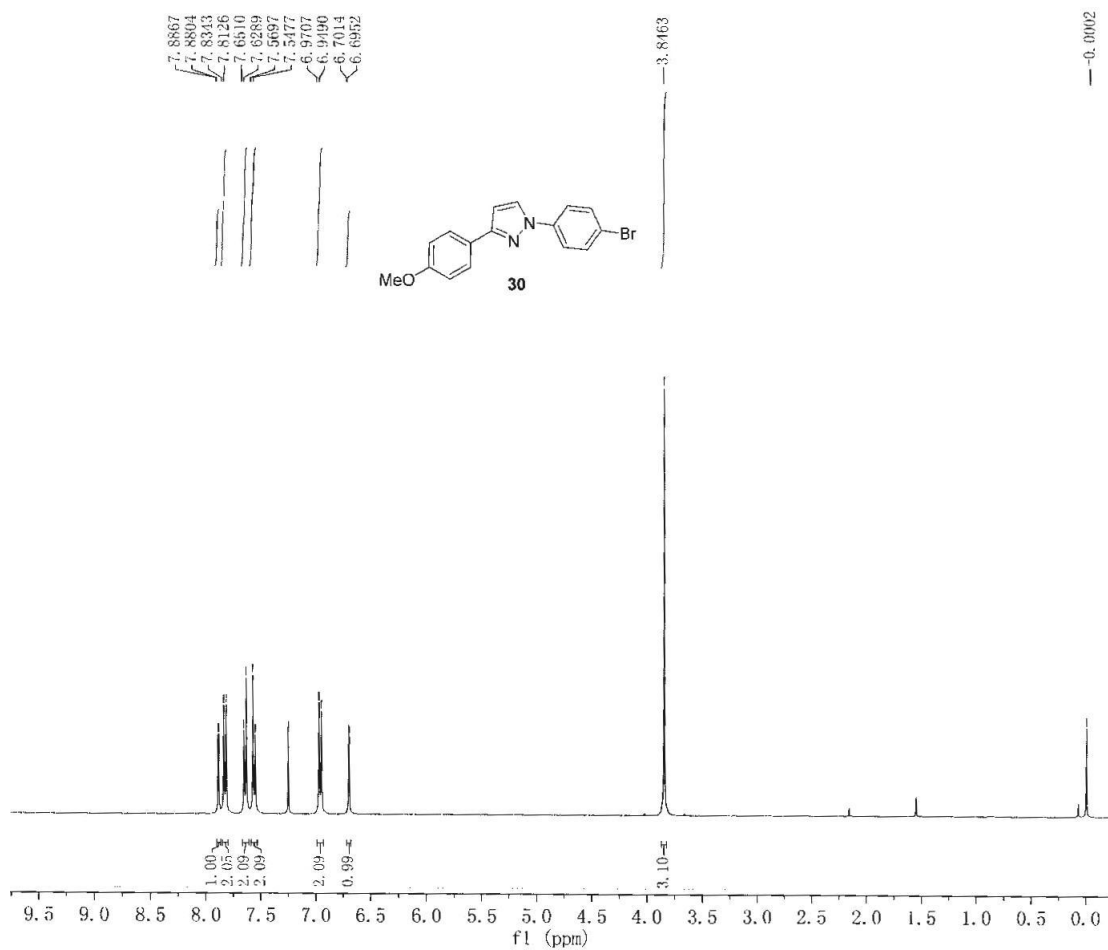

<sup>13</sup>C NMR

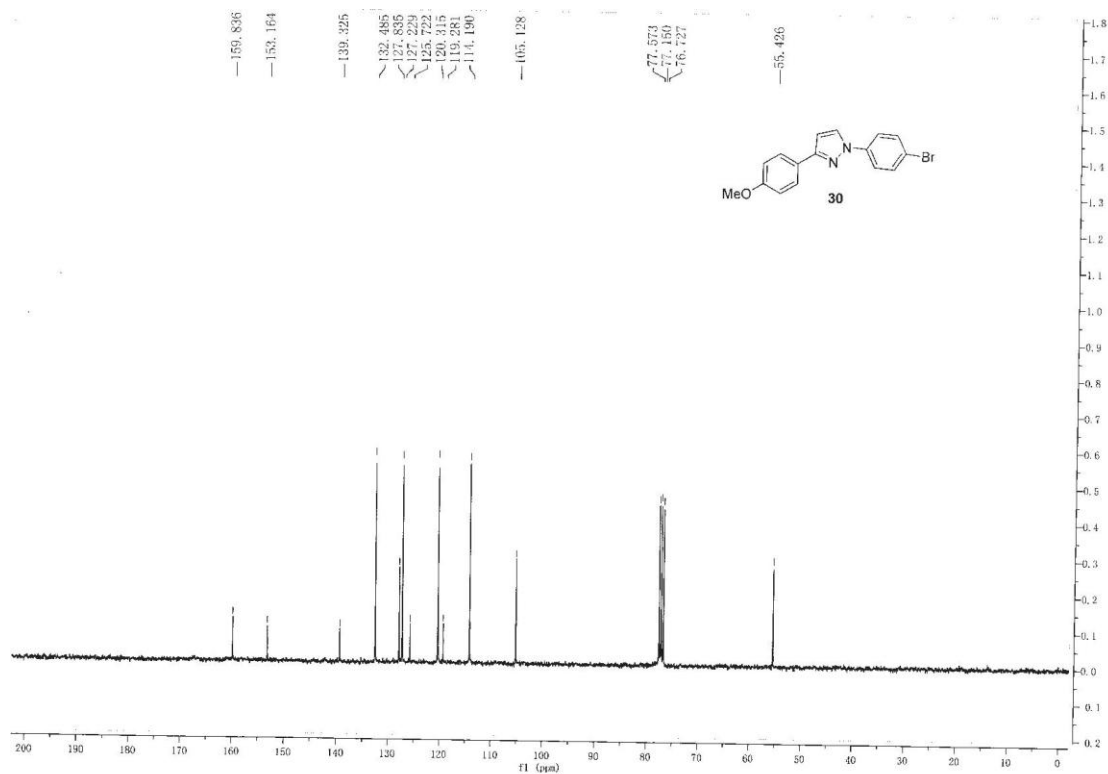

Supporting Information 2

<sup>1</sup>H NMR

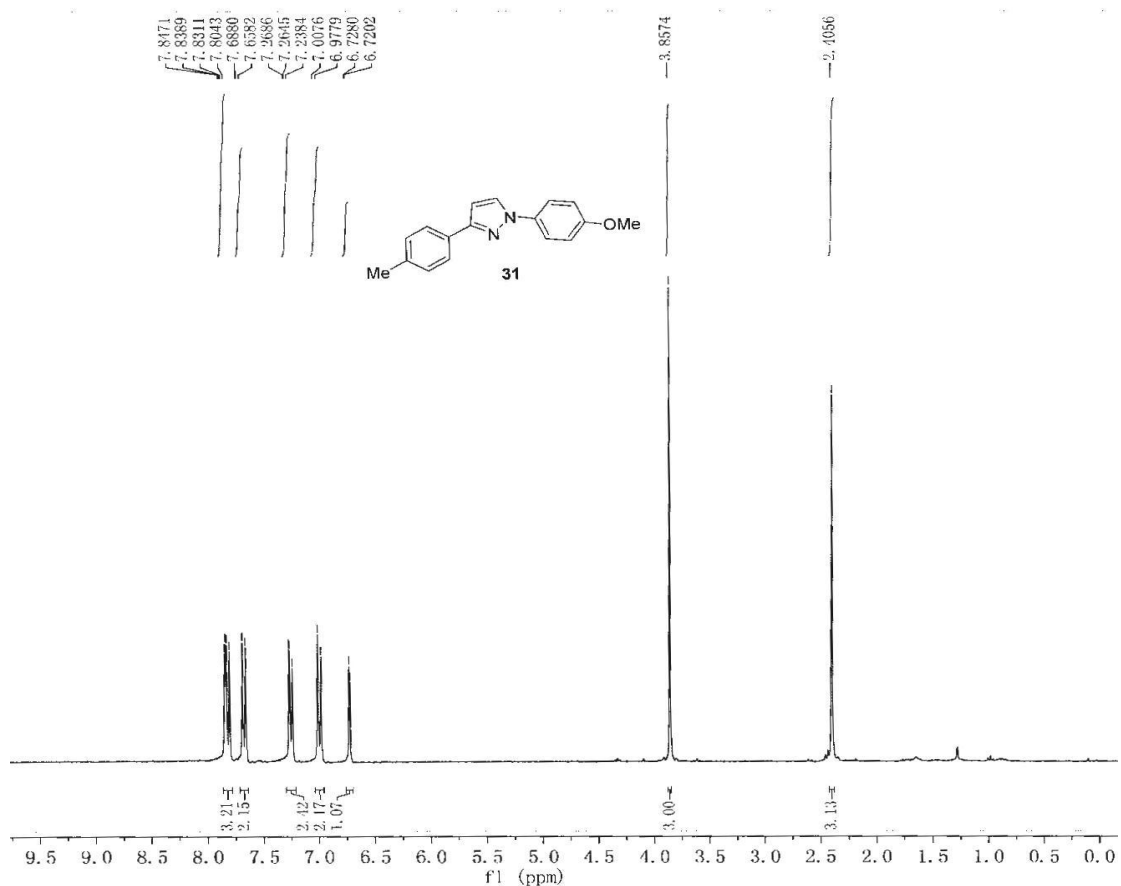

<sup>13</sup>C NMR

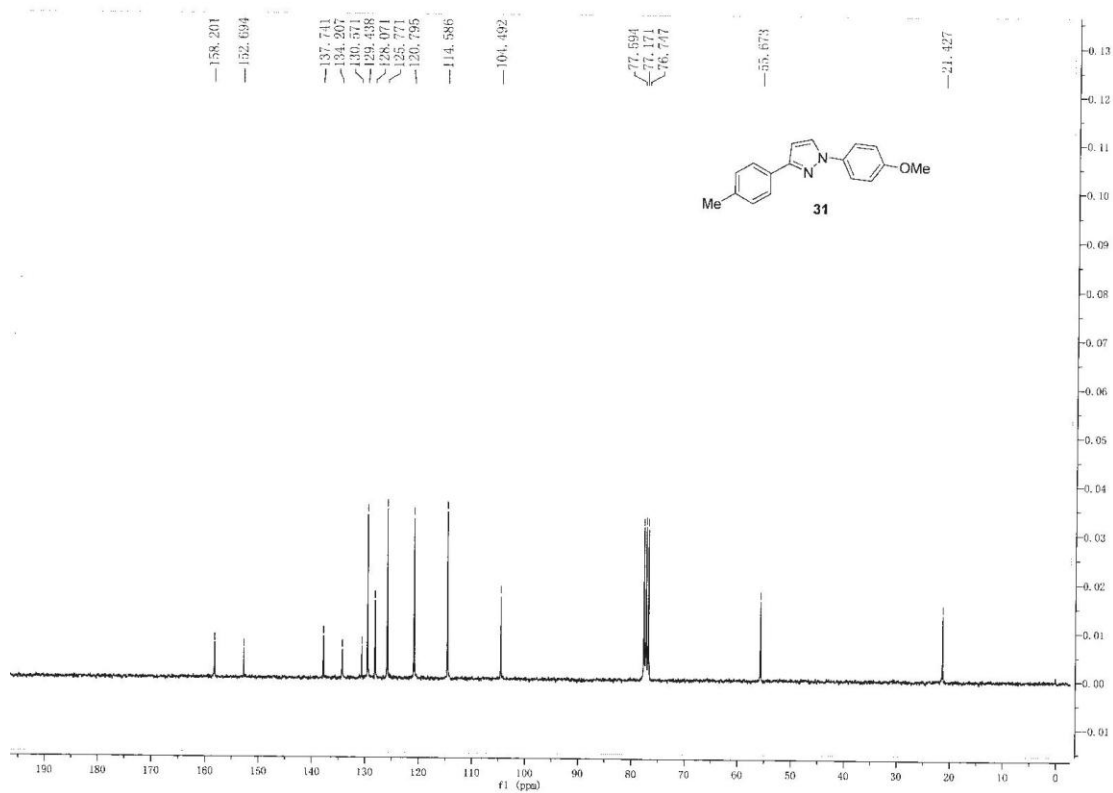

Supporting Information 2

<sup>1</sup>H NMR

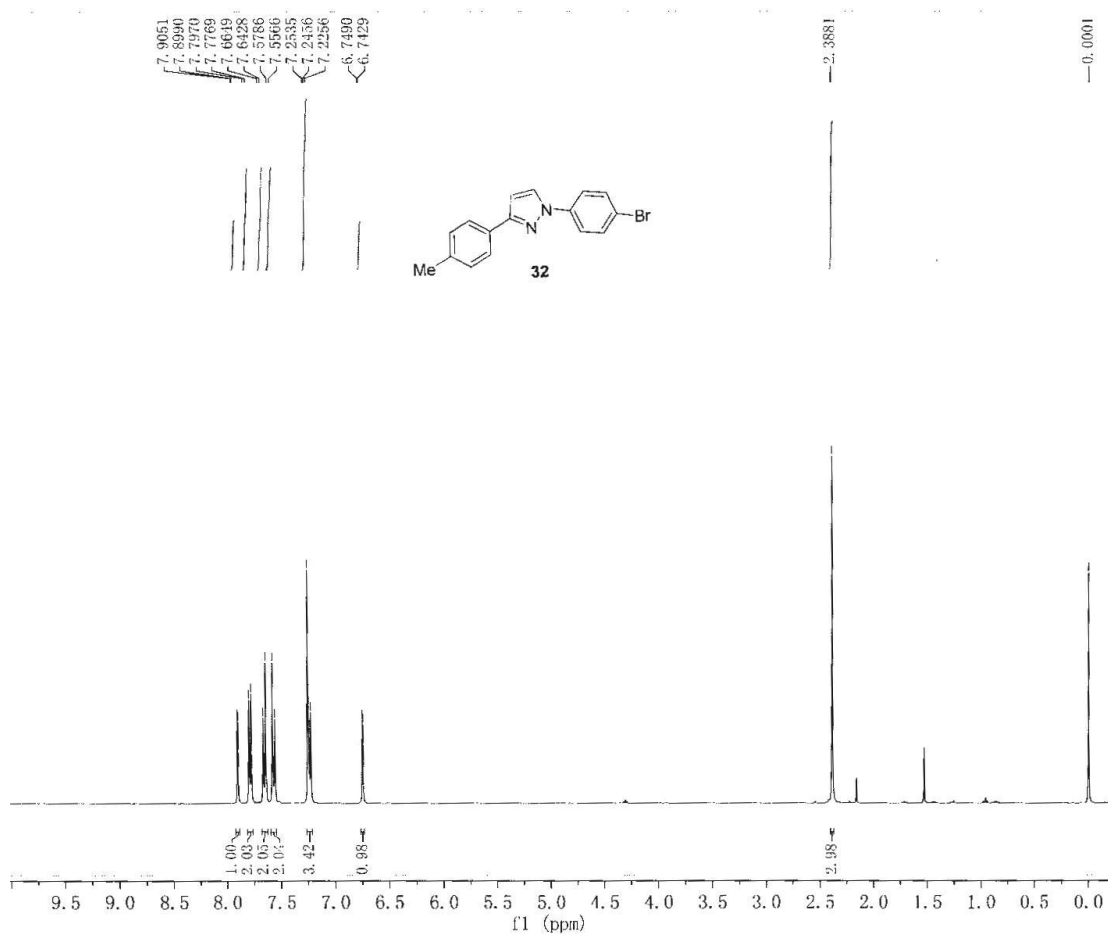

<sup>13</sup>C NMR

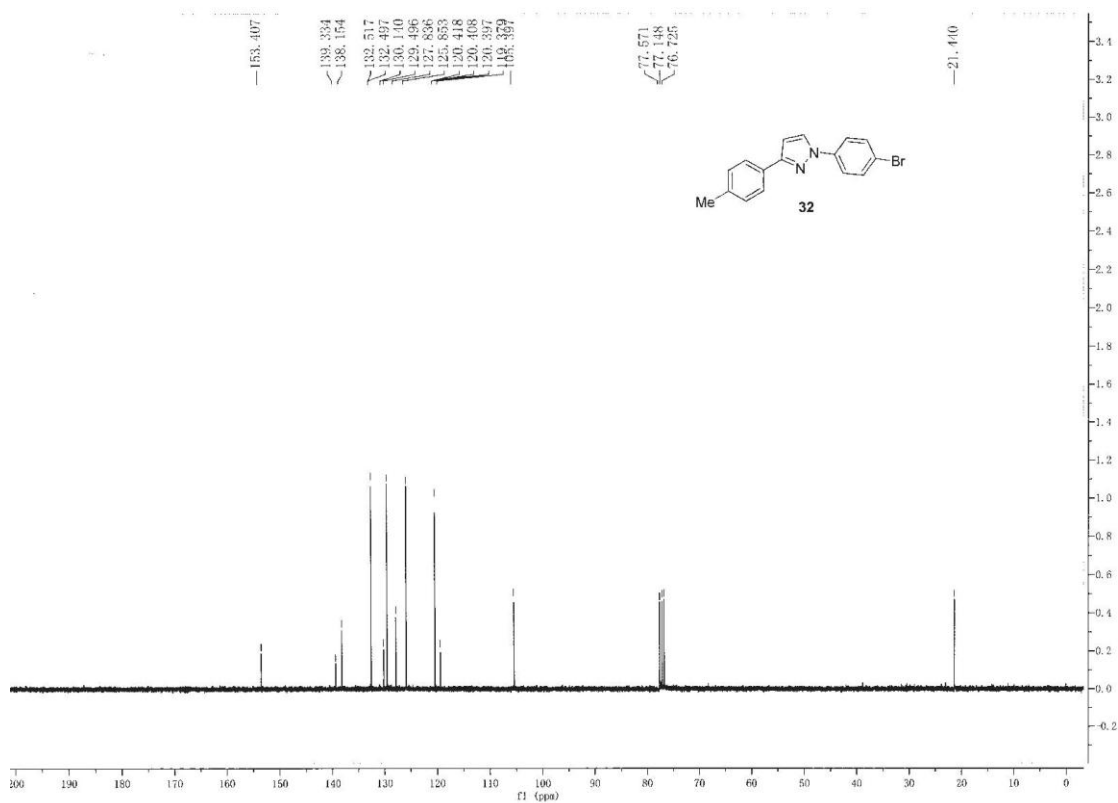

Supporting Information 2

<sup>1</sup>H NMR

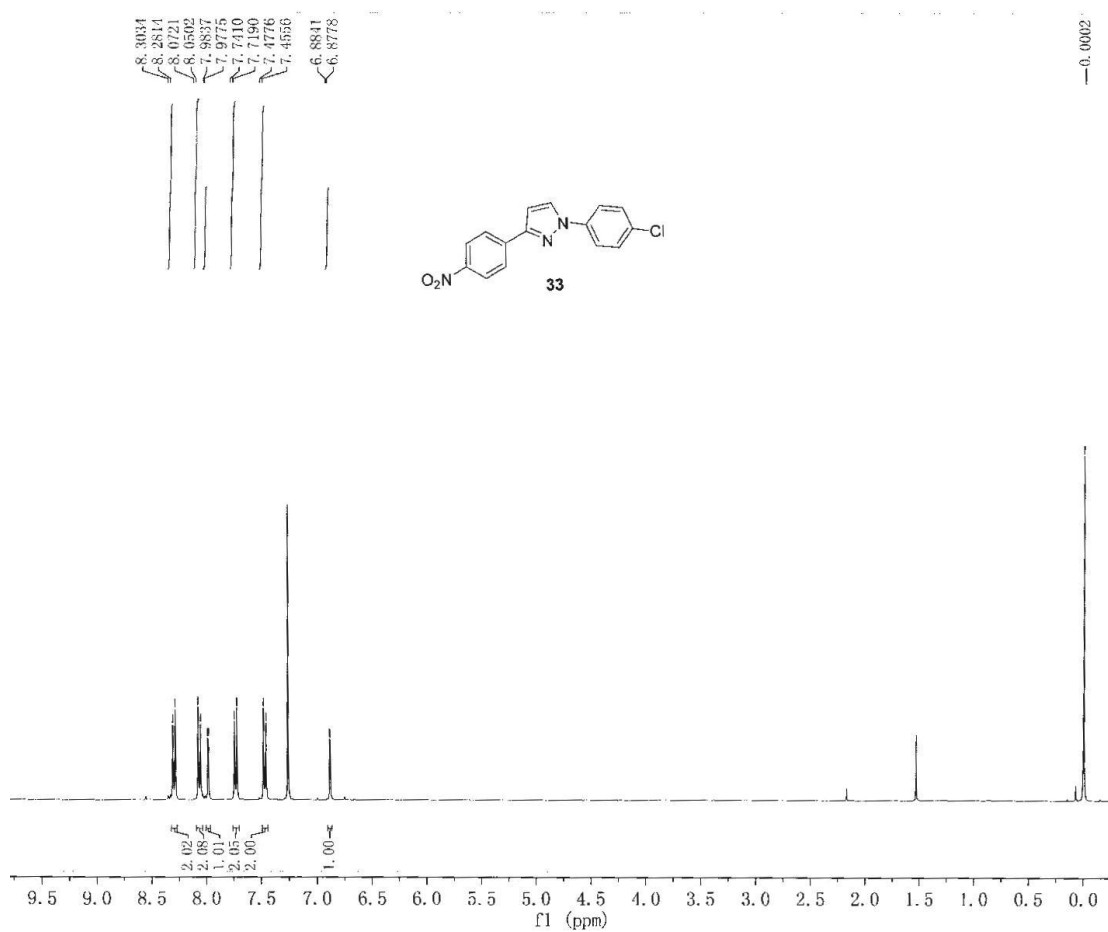

<sup>13</sup>C NMR

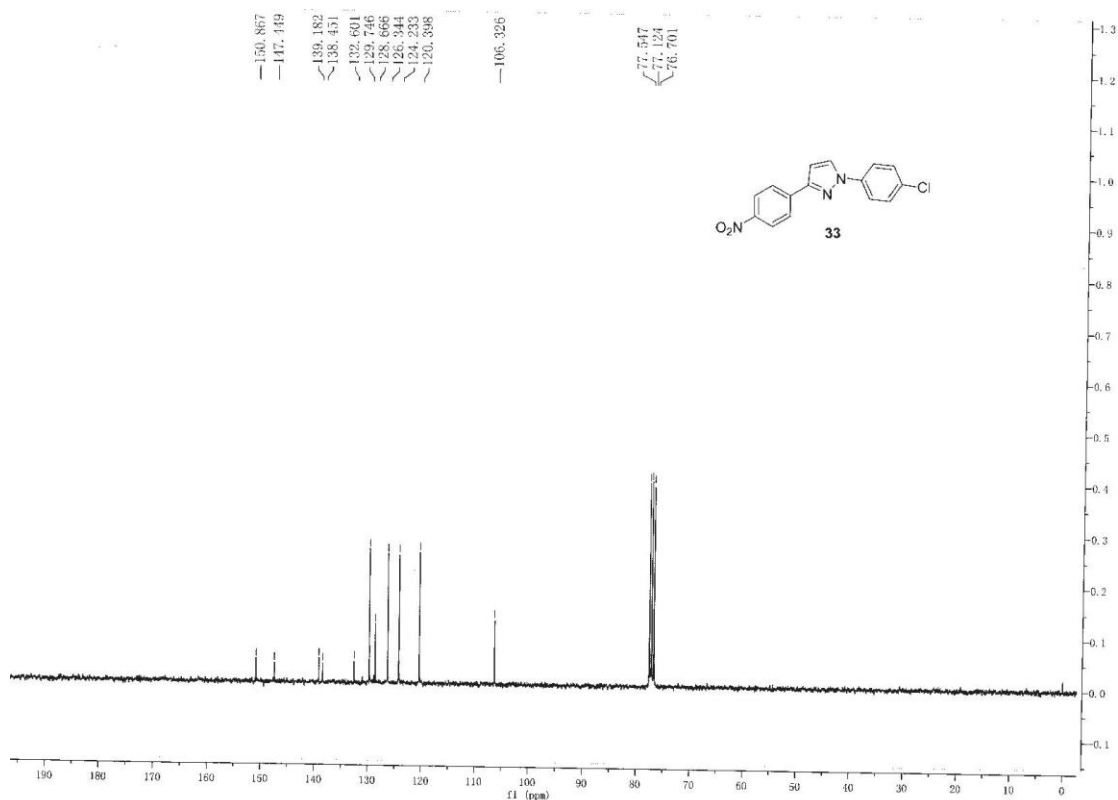



Supporting Information 2

<sup>1</sup>H NMR

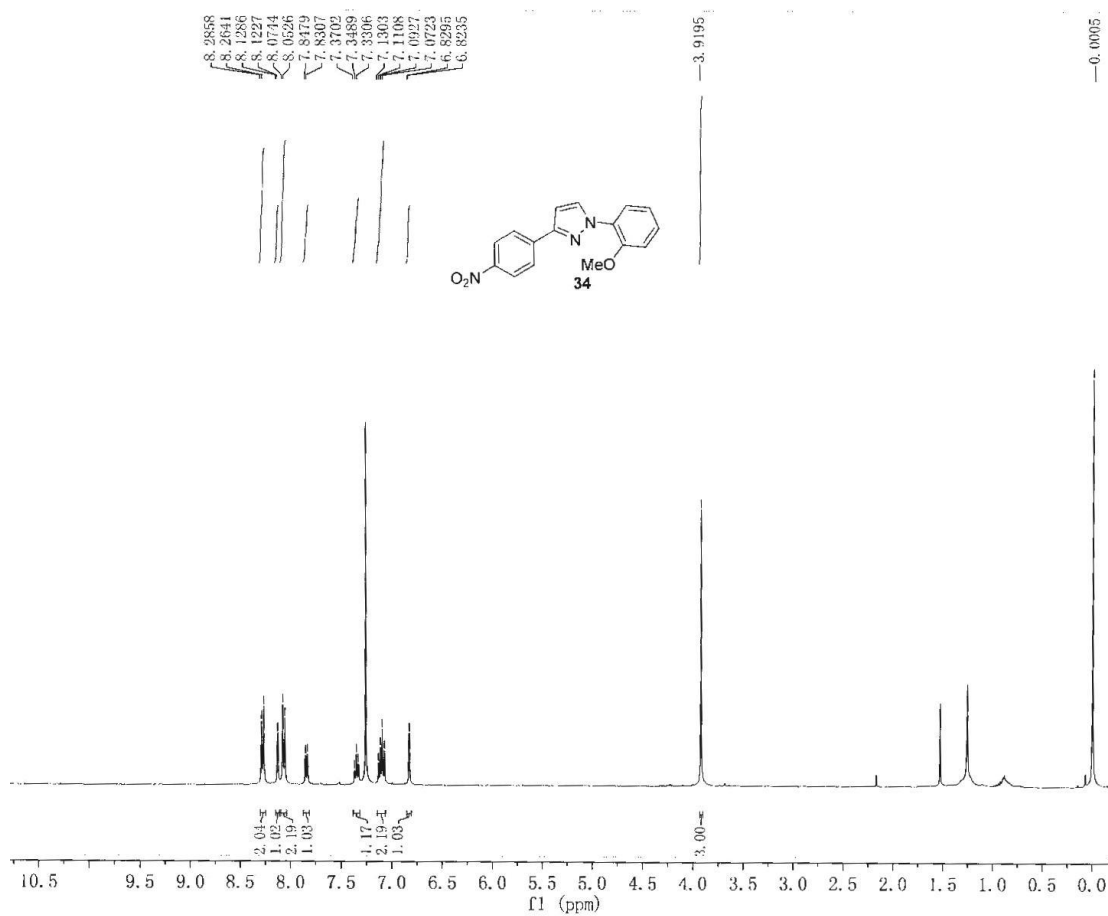

<sup>13</sup>C NMR

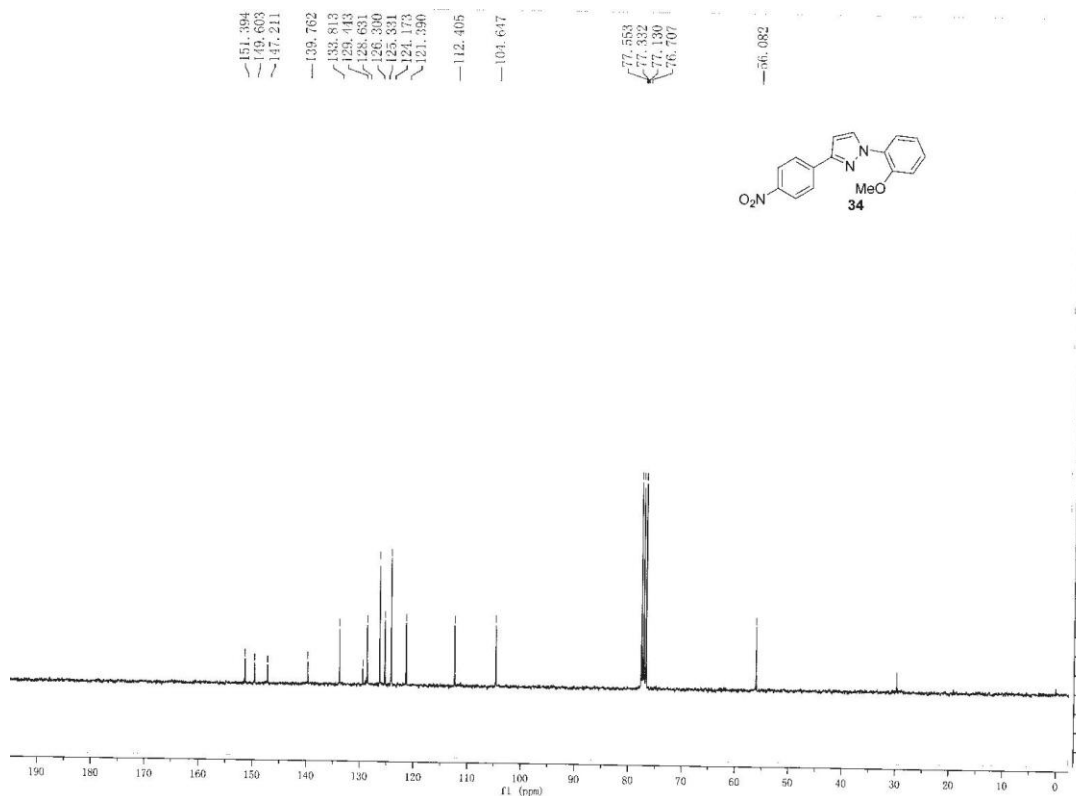

Supporting Information 2

<sup>1</sup>H NMR

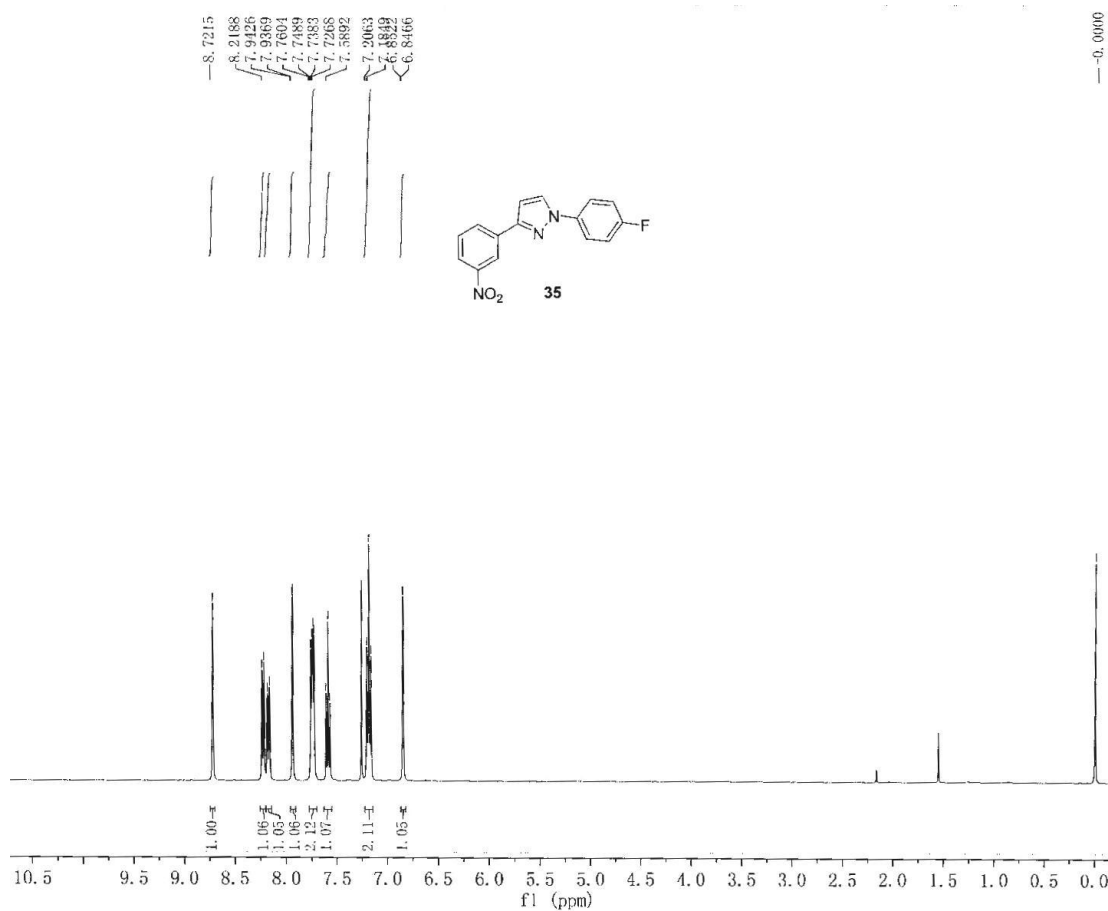

<sup>13</sup>C NMR

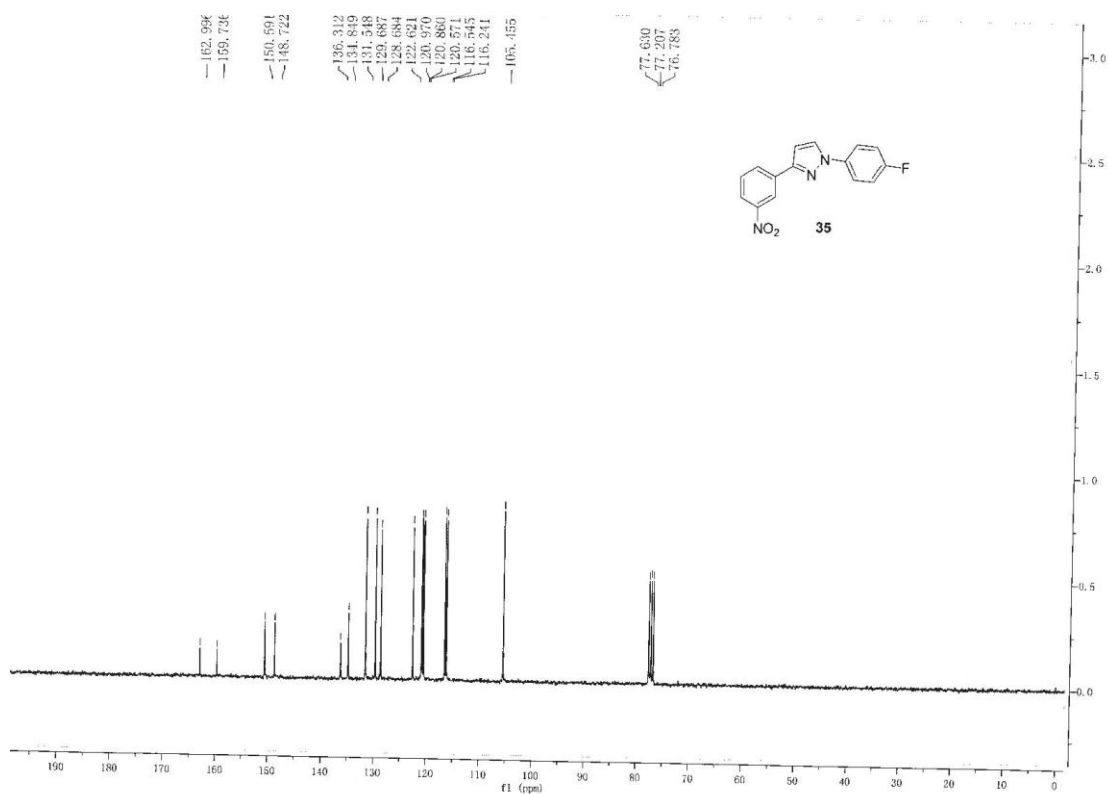

Supporting Information 2

<sup>1</sup>H NMR

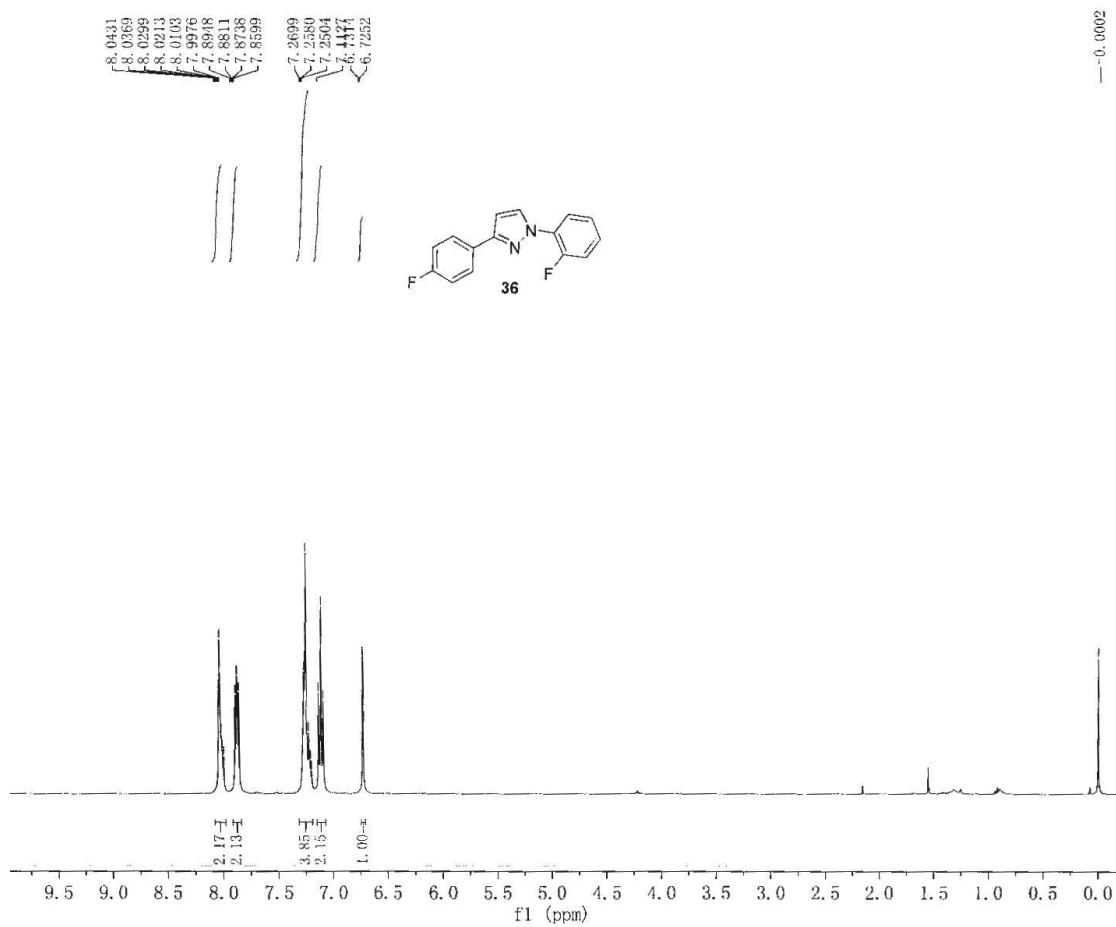

<sup>13</sup>C NMR

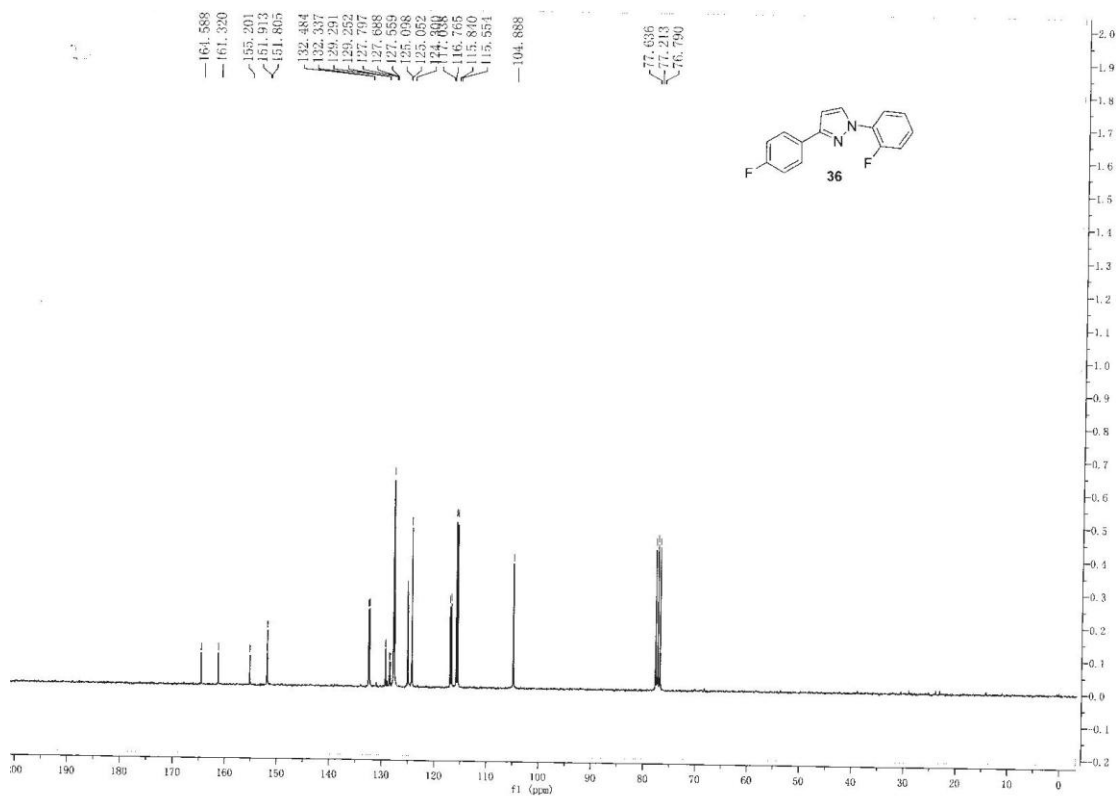

Supporting Information 2

<sup>1</sup>H NMR

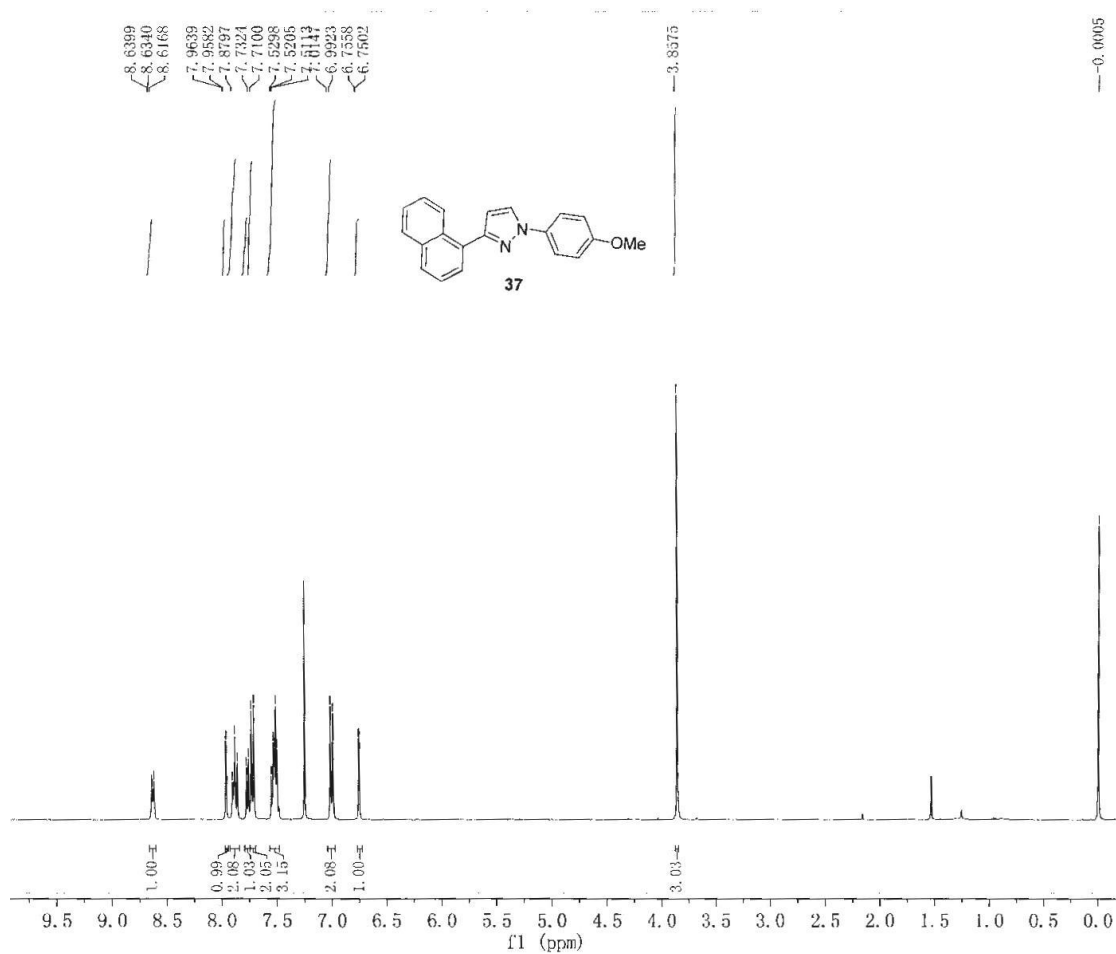

<sup>13</sup>C NMR

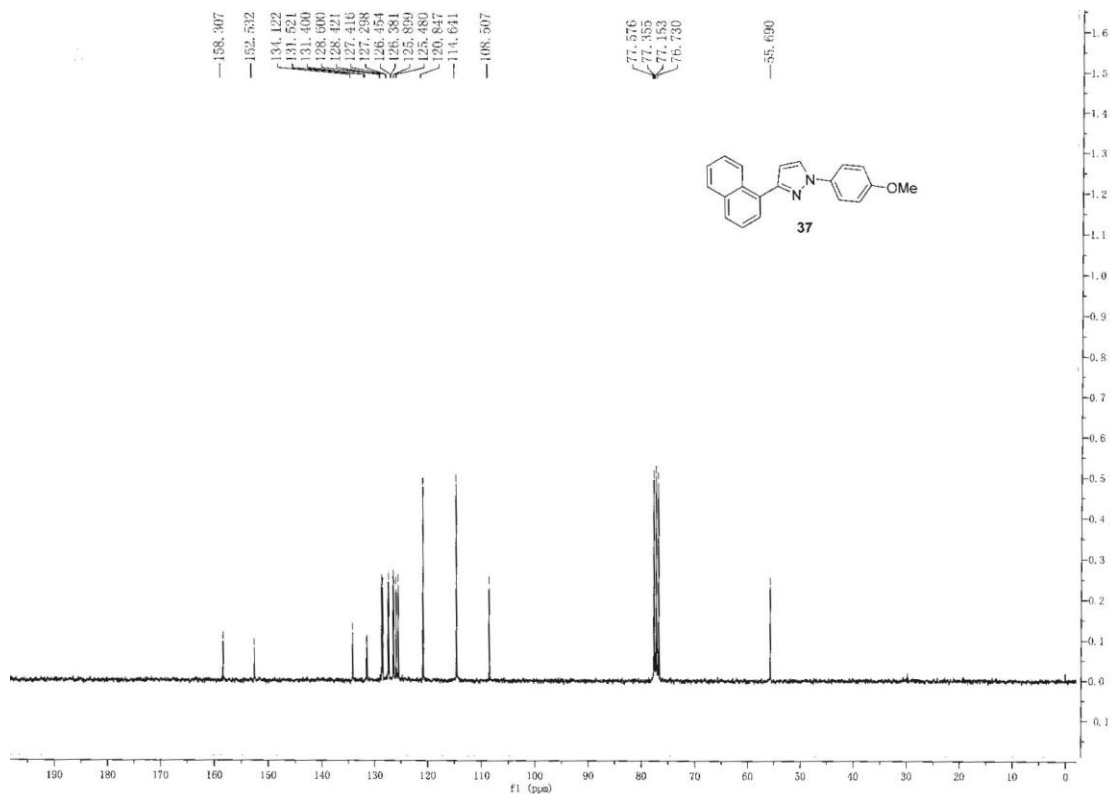

Supporting Information 2

<sup>1</sup>H NMR

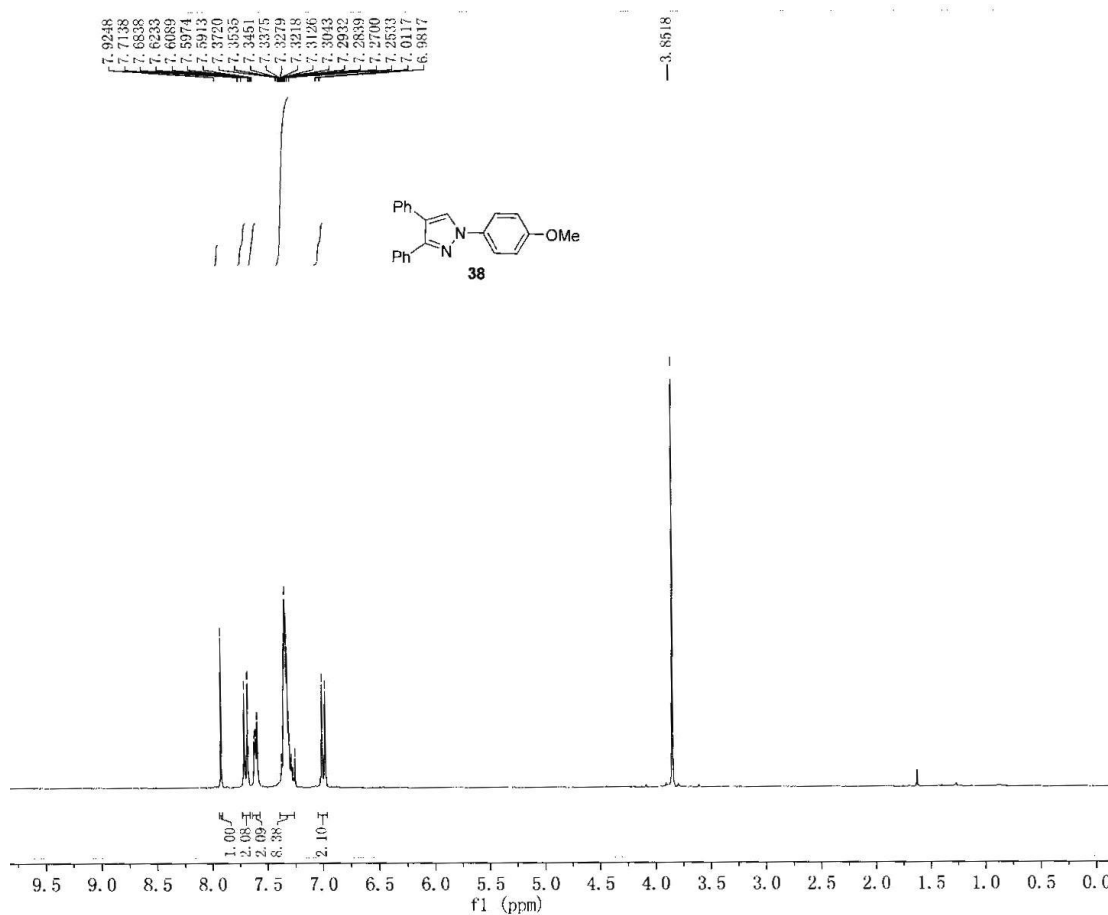

<sup>13</sup>C NMR

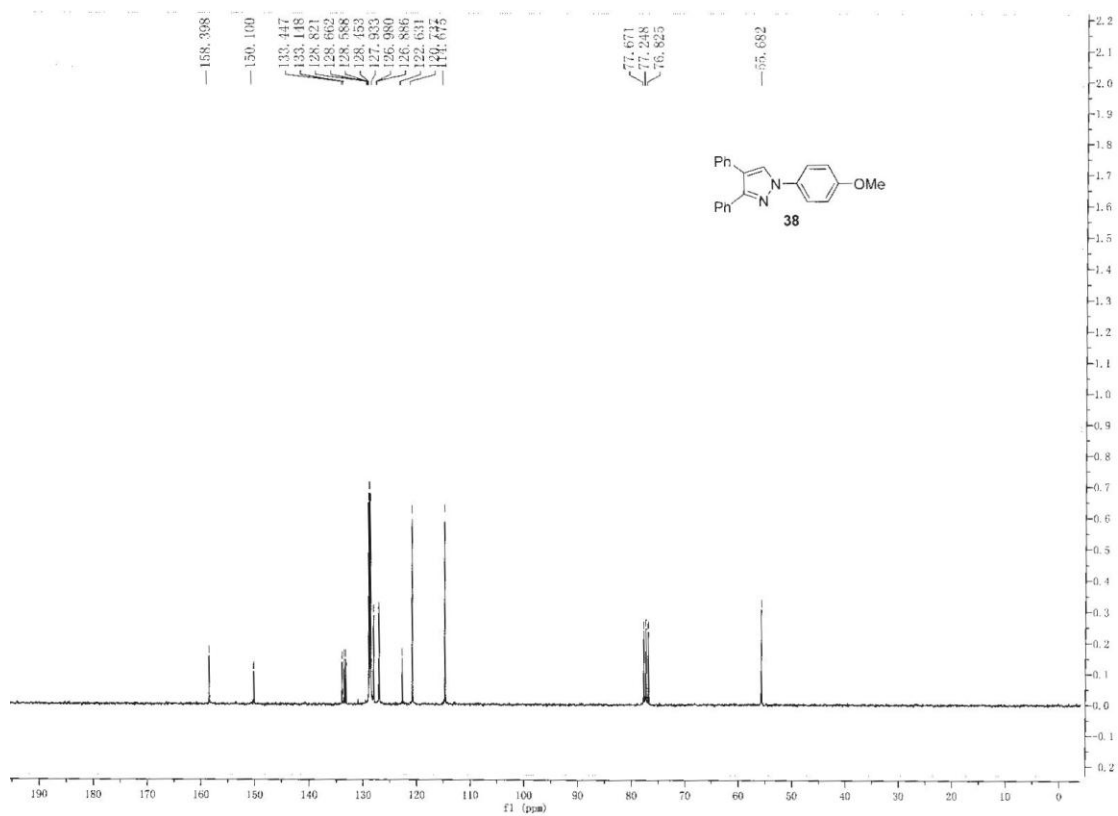

Supporting Information 2

<sup>1</sup>H NMR

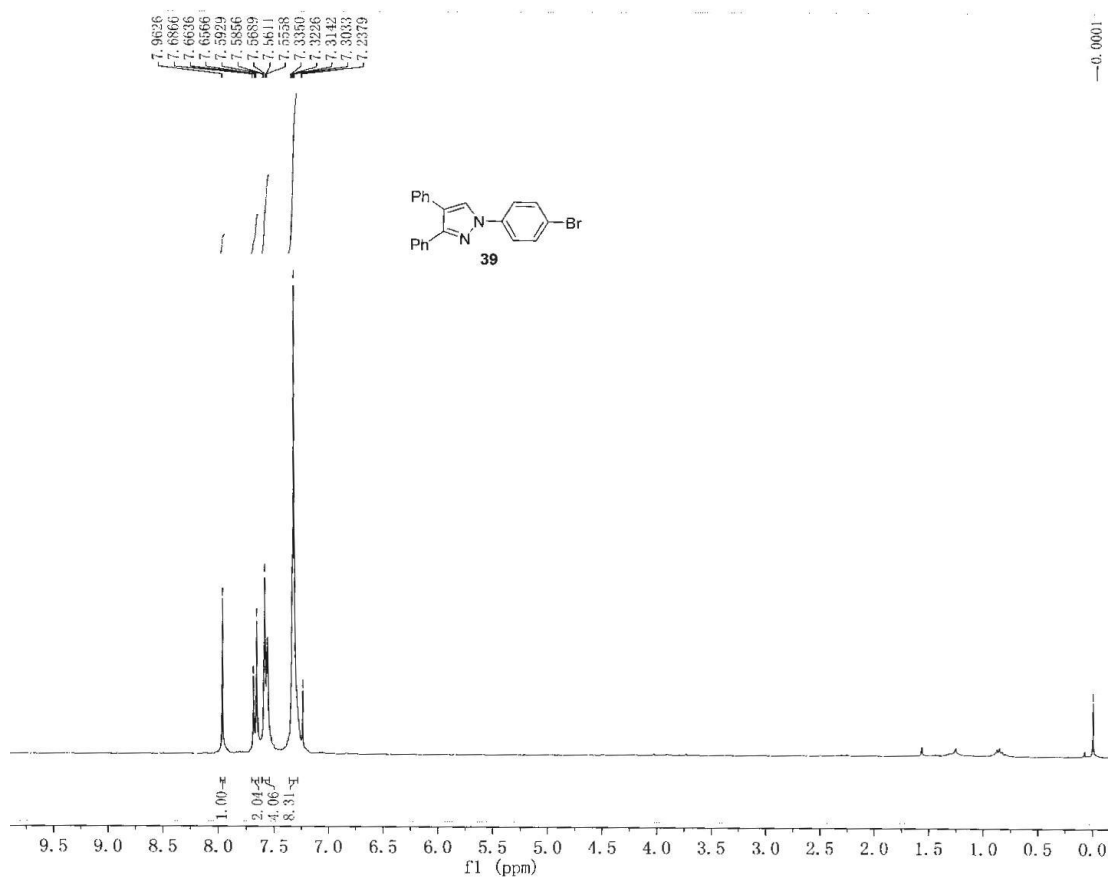

<sup>13</sup>C NMR

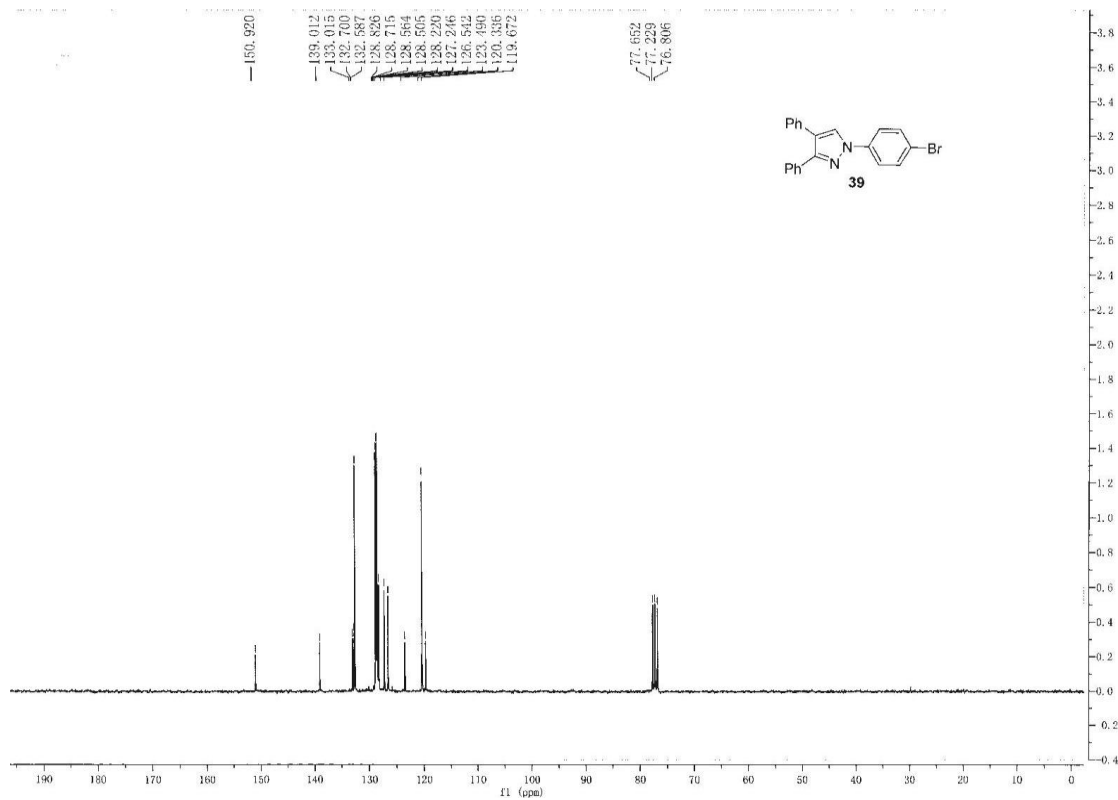

Supporting Information 2

<sup>1</sup>H NMR

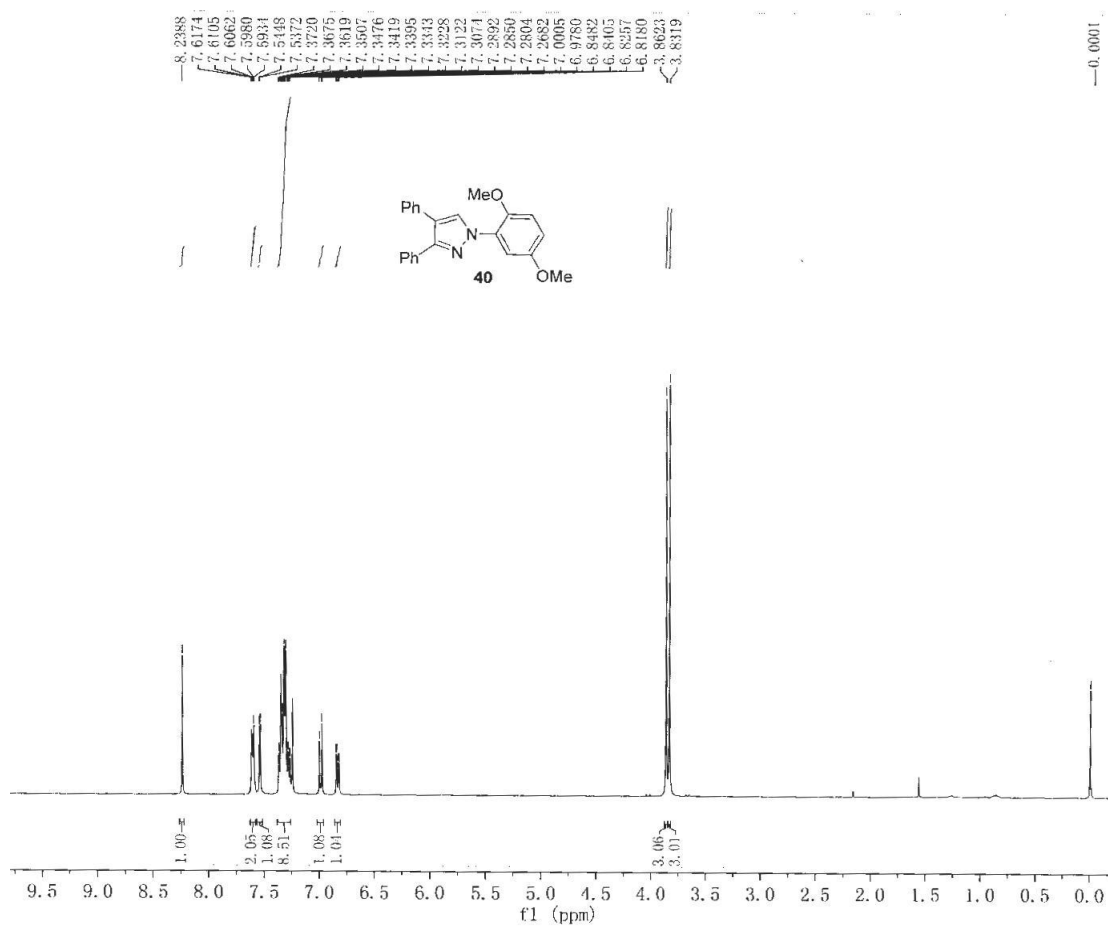

<sup>13</sup>C NMR

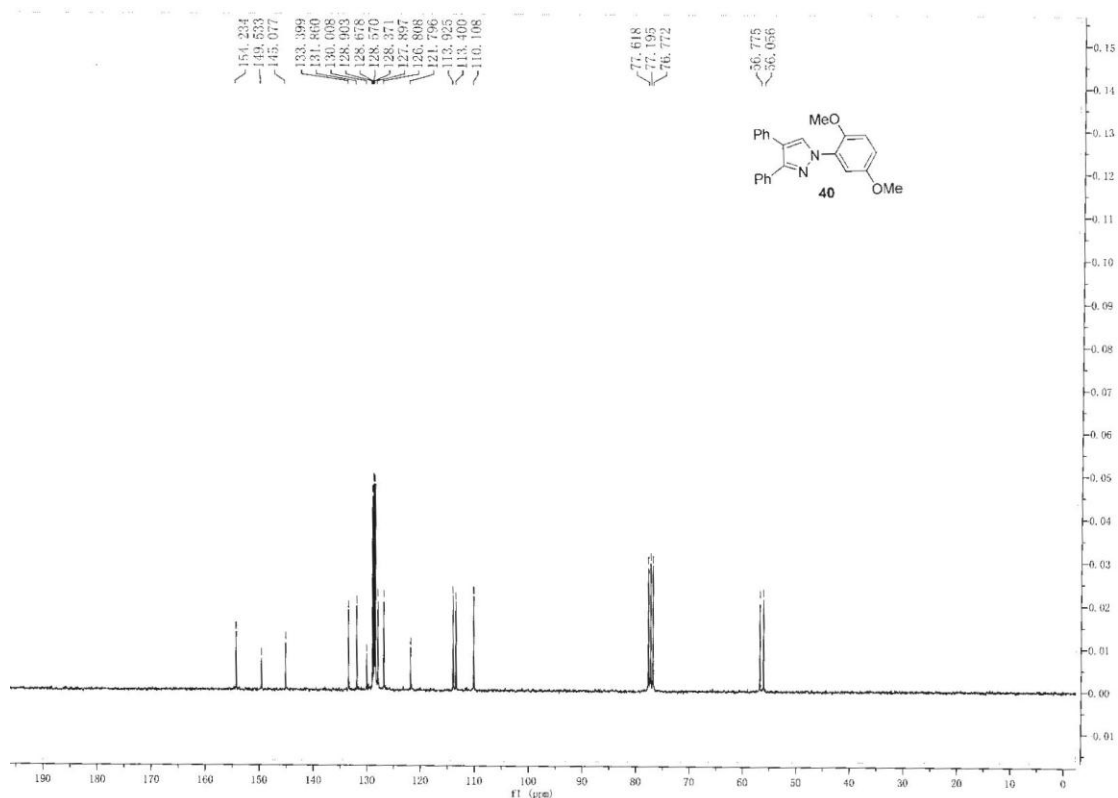

Supporting Information 2

<sup>1</sup>H NMR

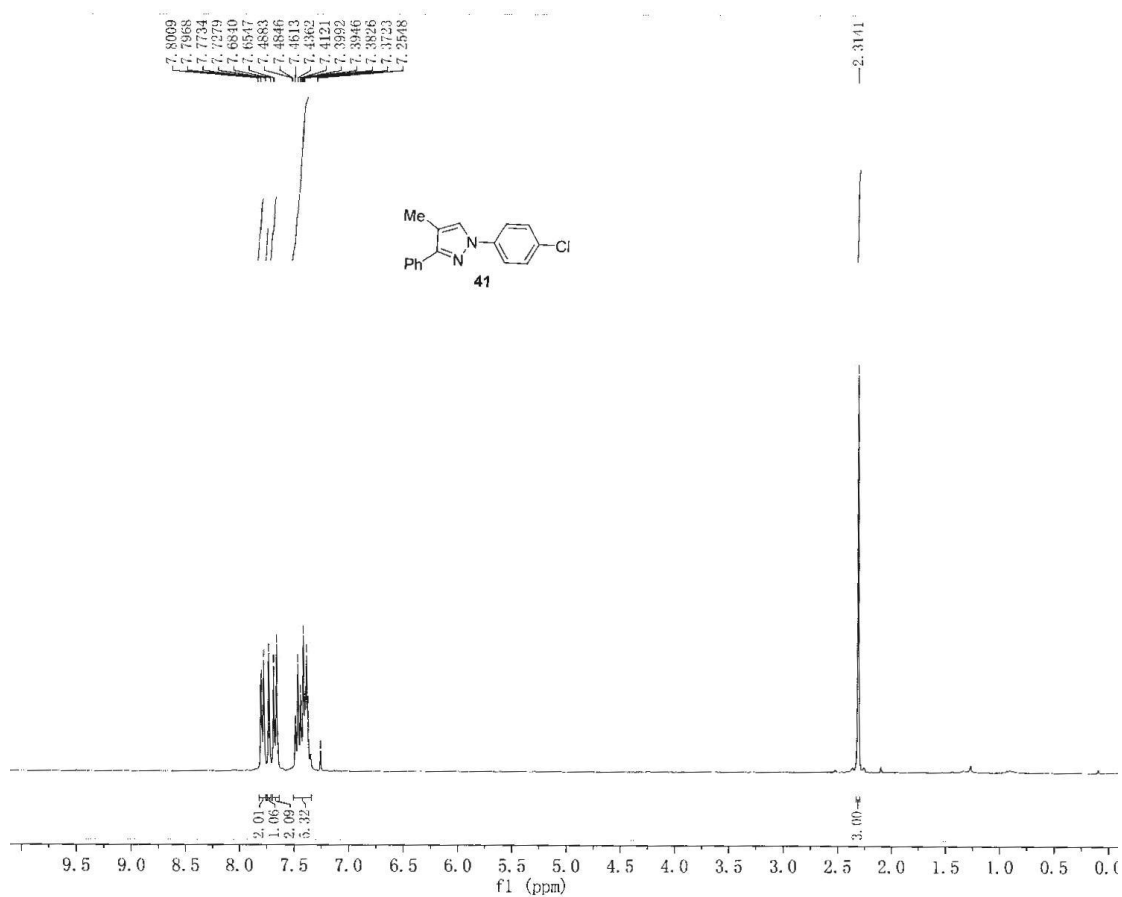

<sup>13</sup>C NMR

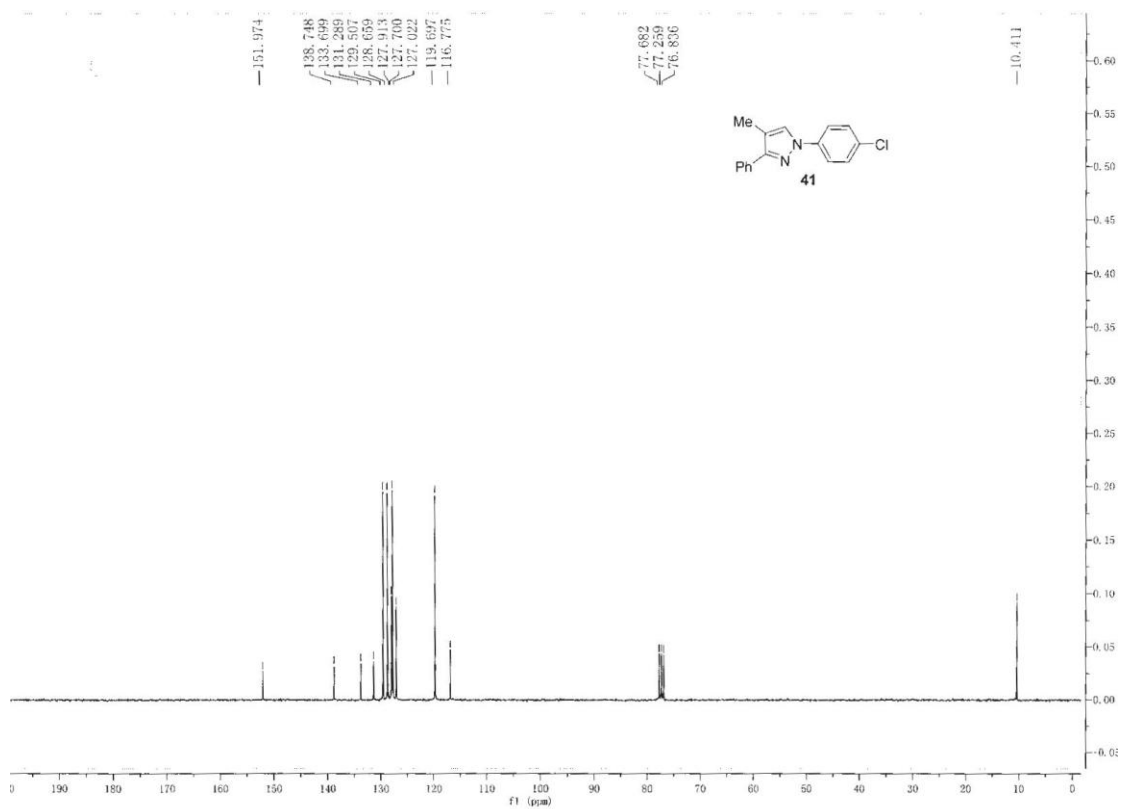



Supporting Information 2

<sup>1</sup>H NMR

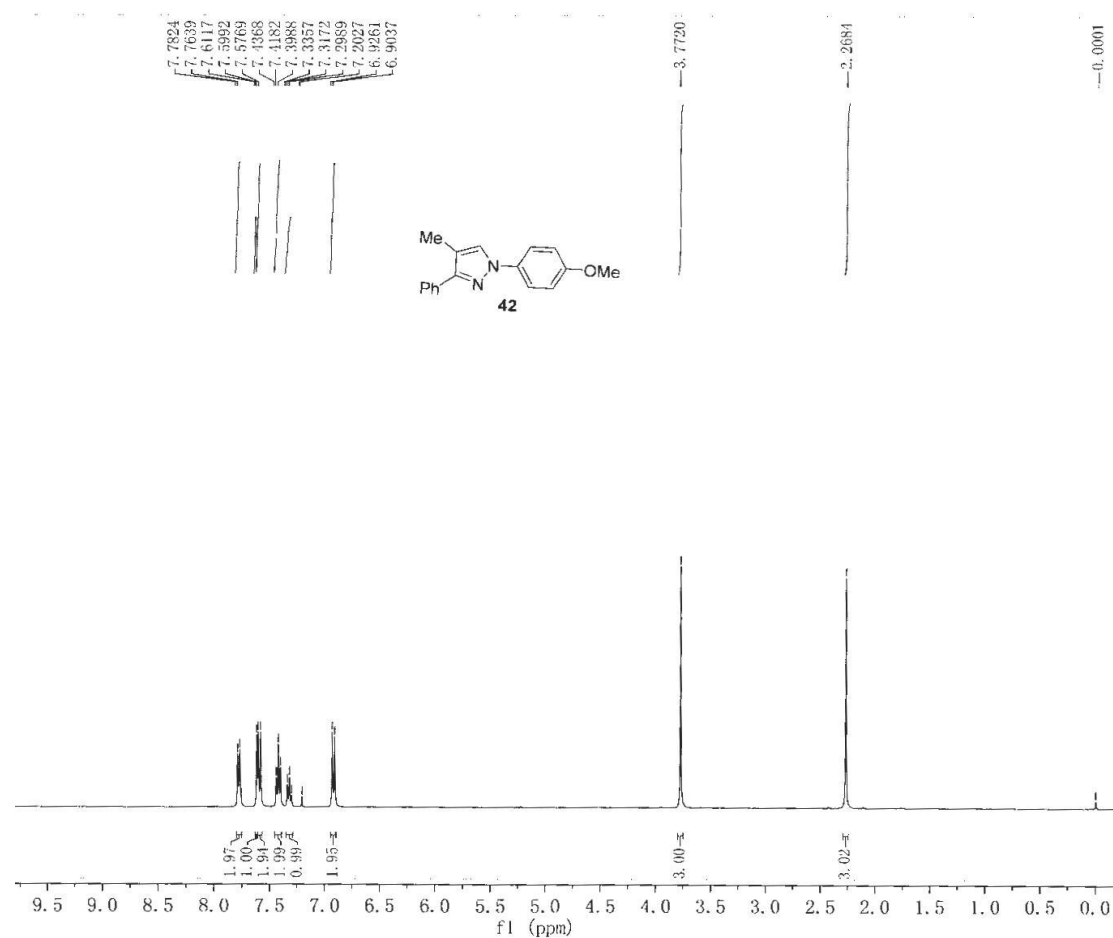

<sup>13</sup>C NMR

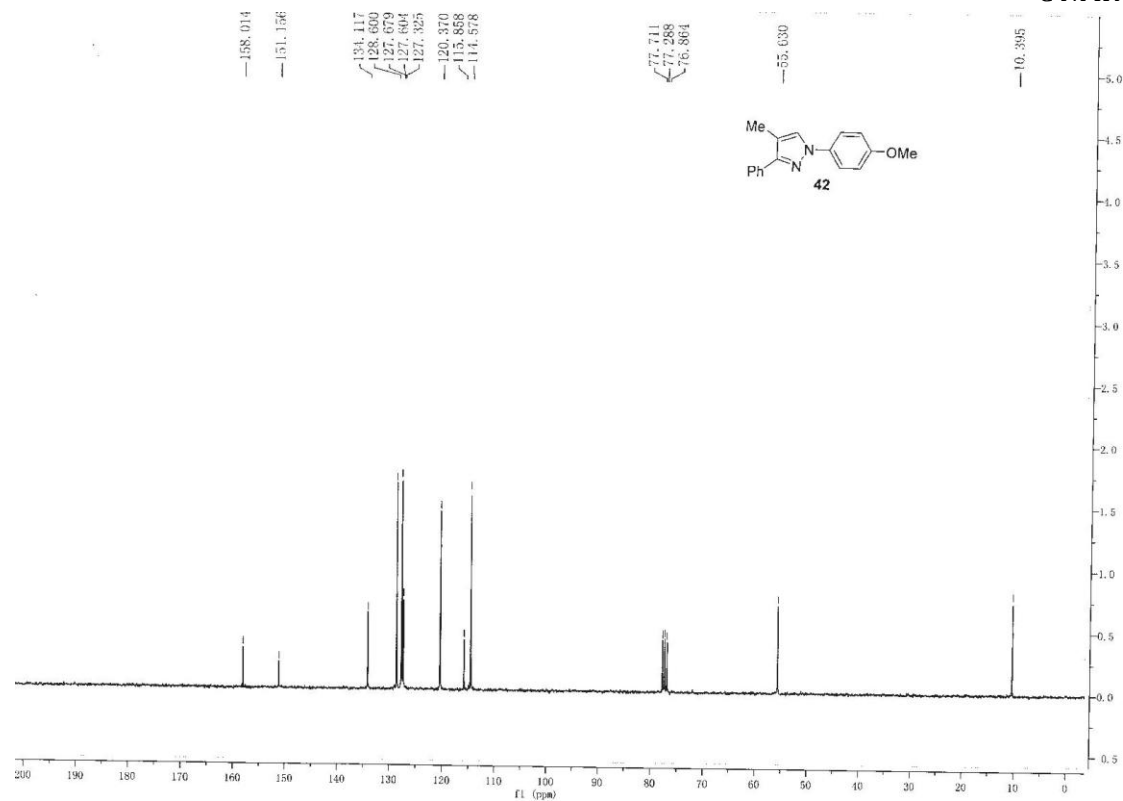

Supporting Information 2

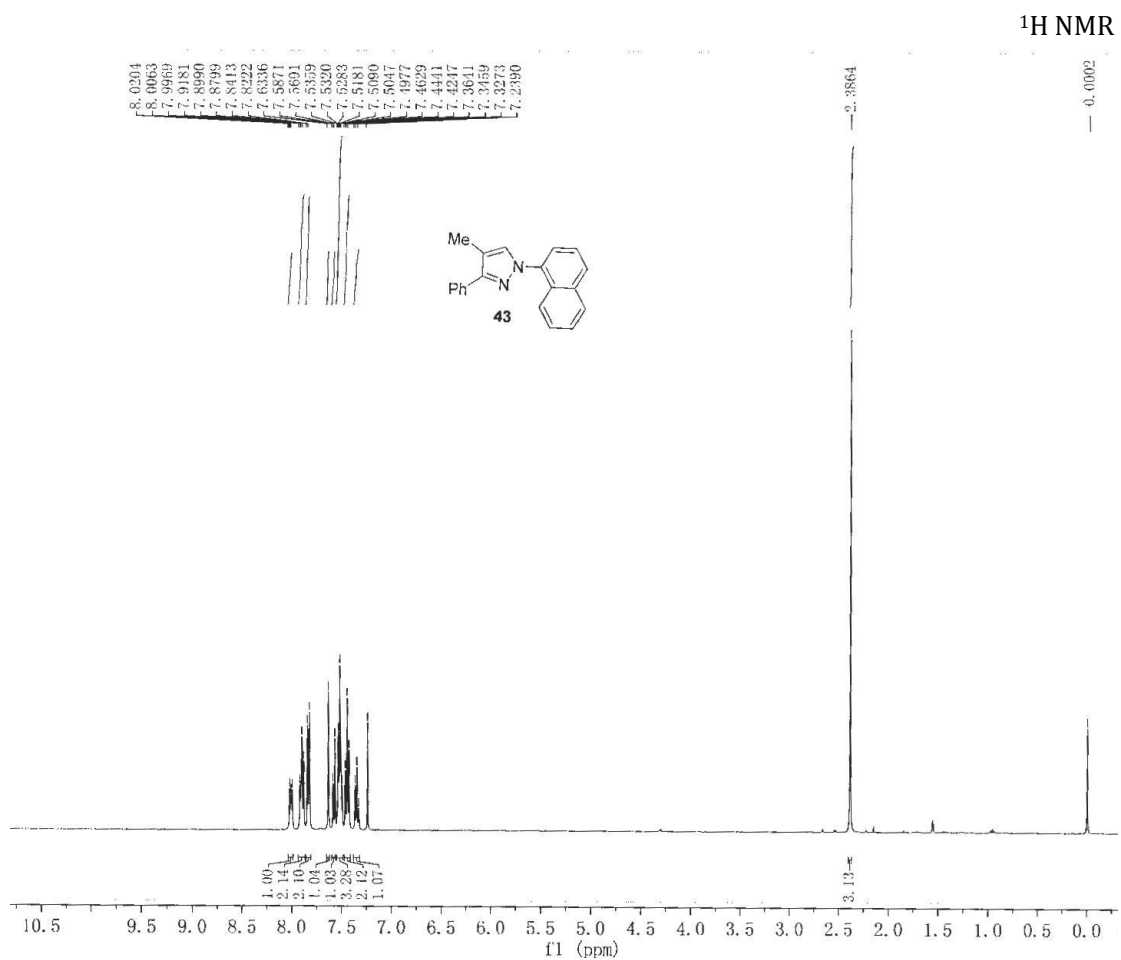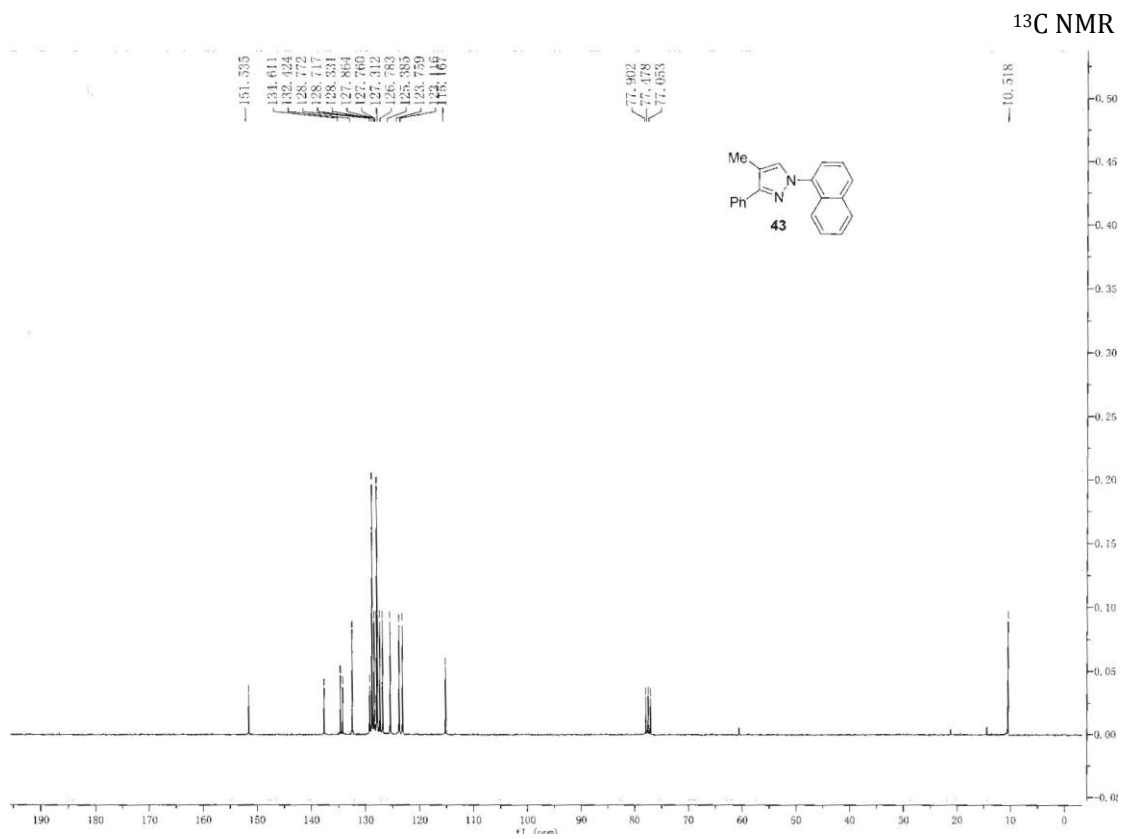

Supporting Information 2

<sup>1</sup>H NMR

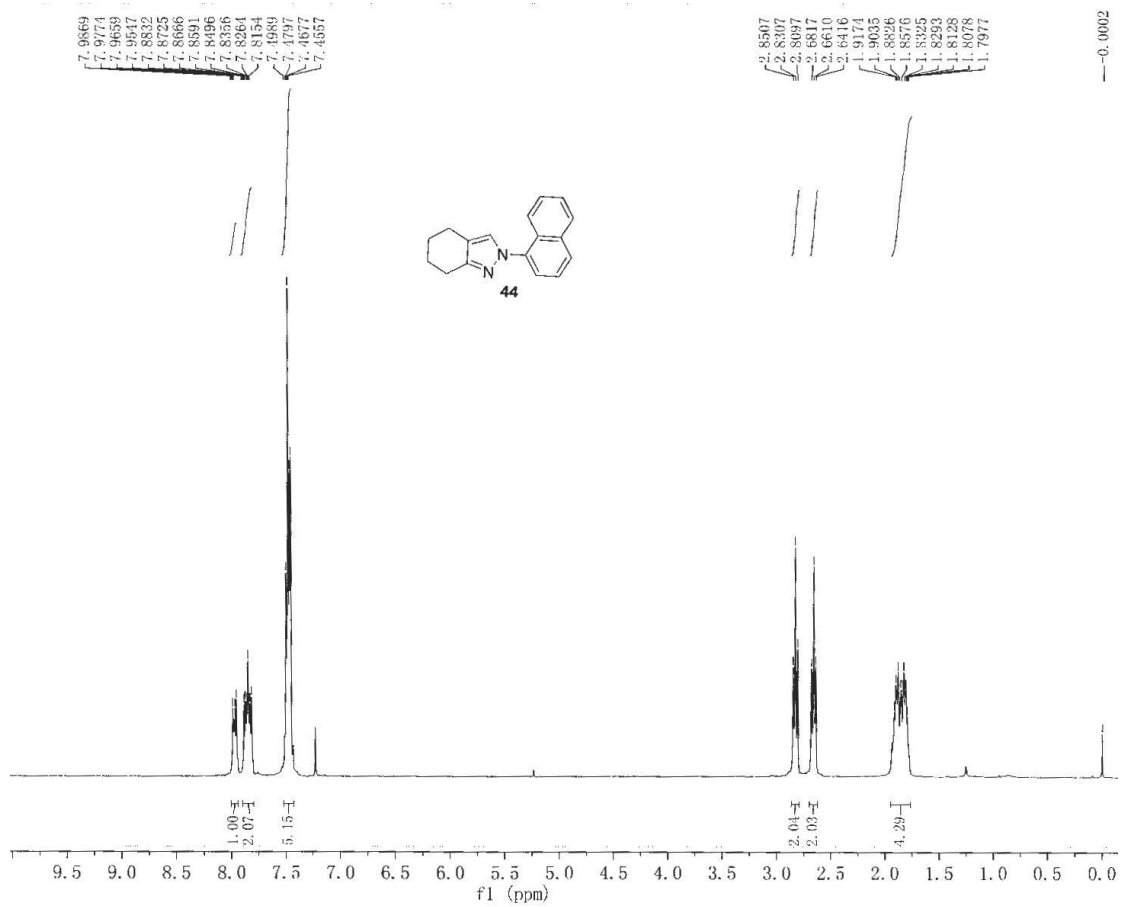

<sup>13</sup>C NMR

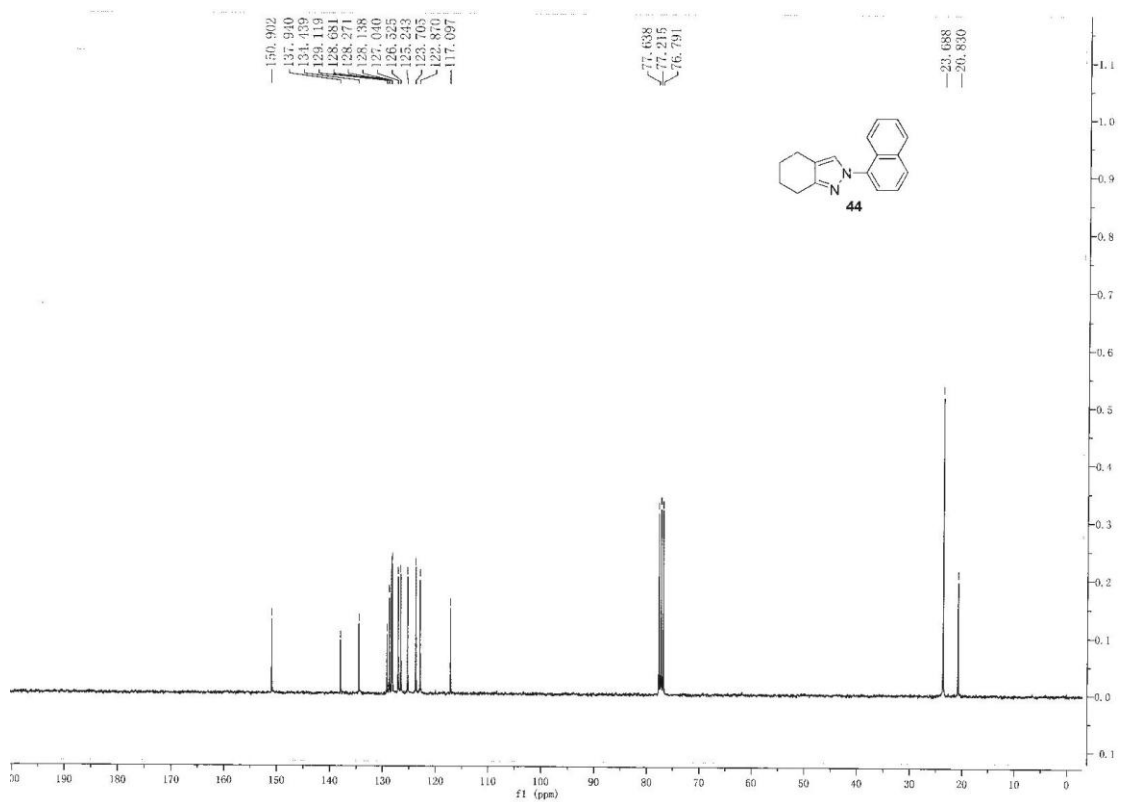

Supporting Information 2

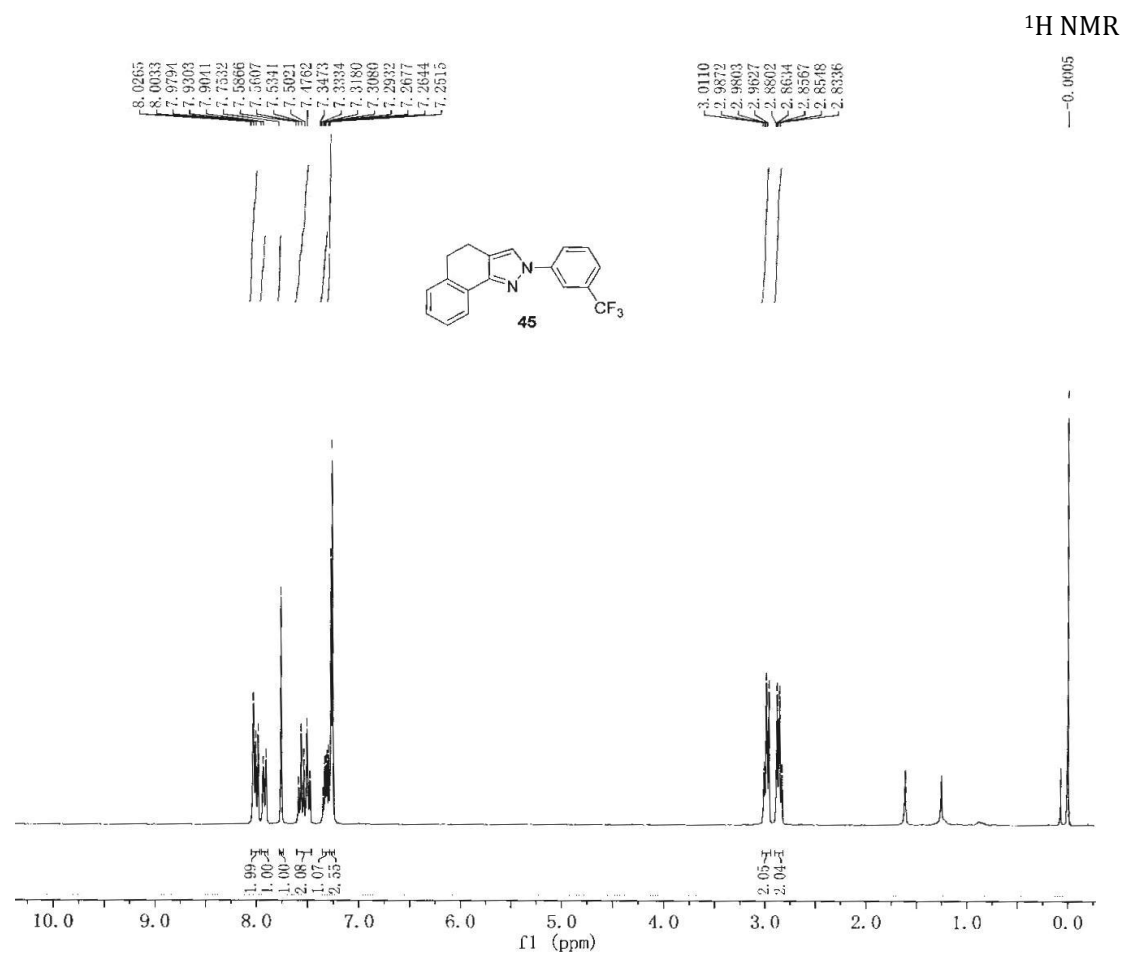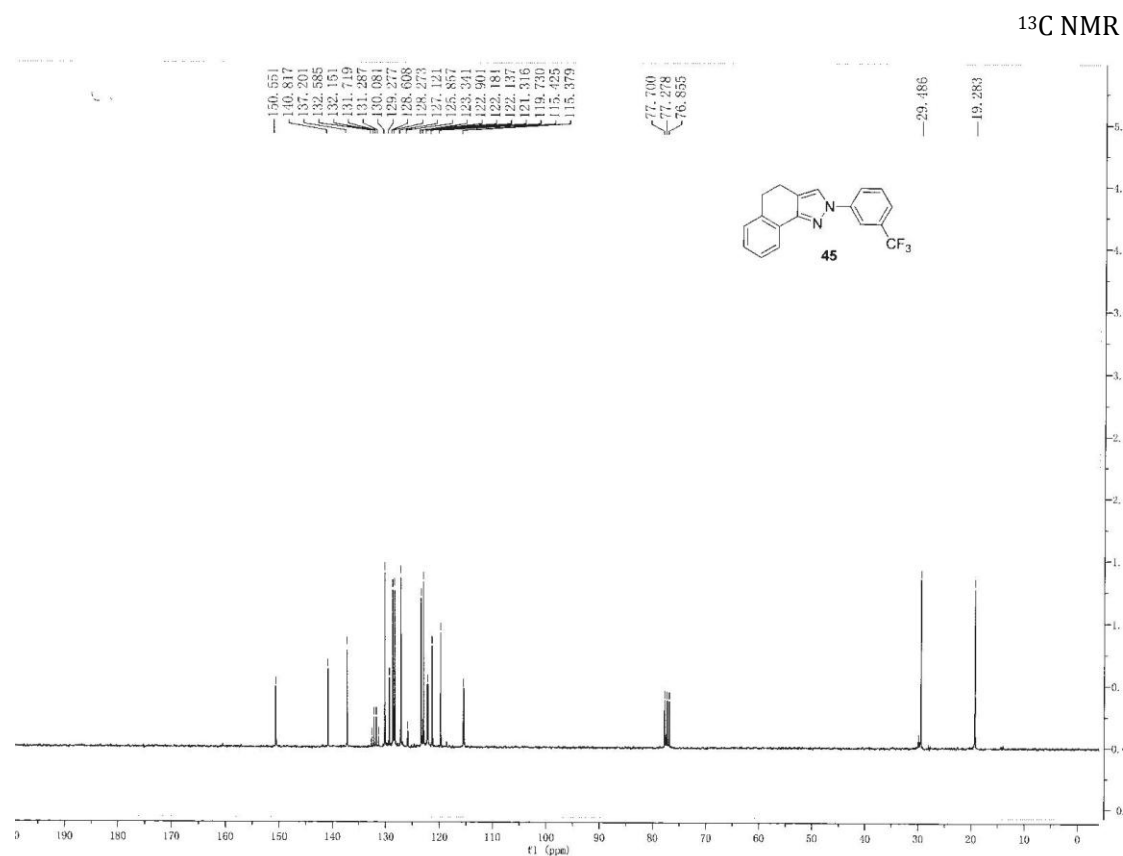

Supporting Information 2

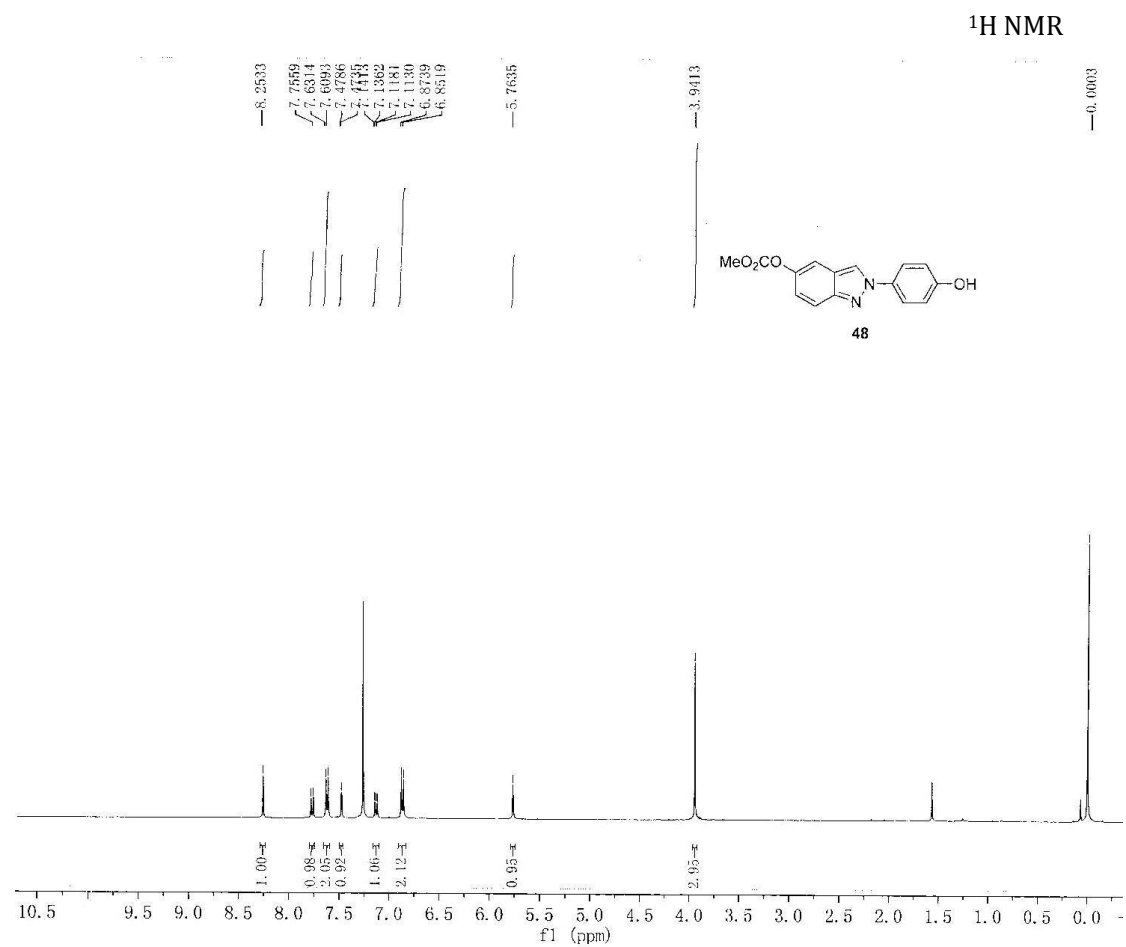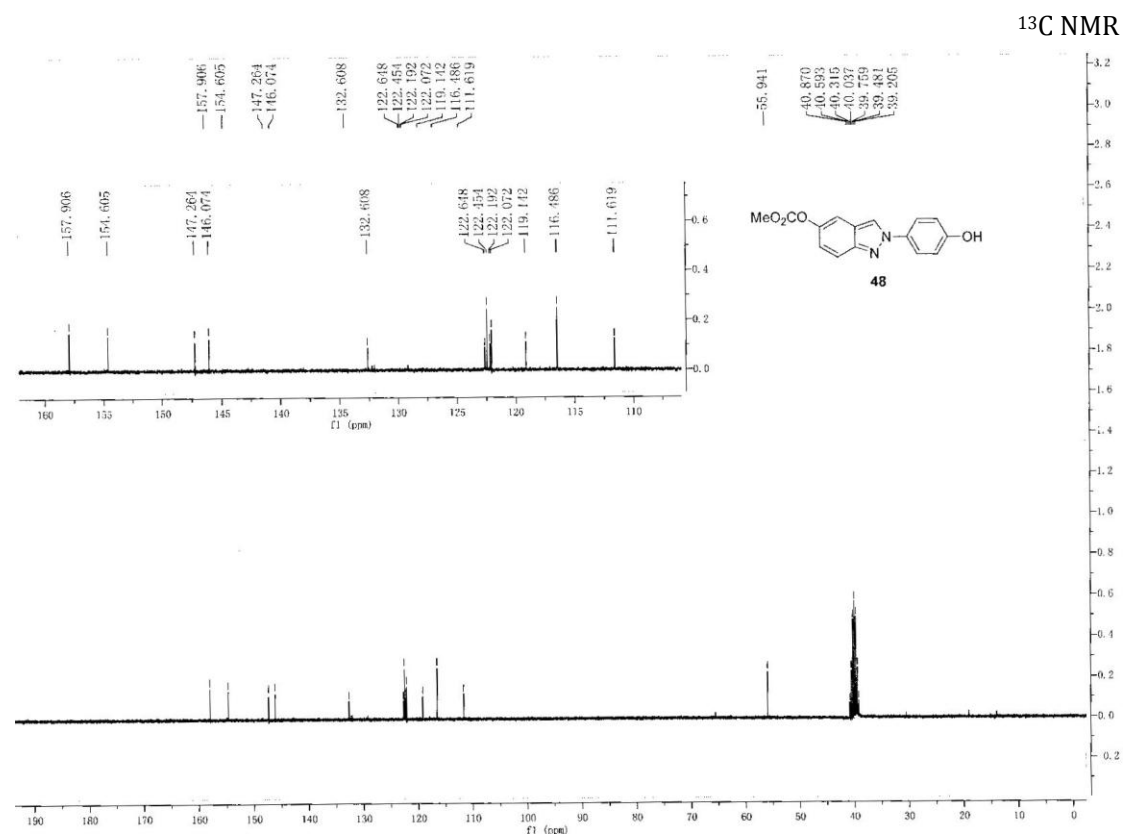

Supporting Information 2

<sup>1</sup>H NMR

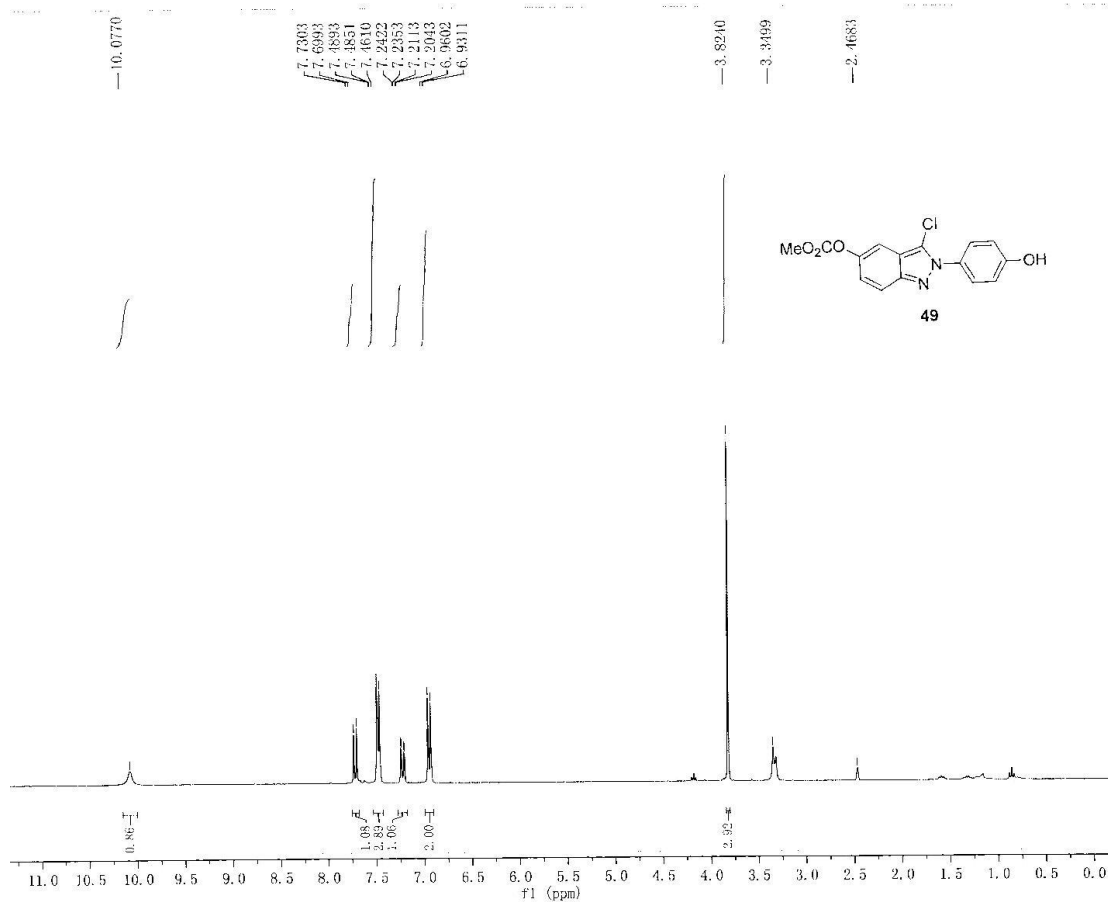

<sup>13</sup>C NMR

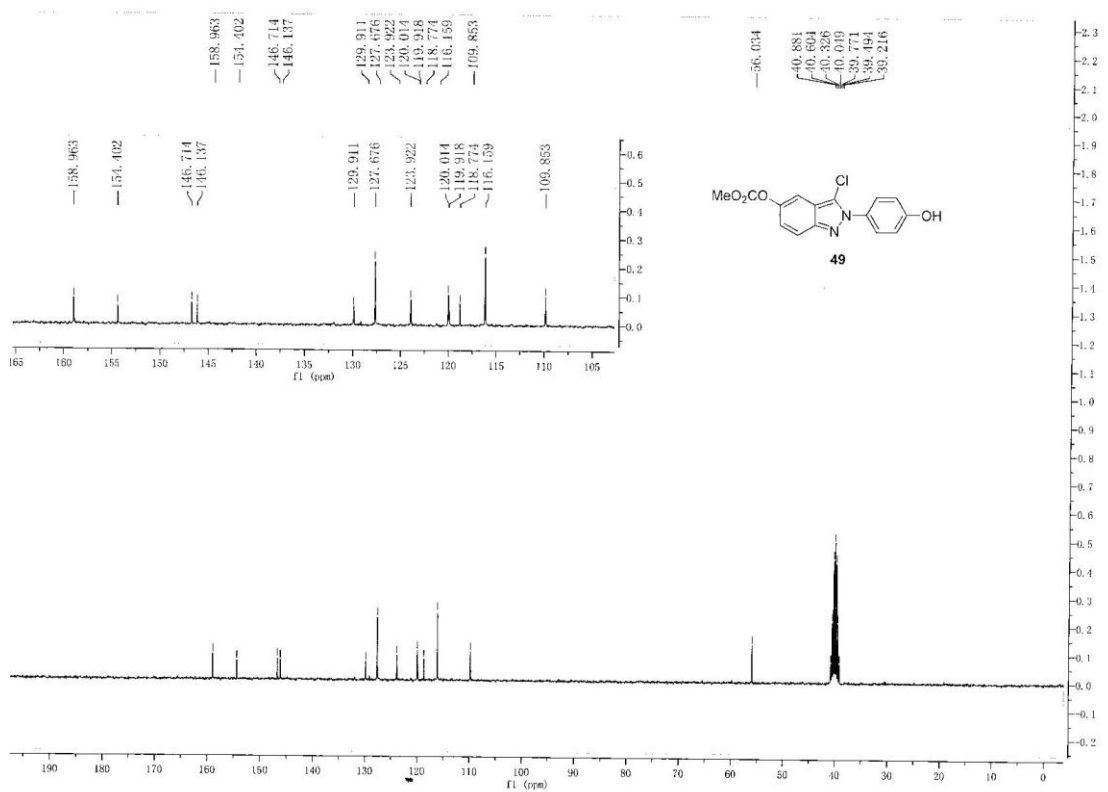

Supporting Information 2

<sup>1</sup>H NMR

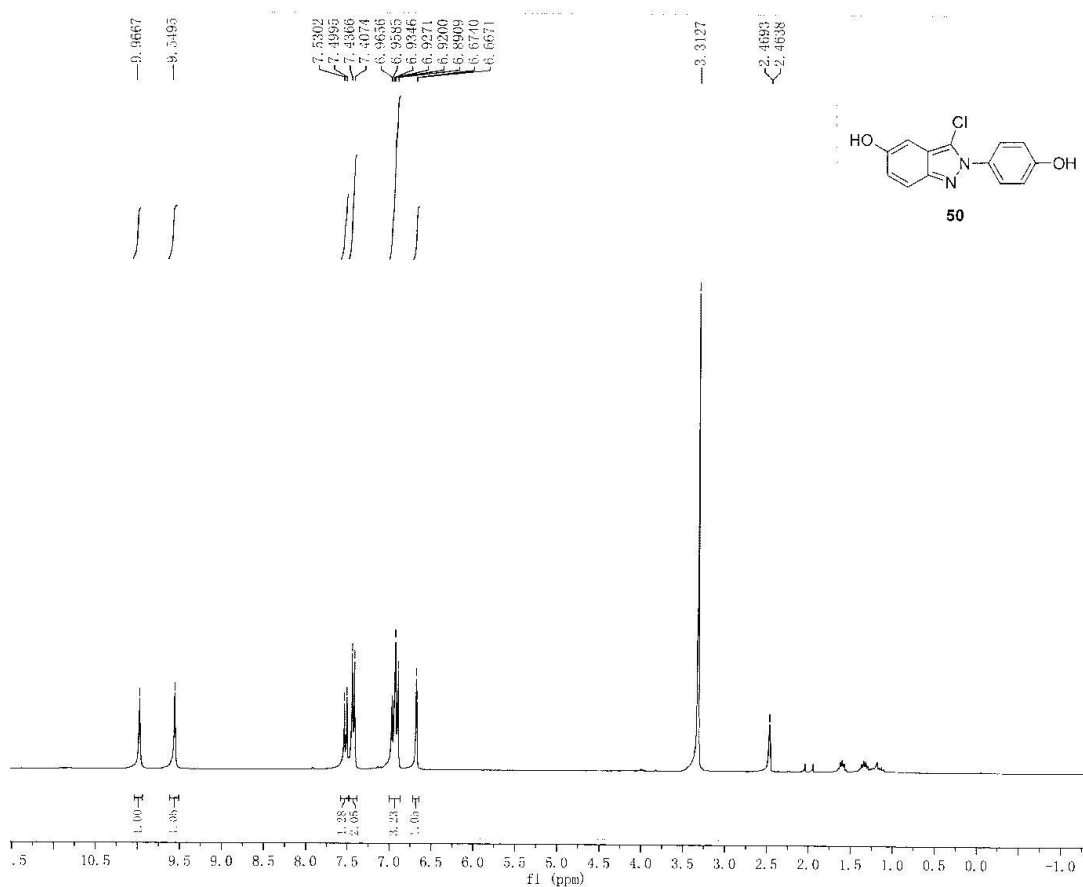

<sup>13</sup>C NMR

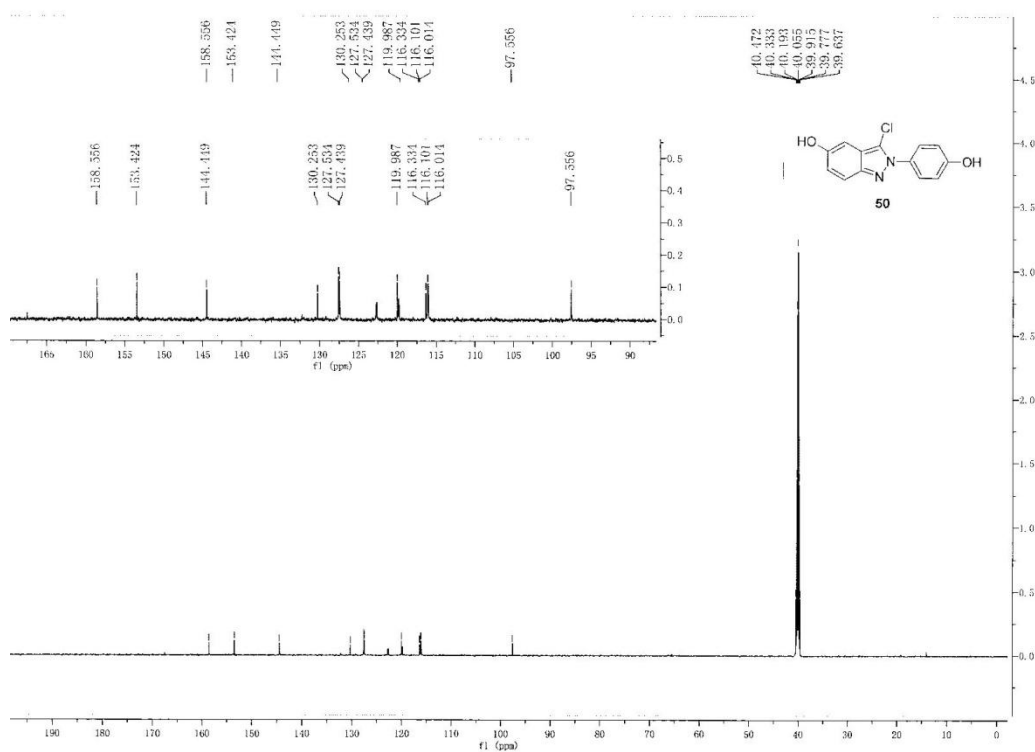

Supplement: c1cc13908h_2.pdf [file c1cc13908h_2.pdf]
